# Supplementary material for: DFT Surface Infers Ten-Vertex Cationic Carboranes from the Corresponding Neutral closo Ten-Vertex Family: The Computed Background Confirming Their Experimental Availability
Source: MDPI journal article supplement (doi:10.3390/molecules28083645), 2023-04-21
Supplement: s1 [file s1]

## *Supplementary Materials*

### **DFT Surface Infers Ten-Vertex Cationic Carboranes from the Corresponding Neutral *Closo* Ten-Vertex Family: The Computed Background Confirming Their Experimental Availability**

**Table S1.** Total Energies (hartrees) and Free Energies (kcal.mol<sup>-1</sup>) Relative to 2NHC+1,2-C<sub>2</sub>B<sub>8</sub>H<sub>10</sub> or 2Idip+1,2-C<sub>2</sub>B<sub>8</sub>H<sub>10</sub>

| Notation              | SMD(DiEthylEther)/<br>B3LYP/6-<br>311+G(2d,p)//<br>B3LYP/6-31G(d) <sup>a,f</sup> | $\Delta G(\text{DEE}, 298\text{K})^b$ |
|-----------------------|----------------------------------------------------------------------------------|---------------------------------------|
| h <sub>2</sub>        | -1.179382                                                                        |                                       |
| nhc                   | -226.266248                                                                      | 0.0                                   |
| o                     | -281.182724                                                                      | 0.0                                   |
| TS <sub>o</sub> /1    | -507.432413                                                                      | 20.9                                  |
| 1                     | -507.484423                                                                      | -8.4                                  |
| TS <sub>1/o</sub> -2  | -733.734716                                                                      | 13.0                                  |
| o-2                   | -733.787922                                                                      | -17.9                                 |
| TS <sub>1/2</sub>     | -507.447611                                                                      | 13.2                                  |
| 2                     | -507.477136                                                                      | -4.5                                  |
| TS <sub>2/o</sub> -1  | -507.467559                                                                      | 0.2                                   |
| o-1                   | -507.494329                                                                      | -14.4                                 |
| p                     | -281.241621                                                                      | -34.5                                 |
| TS <sub>p</sub> /13   | -507.474530                                                                      | -3.6                                  |
| 13                    | -507.498366                                                                      | -17.6                                 |
| TS <sub>13/p</sub> -2 | -733.766674                                                                      | -6.7                                  |
| p-2                   | -733.814923                                                                      | -34.1                                 |
| TS <sub>o</sub> -2/3  | -733.725576                                                                      | 18.5                                  |
| 3                     | -733.728037                                                                      | 16.2                                  |
| TS <sub>3/4</sub>     | -733.728110                                                                      | 16.3                                  |
| 4                     | -733.740811                                                                      | 11.9                                  |
| TS <sub>4/5</sub>     | -733.740909                                                                      | 8.5                                   |
| 5                     | -733.808048                                                                      | -31.3                                 |
| TS <sub>5/6</sub>     | -733.758792                                                                      | -2.0                                  |
| 6                     | -733.819073                                                                      | -37.0                                 |
| TS <sub>6/7</sub>     | -733.735760                                                                      | 11.9                                  |
| 7                     | -733.786000                                                                      | -18.4                                 |
| TS <sub>7/8</sub>     | -733.738867                                                                      | 8.9                                   |
| 8                     | -733.804284                                                                      | -28.8                                 |
| TS <sub>8/m</sub> -2  | -733.781449                                                                      | -15.8                                 |
| TS <sub>m</sub> -2/9  | -733.767404                                                                      | -7.4                                  |
| 9                     | -733.779640                                                                      | -15.4                                 |
| TS <sub>9/p</sub> -2  | -733.758536                                                                      | -1.8                                  |
| m                     | -281.209091                                                                      | -16.2                                 |

|                                                                                           |              |       |
|-------------------------------------------------------------------------------------------|--------------|-------|
| TSm/10                                                                                    | -507.451673  | 9.3   |
| 10                                                                                        | -507.495484  | -15.2 |
| TS10/11                                                                                   | -507.463048  | 3.7   |
| 11                                                                                        | -507.460468  | 4.7   |
| TS11/12                                                                                   | -507.458765  | 6.5   |
| 12                                                                                        | -507.472445  | -1.9  |
| TS12/m-2                                                                                  | -733.758184  | -1.5  |
| m-2                                                                                       | -733.814934  | -34.7 |
| TS5/14                                                                                    | -733.754639  | -0.7  |
| 14                                                                                        | -507.517441  | -29.1 |
| TS14/15                                                                                   | -507.473069  | -3.5  |
| 15                                                                                        | -507.509838  | -24.4 |
| TS6/15                                                                                    | -733.767806  | -8.5  |
| TS15/16                                                                                   | -507.436455  | 19.9  |
| 16                                                                                        | -507.459341  | 6.8   |
| TS16/17                                                                                   | -507.431420  | 22.8  |
| 17                                                                                        | -507.498736  | -18.3 |
| TS17/13                                                                                   | -507.434923  | 20.0  |
| p-2a                                                                                      | -734.253381  | -26.7 |
| TSp-2a19a                                                                                 | -734.219203  | -8.3  |
| 19a                                                                                       | -733.073819  | -40.2 |
| TS19a/20a                                                                                 | -733.042901  | -22.9 |
| 20a                                                                                       | -506.801367  | -49.5 |
| o-2a                                                                                      | -734.265808  | -33.2 |
| TSo-2a/21a                                                                                | -734.191626  | 10.0  |
| 21a                                                                                       | -734.192156  | 9.8   |
| TS21a/22a                                                                                 | -734.191438  | 10.6  |
| 22a                                                                                       | -734.216167  | -4.6  |
| TS22a/23a                                                                                 | -734.206516  | 1.3   |
| Existing entries below were made with<br>SMD(DiEthylEther)/<br>B3LYP/6-311+G(2d,p)+D3(BJ) |              |       |
| Idip                                                                                      | -1160.535292 | 0.0   |
| o                                                                                         | -281.230118  | 0.0   |
| Idip(o-1)                                                                                 | -1441.828914 | -21.8 |
| Idip(o-2)-a <sup>d</sup>                                                                  | -2602.394971 | -21.8 |
| Idip(o-2)-b <sup>d</sup>                                                                  | -2602.394966 | -21.7 |
| Idip(m-2)-a <sup>e</sup>                                                                  | -2602.433192 | -47.0 |
| Idip(m-2)-b <sup>e</sup>                                                                  | -2602.433390 | -47.4 |
| Idip(20a)                                                                                 | -1441.140689 | -61.2 |
| Idip(p-2)                                                                                 | -2602.435708 | -49.0 |
| Idip(o-2a)                                                                                | -2602.887488 | -47.3 |
| Idip(m-2a)                                                                                | -2602.909432 | -63.6 |
| Idip(p-2a)                                                                                | -2602.886318 | -50.1 |

(a) The calculation with the Idip ligands were done with the D3(BJ) correction.

(b) Zero-point correction, heat capacity correction, and entropy correction to 298K made with frequencies from the B3LYP/6-31G(d) level.

(c) Known species have the following designations:

o = 1,2-C<sub>2</sub>B<sub>8</sub>H<sub>10</sub>

m = 1,6-C<sub>2</sub>B<sub>8</sub>H<sub>10</sub>

p = 1,10-C<sub>2</sub>B<sub>8</sub>H<sub>10</sub>

o-1 = C<sub>2</sub>B<sub>8</sub>H<sub>10</sub>-NHC

o-2 = C<sub>2</sub>B<sub>8</sub>H<sub>10</sub>-(NHC)<sub>2</sub>

m-2 = C<sub>2</sub>B<sub>8</sub>H<sub>10</sub>-(NHC)<sub>2</sub>

p-2 = C<sub>2</sub>B<sub>8</sub>H<sub>10</sub>-(NHC)<sub>2</sub>

o-2a = C<sub>2</sub>B<sub>8</sub>H<sub>11</sub>-(NHC)<sub>2</sub>(+)

20a = C<sub>2</sub>B<sub>8</sub>H<sub>9</sub>-NHC(+)

(d) The two structures of Idip(o-2) differ by the relative orientation of the two Idip groups, NIMAG=0.

(e) The two structures of Idip(m-2) differ by the relative orientation of the two Idip group, NIMAG=0.

(f) The energy of the cation entries (notation ending with “a”) are with respect to 2NHC+1,2-C<sub>2</sub>B<sub>8</sub>H<sub>10</sub> + 2HCl or Idip2 +1,2-C<sub>2</sub>B<sub>8</sub>H<sub>10</sub> + 2HCl and yielding product + ClHCl<sup>+</sup>.

**Table S2. Cartesian Coordinates of Stationary Points listed in Table S1 Optimized at the B3LYP/6-31G(d) Level**

nhc

Standard orientation:

| Center<br>Number | Atomic<br>Number | Atomic<br>Type | Coordinates (Angstroms) |           |           |
|------------------|------------------|----------------|-------------------------|-----------|-----------|
|                  |                  |                | X                       | Y         | Z         |
| 1                | 6                | 0              | 0.000000                | 0.000000  | 1.285368  |
| 2                | 7                | 0              | -0.000000               | 1.049834  | 0.402871  |
| 3                | 1                | 0              | -0.000000               | 2.006592  | 0.722116  |
| 4                | 6                | 0              | -0.000000               | 0.677956  | -0.940358 |
| 5                | 1                | 0              | -0.000000               | 1.384836  | -1.756166 |
| 6                | 7                | 0              | -0.000000               | -1.049834 | 0.402871  |
| 7                | 1                | 0              | -0.000000               | -2.006592 | 0.722116  |
| 8                | 6                | 0              | -0.000000               | -0.677956 | -0.940358 |
| 9                | 1                | 0              | -0.000000               | -1.384836 | -1.756166 |

o

Standard orientation:

| Center<br>Number | Atomic<br>Number | Atomic<br>Type | Coordinates (Angstroms) |           |           |
|------------------|------------------|----------------|-------------------------|-----------|-----------|
|                  |                  |                | X                       | Y         | Z         |
| 1                | 6                | 0              | -0.885960               | 1.385836  | 0.000000  |
| 2                | 5                | 0              | -0.354757               | 0.634905  | 1.317075  |
| 3                | 5                | 0              | 0.721068                | 1.333995  | 0.000000  |
| 4                | 5                | 0              | -0.354757               | -1.145914 | 0.916692  |
| 5                | 5                | 0              | -0.354757               | -1.145914 | -0.916692 |
| 6                | 5                | 0              | 1.199044                | -0.145125 | 0.927351  |
| 7                | 5                | 0              | 1.199044                | -0.145125 | -0.927351 |
| 8                | 1                | 0              | -1.585602               | 2.208893  | 0.000000  |
| 9                | 1                | 0              | -2.408401               | -0.235563 | 0.000000  |
| 10               | 1                | 0              | -0.758009               | 0.996298  | -2.369171 |
| 11               | 1                | 0              | 1.316942                | 2.357588  | 0.000000  |
| 12               | 1                | 0              | -0.912722               | -1.855599 | -1.687246 |
| 13               | 1                | 0              | 2.077355                | -0.068376 | 1.724660  |
| 14               | 1                | 0              | 2.077355                | -0.068376 | -1.724660 |
| 15               | 1                | 0              | 1.638300                | -2.572154 | -0.000000 |

|    |   |   |           |           |           |
|----|---|---|-----------|-----------|-----------|
| 16 | 5 | 0 | 1.010895  | -1.567689 | -0.000000 |
| 17 | 6 | 0 | -1.335639 | -0.081436 | 0.000000  |
| 18 | 5 | 0 | -0.354757 | 0.634905  | -1.317075 |
| 19 | 1 | 0 | -0.758009 | 0.996298  | 2.369171  |
| 20 | 1 | 0 | -0.912722 | -1.855599 | 1.687246  |

-----  
TSo/1

Standard orientation:

| Center<br>Number | Atomic<br>Number | Atomic<br>Type | Coordinates (Angstroms) |           |           |
|------------------|------------------|----------------|-------------------------|-----------|-----------|
|                  |                  |                | X                       | Y         | Z         |
| 1                | 6                | 0              | 1.146232                | -0.666904 | -1.317598 |
| 2                | 6                | 0              | 2.344204                | -1.168415 | -0.495311 |
| 3                | 5                | 0              | 0.458914                | -0.823463 | 0.119669  |
| 4                | 5                | 0              | 2.426042                | 0.350834  | -1.334817 |
| 5                | 5                | 0              | 0.783544                | 0.792582  | -0.709362 |
| 6                | 5                | 0              | 2.161886                | -0.905346 | 1.144224  |
| 7                | 5                | 0              | 3.397002                | 0.020653  | 0.155794  |
| 8                | 5                | 0              | 0.997669                | 0.565971  | 1.085758  |
| 9                | 5                | 0              | 2.253486                | 1.459366  | 0.058996  |
| 10               | 5                | 0              | 2.647665                | 0.663595  | 1.531032  |
| 11               | 1                | 0              | 0.831963                | -1.146709 | -2.233961 |
| 12               | 1                | 0              | 2.784495                | -2.094324 | -0.848217 |
| 13               | 1                | 0              | -0.079355               | -1.835183 | 0.412385  |
| 14               | 1                | 0              | 2.952983                | 0.533500  | -2.379816 |
| 15               | 1                | 0              | -0.019969               | 1.465862  | -1.262653 |
| 16               | 1                | 0              | 2.264055                | -1.840827 | 1.871220  |
| 17               | 1                | 0              | 4.564337                | -0.148457 | 0.005001  |
| 18               | 1                | 0              | 0.205144                | 0.993821  | 1.864749  |
| 19               | 1                | 0              | 2.465341                | 2.622295  | -0.080285 |
| 20               | 1                | 0              | 3.117548                | 1.115055  | 2.522149  |
| 21               | 6                | 0              | -1.979349               | -0.198780 | -0.160122 |
| 22               | 7                | 0              | -2.954634               | -1.053158 | 0.254589  |
| 23               | 7                | 0              | -2.683799               | 0.952084  | -0.331950 |
| 24               | 1                | 0              | -2.756006               | -2.014165 | 0.492650  |
| 25               | 1                | 0              | -2.233207               | 1.807527  | -0.624597 |
| 26               | 6                | 0              | -4.036505               | 0.828104  | -0.034996 |
| 27               | 6                | 0              | -4.212014               | -0.463844 | 0.342372  |
| 28               | 1                | 0              | -4.738271               | 1.643881  | -0.115321 |
| 29               | 1                | 0              | -5.096481               | -0.996693 | 0.655694  |

-----  
1

Standard orientation:

| Center<br>Number | Atomic<br>Number | Atomic<br>Type | Coordinates (Angstroms) |           |           |
|------------------|------------------|----------------|-------------------------|-----------|-----------|
|                  |                  |                | X                       | Y         | Z         |
| 1                | 6                | 0              | -0.782985               | -0.453294 | -1.241717 |
| 2                | 6                | 0              | -2.114869               | 0.312907  | -1.316732 |
| 3                | 5                | 0              | 0.174665                | 0.447516  | -0.273292 |
| 4                | 5                | 0              | -2.158296               | -1.251562 | -0.627474 |
| 5                | 5                | 0              | -0.694017               | -1.020824 | 0.341546  |

|    |   |   |           |           |           |
|----|---|---|-----------|-----------|-----------|
| 6  | 5 | 0 | -2.237006 | 1.440824  | -0.182534 |
| 7  | 5 | 0 | -3.311240 | -0.020957 | -0.065185 |
| 8  | 5 | 0 | -0.998860 | 0.455088  | 1.262818  |
| 9  | 5 | 0 | -2.262895 | -0.872844 | 1.120999  |
| 10 | 5 | 0 | -2.676598 | 0.819846  | 1.285289  |
| 11 | 1 | 0 | -0.435350 | -0.999455 | -2.115098 |
| 12 | 1 | 0 | -2.511153 | 0.464783  | -2.316136 |
| 13 | 1 | 0 | 0.094351  | 1.616526  | -0.543772 |
| 14 | 1 | 0 | -2.488941 | -2.231896 | -1.208581 |
| 15 | 1 | 0 | 0.057936  | -1.914167 | 0.594596  |
| 16 | 1 | 0 | -2.313790 | 2.595876  | -0.471640 |
| 17 | 1 | 0 | -4.446428 | -0.164187 | -0.394113 |
| 18 | 1 | 0 | -0.402378 | 0.789636  | 2.243338  |
| 19 | 1 | 0 | -2.572708 | -1.714714 | 1.905180  |
| 20 | 1 | 0 | -3.222238 | 1.341502  | 2.205016  |
| 21 | 6 | 0 | 1.732843  | 0.150244  | -0.093407 |
| 22 | 7 | 0 | 2.681643  | 1.106537  | -0.212777 |
| 23 | 7 | 0 | 2.433469  | -0.969755 | 0.187994  |
| 24 | 1 | 0 | 2.440208  | 2.066328  | -0.421726 |
| 25 | 1 | 0 | 1.966054  | -1.847900 | 0.376327  |
| 26 | 6 | 0 | 3.794199  | -0.723515 | 0.252145  |
| 27 | 6 | 0 | 3.953302  | 0.602795  | -0.001982 |
| 28 | 1 | 0 | 4.515457  | -1.495065 | 0.469297  |
| 29 | 1 | 0 | 4.839489  | 1.215009  | -0.049878 |

-----  
TS1/o-2

Standard orientation:

| Center<br>Number | Atomic<br>Number | Atomic<br>Type | Coordinates (Angstroms) |           |           |
|------------------|------------------|----------------|-------------------------|-----------|-----------|
|                  |                  |                | X                       | Y         | Z         |
| 1                | 6                | 0              | -1.076986               | 0.577219  | -1.286687 |
| 2                | 6                | 0              | 0.455337                | 0.442943  | -1.299058 |
| 3                | 5                | 0              | -1.714353               | -0.253923 | -0.041365 |
| 4                | 5                | 0              | -0.167034               | 1.997342  | -1.003558 |
| 5                | 5                | 0              | -1.503552               | 1.531815  | 0.075134  |
| 6                | 5                | 0              | 1.009596                | -0.290106 | 0.012108  |
| 7                | 5                | 0              | 1.313982                | 1.509906  | -0.164585 |
| 8                | 5                | 0              | -0.796950               | 0.663725  | 1.410070  |
| 9                | 5                | 0              | -0.025599               | 2.169941  | 0.771304  |
| 10               | 5                | 0              | 0.910114                | 0.767574  | 1.336699  |
| 11               | 1                | 0              | -1.571381               | 0.678542  | -2.250494 |
| 12               | 1                | 0              | 0.908492                | 0.274942  | -2.270093 |
| 13               | 1                | 0              | -1.164531               | -1.306977 | 0.141363  |
| 14               | 1                | 0              | -0.202686               | 2.834331  | -1.845418 |
| 15               | 1                | 0              | -2.541579               | 2.128335  | 0.035051  |
| 16               | 1                | 0              | 1.158412                | -1.464243 | 0.109131  |
| 17               | 1                | 0              | 2.325637                | 2.013963  | -0.528972 |
| 18               | 1                | 0              | -1.340845               | 0.526720  | 2.467593  |
| 19               | 1                | 0              | -0.028138               | 3.251622  | 1.273943  |
| 20               | 1                | 0              | 1.585581                | 0.761640  | 2.330630  |
| 21               | 6                | 0              | -3.274614               | -0.538047 | 0.015587  |
| 22               | 7                | 0              | -3.807542               | -1.762256 | 0.239291  |

|    |   |   |           |           |           |
|----|---|---|-----------|-----------|-----------|
| 23 | 7 | 0 | -4.353836 | 0.264084  | -0.126680 |
| 24 | 1 | 0 | -3.220940 | -2.572239 | 0.387981  |
| 25 | 1 | 0 | -4.247086 | 1.263655  | -0.248132 |
| 26 | 6 | 0 | -5.539827 | -0.437585 | 0.012857  |
| 27 | 6 | 0 | -5.192202 | -1.730487 | 0.247444  |
| 28 | 1 | 0 | -6.506870 | 0.033192  | -0.063396 |
| 29 | 1 | 0 | -5.795543 | -2.608089 | 0.415327  |
| 30 | 7 | 0 | 4.656004  | -1.126430 | -1.016506 |
| 31 | 7 | 0 | 4.069984  | -0.194319 | 0.779840  |
| 32 | 6 | 0 | 3.567225  | -0.540481 | -0.435795 |
| 33 | 6 | 0 | 5.785634  | -1.139591 | -0.200024 |
| 34 | 1 | 0 | 6.733172  | -1.558662 | -0.502666 |
| 35 | 6 | 0 | 5.402706  | -0.539314 | 0.955893  |
| 36 | 1 | 0 | 5.952756  | -0.334697 | 1.861645  |
| 37 | 1 | 0 | 3.480263  | 0.263298  | 1.466556  |
| 38 | 1 | 0 | 4.628363  | -1.502206 | -1.951990 |

o-2

Standard orientation:

| Center<br>Number | Atomic<br>Number | Atomic<br>Type | Coordinates (Angstroms) |           |           |
|------------------|------------------|----------------|-------------------------|-----------|-----------|
|                  |                  |                | X                       | Y         | Z         |
| 1                | 5                | 0              | 0.172213                | 0.127094  | 1.485086  |
| 2                | 5                | 0              | -1.633692               | 0.118691  | 1.394182  |
| 3                | 5                | 0              | -0.902875               | 1.598049  | -0.847444 |
| 4                | 5                | 0              | -2.330010               | 0.878900  | 0.000000  |
| 5                | 5                | 0              | 0.172213                | 0.127094  | -1.485086 |
| 6                | 5                | 0              | -2.088010               | -0.876821 | 0.000000  |
| 7                | 5                | 0              | -1.633692               | 0.118691  | -1.394182 |
| 8                | 6                | 0              | -0.579405               | -1.142917 | -0.764345 |
| 9                | 1                | 0              | -0.977534               | 2.566745  | 1.554178  |
| 10               | 1                | 0              | 1.196200                | 0.441961  | 0.934372  |
| 11               | 1                | 0              | -2.189443               | -0.123332 | 2.432362  |
| 12               | 1                | 0              | -0.977534               | 2.566745  | -1.554178 |
| 13               | 1                | 0              | -3.443770               | 1.310892  | 0.000000  |
| 14               | 1                | 0              | -0.571980               | -2.128660 | 1.224789  |
| 15               | 1                | 0              | 1.196200                | 0.441961  | -0.934372 |
| 16               | 1                | 0              | -2.894207               | -1.751584 | 0.000000  |
| 17               | 1                | 0              | -2.189443               | -0.123332 | -2.432362 |
| 18               | 1                | 0              | -0.571980               | -2.128660 | -1.224789 |
| 19               | 6                | 0              | 0.531164                | -0.018785 | -3.025803 |
| 20               | 7                | 0              | -0.214299               | -0.339542 | -4.108811 |
| 21               | 1                | 0              | -1.211367               | -0.494354 | -4.018308 |
| 22               | 6                | 0              | 0.528076                | -0.302638 | -5.277757 |
| 23               | 1                | 0              | 0.103639                | -0.522339 | -6.244383 |
| 24               | 7                | 0              | 1.763954                | 0.208458  | -3.540470 |
| 25               | 1                | 0              | 2.533552                | 0.485112  | -2.946831 |
| 26               | 6                | 0              | 1.790638                | 0.047124  | -4.916637 |
| 27               | 1                | 0              | 2.682311                | 0.191734  | -5.505288 |
| 28               | 6                | 0              | 0.531164                | -0.018785 | 3.025803  |
| 29               | 7                | 0              | -0.214299               | -0.339542 | 4.108811  |
| 30               | 1                | 0              | -1.211367               | -0.494354 | 4.018308  |

|    |   |   |           |           |          |
|----|---|---|-----------|-----------|----------|
| 31 | 6 | 0 | 0.528076  | -0.302638 | 5.277757 |
| 32 | 1 | 0 | 0.103639  | -0.522339 | 6.244383 |
| 33 | 7 | 0 | 1.763954  | 0.208458  | 3.540470 |
| 34 | 1 | 0 | 2.533552  | 0.485112  | 2.946831 |
| 35 | 6 | 0 | 1.790638  | 0.047124  | 4.916637 |
| 36 | 1 | 0 | 2.682311  | 0.191734  | 5.505288 |
| 37 | 6 | 0 | -0.579405 | -1.142917 | 0.764345 |
| 38 | 5 | 0 | -0.902875 | 1.598049  | 0.847444 |

TS1/2

Standard orientation:

| Center<br>Number | Atomic<br>Number | Atomic<br>Type | Coordinates (Angstroms) |           |           |
|------------------|------------------|----------------|-------------------------|-----------|-----------|
|                  |                  |                | X                       | Y         | Z         |
| 1                | 7                | 0              | -2.234570               | 0.702665  | 0.688418  |
| 2                | 1                | 0              | 4.121298                | -0.434116 | -0.843721 |
| 3                | 7                | 0              | -2.599549               | -0.818992 | -0.757380 |
| 4                | 1                | 0              | 2.955647                | -0.515751 | 2.369326  |
| 5                | 1                | 0              | 2.712914                | -2.444675 | 0.167567  |
| 6                | 6                | 0              | -1.599626               | -0.181342 | -0.108265 |
| 7                | 1                | 0              | 0.622107                | -1.968322 | 1.542019  |
| 8                | 1                | 0              | 1.136585                | -0.378289 | -2.770839 |
| 9                | 1                | 0              | -0.022684               | -1.384925 | -1.098440 |
| 10               | 6                | 0              | -3.607120               | 0.634205  | 0.538856  |
| 11               | 1                | 0              | -4.284941               | 1.264047  | 1.092511  |
| 12               | 1                | 0              | 2.938741                | 2.069421  | -1.792124 |
| 13               | 1                | 0              | -0.064216               | 2.092055  | -0.607543 |
| 14               | 1                | 0              | 2.625911                | 2.200775  | 1.175186  |
| 15               | 6                | 0              | -3.842723               | -0.335112 | -0.386275 |
| 16               | 1                | 0              | -4.763839               | -0.713592 | -0.799364 |
| 17               | 6                | 0              | 1.018291                | -1.212183 | 0.871431  |
| 18               | 6                | 0              | 2.263717                | -1.457884 | 0.137783  |
| 19               | 5                | 0              | -0.041837               | -0.462436 | -0.325911 |
| 20               | 1                | 0              | 0.140776                | 0.709807  | 2.069451  |
| 21               | 5                | 0              | 0.831250                | 0.384192  | 1.148144  |
| 22               | 5                | 0              | 0.739937                | 1.212508  | -0.490424 |
| 23               | 5                | 0              | 1.395915                | 0.106498  | -1.720464 |
| 24               | 5                | 0              | 2.349868                | 1.263857  | -1.142277 |
| 25               | 5                | 0              | 2.229401                | 1.271006  | 0.539873  |
| 26               | 5                | 0              | 2.972617                | -0.252259 | -0.569262 |
| 27               | 5                | 0              | 2.414070                | -0.356705 | 1.323925  |
| 28               | 1                | 0              | -2.415895               | -1.545301 | -1.436787 |
| 29               | 1                | 0              | -1.714915               | 1.343739  | 1.276300  |

2

Standard orientation:

| Center<br>Number | Atomic<br>Number | Atomic<br>Type | Coordinates (Angstroms) |           |           |
|------------------|------------------|----------------|-------------------------|-----------|-----------|
|                  |                  |                | X                       | Y         | Z         |
| 1                | 7                | 0              | -2.254925               | -0.953581 | 0.457234  |
| 2                | 1                | 0              | 4.174880                | 0.432856  | -0.944041 |

|    |   |   |           |           |           |
|----|---|---|-----------|-----------|-----------|
| 3  | 7 | 0 | -2.491022 | 0.879204  | -0.615836 |
| 4  | 1 | 0 | 2.881594  | -2.457310 | 0.400183  |
| 5  | 1 | 0 | 2.476164  | -1.316429 | -2.282149 |
| 6  | 6 | 0 | -1.554248 | 0.031499  | -0.142079 |
| 7  | 1 | 0 | 0.424915  | -2.065635 | -1.053329 |
| 8  | 1 | 0 | -0.001655 | 2.778032  | -0.475879 |
| 9  | 1 | 0 | 0.348662  | 0.950015  | -1.222106 |
| 10 | 6 | 0 | -3.619657 | -0.720077 | 0.381531  |
| 11 | 1 | 0 | -4.347829 | -1.389847 | 0.809727  |
| 12 | 1 | 0 | 2.925679  | 2.543027  | 0.711907  |
| 13 | 1 | 0 | 0.324555  | 1.247830  | 2.194894  |
| 14 | 1 | 0 | 3.197685  | 0.075677  | 2.082423  |
| 15 | 6 | 0 | -3.769394 | 0.444943  | -0.301993 |
| 16 | 1 | 0 | -4.654096 | 0.990525  | -0.588069 |
| 17 | 6 | 0 | 0.953814  | -1.182165 | -0.703533 |
| 18 | 6 | 0 | 2.194754  | -0.779214 | -1.381139 |
| 19 | 5 | 0 | 0.004932  | 0.198711  | -0.206074 |
| 20 | 1 | 0 | 0.388626  | -1.602962 | 1.662739  |
| 21 | 5 | 0 | 0.973536  | -0.847866 | 0.937463  |
| 22 | 5 | 0 | 0.861430  | 0.893136  | 1.188909  |
| 23 | 5 | 0 | 0.730965  | 1.841648  | -0.305548 |
| 24 | 5 | 0 | 2.241521  | 1.656239  | 0.295972  |
| 25 | 5 | 0 | 2.488658  | 0.124284  | 1.123692  |
| 26 | 5 | 0 | 3.043551  | 0.222377  | -0.625453 |
| 27 | 5 | 0 | 2.433296  | -1.385841 | 0.150126  |
| 28 | 1 | 0 | -2.242512 | 1.755987  | -1.057721 |
| 29 | 1 | 0 | -1.796089 | -1.704485 | 0.959480  |

-----  
TS2/o-1

Standard orientation:

| Center<br>Number | Atomic<br>Number | Atomic<br>Type | Coordinates (Angstroms) |           |           |
|------------------|------------------|----------------|-------------------------|-----------|-----------|
|                  |                  |                | X                       | Y         | Z         |
| 1                | 7                | 0              | -2.429639               | 0.985313  | -0.257043 |
| 2                | 1                | 0              | 4.232424                | 0.166765  | -1.000138 |
| 3                | 7                | 0              | -2.342380               | -1.110252 | 0.150226  |
| 4                | 1                | 0              | 2.886706                | -2.350295 | 0.827784  |
| 5                | 1                | 0              | 2.403826                | -1.681961 | -2.032779 |
| 6                | 6                | 0              | -1.560092               | -0.030182 | -0.081804 |
| 7                | 1                | 0              | 0.423497                | -2.196452 | -0.640358 |
| 8                | 1                | 0              | -0.117757               | 2.650523  | -0.802835 |
| 9                | 1                | 0              | 0.661879                | 0.921127  | -1.544886 |
| 10               | 6                | 0              | -3.738762               | 0.563969  | -0.124145 |
| 11               | 1                | 0              | -4.579088               | 1.231507  | -0.226997 |
| 12               | 1                | 0              | 2.958041                | 2.625592  | 0.045958  |
| 13               | 1                | 0              | 0.422239                | 1.715320  | 1.893025  |
| 14               | 1                | 0              | 3.285453                | 0.512812  | 1.953076  |
| 15               | 6                | 0              | -3.686439               | -0.770290 | 0.137604  |
| 16               | 1                | 0              | -4.469872               | -1.490772 | 0.309894  |
| 17               | 6                | 0              | 0.936209                | -1.254376 | -0.451786 |
| 18               | 6                | 0              | 2.178878                | -0.999483 | -1.217514 |
| 19               | 5                | 0              | -0.004510               | 0.130824  | -0.151402 |



|    |   |   |           |           |           |
|----|---|---|-----------|-----------|-----------|
| 20 | 1 | 0 | 0.502173  | -1.269767 | 2.021582  |
| 21 | 5 | 0 | 1.003651  | -0.654694 | 1.130060  |
| 22 | 5 | 0 | 0.884904  | 1.095787  | 0.984222  |
| 23 | 5 | 0 | 0.624980  | 1.715838  | -0.624378 |
| 24 | 5 | 0 | 2.219016  | 1.696112  | -0.062066 |
| 25 | 5 | 0 | 2.539738  | 0.341848  | 1.036817  |
| 26 | 5 | 0 | 3.107580  | 0.024325  | -0.633230 |
| 27 | 5 | 0 | 2.437726  | -1.333066 | 0.411064  |
| 28 | 1 | 0 | -1.966585 | -2.023349 | 0.366617  |
| 29 | 1 | 0 | -2.082993 | 1.920829  | -0.451792 |

o-l

Standard orientation:

| Center<br>Number | Atomic<br>Number | Atomic<br>Type | Coordinates (Angstroms) |           |           |
|------------------|------------------|----------------|-------------------------|-----------|-----------|
|                  |                  |                | X                       | Y         | Z         |
| 1                | 7                | 0              | -2.510665               | 0.942716  | -0.464746 |
| 2                | 1                | 0              | 4.341842                | 0.083522  | -0.757683 |
| 3                | 7                | 0              | -2.285949               | -1.024152 | 0.333591  |
| 4                | 1                | 0              | 2.703225                | -2.501162 | 0.610415  |
| 5                | 1                | 0              | 2.483645                | -1.515994 | -2.165418 |
| 6                | 6                | 0              | -1.571750               | 0.038029  | -0.108459 |
| 7                | 1                | 0              | 0.338670                | -1.960531 | -1.029929 |
| 8                | 1                | 0              | 0.100672                | 2.809130  | -0.684429 |
| 9                | 1                | 0              | 1.771416                | 1.671629  | -1.084560 |
| 10               | 6                | 0              | -3.791990               | 0.470091  | -0.236295 |
| 11               | 1                | 0              | -4.674521               | 1.050001  | -0.453428 |
| 12               | 1                | 0              | 2.984838                | 2.564422  | 0.306107  |
| 13               | 1                | 0              | 0.476376                | 1.516006  | 2.118856  |
| 14               | 1                | 0              | 3.169864                | 0.220317  | 2.071991  |
| 15               | 6                | 0              | -3.650140               | -0.782941 | 0.271253  |
| 16               | 1                | 0              | -4.384373               | -1.507988 | 0.583805  |
| 17               | 6                | 0              | 0.908483                | -1.095690 | -0.692225 |
| 18               | 6                | 0              | 2.226342                | -0.891197 | -1.314772 |
| 19               | 5                | 0              | -0.023345               | 0.244893  | -0.211697 |
| 20               | 1                | 0              | 0.306654                | -1.421494 | 1.760266  |
| 21               | 5                | 0              | 0.889479                | -0.726626 | 0.978405  |
| 22               | 5                | 0              | 0.914671                | 1.027392  | 1.122690  |
| 23               | 5                | 0              | 0.625984                | 1.760211  | -0.443532 |
| 24               | 5                | 0              | 2.257610                | 1.635597  | 0.151264  |
| 25               | 5                | 0              | 2.482258                | 0.133445  | 1.101971  |
| 26               | 5                | 0              | 3.179743                | -0.026823 | -0.522943 |
| 27               | 5                | 0              | 2.337510                | -1.424699 | 0.266567  |
| 28               | 1                | 0              | -1.839101               | -1.830670 | 0.750208  |
| 29               | 1                | 0              | -2.248130               | 1.846164  | -0.838753 |

p

Standard orientation:

| Center<br>Number | Atomic<br>Number | Atomic<br>Type | Coordinates (Angstroms) |   |   |
|------------------|------------------|----------------|-------------------------|---|---|
|                  |                  |                | X                       | Y | Z |

|    |   |   |           |           |           |
|----|---|---|-----------|-----------|-----------|
| 1  | 6 | 0 | 0.000000  | 0.000000  | 1.672727  |
| 2  | 5 | 0 | 0.000000  | 1.310868  | 0.753749  |
| 3  | 5 | 0 | -1.310868 | 0.000000  | 0.753749  |
| 4  | 5 | 0 | 0.926924  | -0.926924 | -0.753749 |
| 5  | 5 | 0 | -0.926924 | 0.926924  | -0.753749 |
| 6  | 5 | 0 | -0.926924 | -0.926924 | -0.753749 |
| 7  | 1 | 0 | 0.000000  | 0.000000  | 2.753953  |
| 8  | 1 | 0 | 2.387654  | -0.000000 | 1.249883  |
| 9  | 1 | 0 | -0.000000 | -2.387654 | 1.249883  |
| 10 | 1 | 0 | -2.387654 | -0.000000 | 1.249883  |
| 11 | 1 | 0 | 1.688326  | -1.688326 | -1.249883 |
| 12 | 1 | 0 | -1.688326 | 1.688326  | -1.249883 |
| 13 | 1 | 0 | -1.688326 | -1.688326 | -1.249883 |
| 14 | 1 | 0 | 0.000000  | 0.000000  | -2.753953 |
| 15 | 5 | 0 | -0.000000 | -1.310868 | 0.753749  |
| 16 | 1 | 0 | 0.000000  | 2.387654  | 1.249883  |
| 17 | 1 | 0 | 1.688326  | 1.688326  | -1.249883 |
| 18 | 5 | 0 | 1.310868  | -0.000000 | 0.753749  |
| 19 | 5 | 0 | 0.926924  | 0.926924  | -0.753749 |
| 20 | 6 | 0 | 0.000000  | 0.000000  | -1.672727 |

-----  
TSp/13

Standard orientation:

| Center<br>Number | Atomic<br>Number | Atomic<br>Type | Coordinates (Angstroms) |           |           |
|------------------|------------------|----------------|-------------------------|-----------|-----------|
|                  |                  |                | X                       | Y         | Z         |
| 1                | 6                | 0              | -1.045177               | -0.425277 | 1.454291  |
| 2                | 5                | 0              | -0.287548               | -0.794361 | 0.077736  |
| 3                | 5                | 0              | -2.426397               | 0.449857  | 1.282334  |
| 4                | 5                | 0              | -0.793806               | 0.956002  | 0.680520  |
| 5                | 5                | 0              | -1.910288               | -1.072529 | -1.029021 |
| 6                | 5                | 0              | -3.267990               | -0.149347 | -0.182665 |
| 7                | 5                | 0              | -2.243651               | 1.401407  | -0.244563 |
| 8                | 1                | 0              | -0.665807               | -0.649938 | 2.443793  |
| 9                | 1                | 0              | -2.624477               | -2.252382 | 1.235511  |
| 10               | 1                | 0              | 0.230528                | -1.867510 | -0.074361 |
| 11               | 1                | 0              | -2.971728               | 0.850733  | 2.257714  |
| 12               | 1                | 0              | -0.059480               | 1.782843  | 1.123794  |
| 13               | 1                | 0              | -1.933830               | -1.977866 | -1.798320 |
| 14               | 1                | 0              | -4.443281               | -0.304041 | -0.272321 |
| 15               | 1                | 0              | -0.144252               | 0.918897  | -1.921892 |
| 16               | 1                | 0              | -2.565316               | 2.536708  | -0.384435 |
| 17               | 1                | 0              | -2.848623               | 0.631488  | -2.421603 |
| 18               | 6                | 0              | 1.787120                | -0.111916 | 0.091272  |
| 19               | 7                | 0              | 2.713460                | -1.060496 | -0.177708 |
| 20               | 7                | 0              | 2.540253                | 1.011790  | 0.190197  |
| 21               | 1                | 0              | 2.445870                | -2.026224 | -0.318771 |
| 22               | 1                | 0              | 2.125222                | 1.912426  | 0.385257  |
| 23               | 6                | 0              | 3.894869                | 0.776003  | -0.011800 |
| 24               | 6                | 0              | 4.005674                | -0.557412 | -0.248640 |
| 25               | 1                | 0              | 4.643374                | 1.552237  | 0.030348  |
| 26               | 1                | 0              | 4.869174                | -1.170593 | -0.454624 |

|    |   |   |           |           |           |
|----|---|---|-----------|-----------|-----------|
| 27 | 5 | 0 | -2.208148 | -1.258268 | 0.731350  |
| 28 | 6 | 0 | -2.432060 | 0.357970  | -1.461713 |
| 29 | 5 | 0 | -0.881356 | 0.500829  | -1.087286 |

13

Standard orientation:

| Center<br>Number | Atomic<br>Number | Atomic<br>Type | Coordinates (Angstroms) |           |           |
|------------------|------------------|----------------|-------------------------|-----------|-----------|
|                  |                  |                | X                       | Y         | Z         |
| 1                | 6                | 0              | 0.807510                | -0.315423 | 1.351522  |
| 2                | 5                | 0              | -0.136824               | 0.511471  | 0.257143  |
| 3                | 5                | 0              | 2.195525                | -1.140387 | 0.845509  |
| 4                | 5                | 0              | 0.693122                | -1.097850 | -0.094833 |
| 5                | 5                | 0              | 2.224530                | 1.494652  | -0.081994 |
| 6                | 5                | 0              | 3.265810                | 0.016185  | 0.083365  |
| 7                | 5                | 0              | 2.209218                | -1.019270 | -0.968601 |
| 8                | 1                | 0              | 0.378513                | -0.746672 | 2.253598  |
| 9                | 1                | 0              | 2.610309                | 0.921195  | 2.446695  |
| 10               | 1                | 0              | -0.165364               | 1.700778  | 0.460286  |
| 11               | 1                | 0              | 2.536932                | -2.100778 | 1.456772  |
| 12               | 1                | 0              | -0.046640               | -2.026231 | -0.237808 |
| 13               | 1                | 0              | 2.304757                | 2.678444  | -0.177335 |
| 14               | 1                | 0              | 4.454562                | 0.026536  | 0.131233  |
| 15               | 1                | 0              | 0.357863                | 0.351056  | -2.327329 |
| 16               | 1                | 0              | 2.567084                | -1.865645 | -1.721698 |
| 17               | 1                | 0              | 2.989795                | 0.842431  | -2.210973 |
| 18               | 6                | 0              | -1.706283               | 0.164380  | 0.075552  |
| 19               | 7                | 0              | -2.663168               | 1.117034  | 0.147481  |
| 20               | 7                | 0              | -2.401255               | -0.973978 | -0.142468 |
| 21               | 1                | 0              | -2.423514               | 2.085607  | 0.315286  |
| 22               | 1                | 0              | -1.929490               | -1.861627 | -0.262518 |
| 23               | 6                | 0              | -3.764512               | -0.742552 | -0.210718 |
| 24               | 6                | 0              | -3.932196               | 0.594485  | -0.027593 |
| 25               | 1                | 0              | -4.481342               | -1.530303 | -0.379517 |
| 26               | 1                | 0              | -4.823031               | 1.201471  | -0.005180 |
| 27               | 5                | 0              | 2.165761                | 0.569146  | 1.395658  |
| 28               | 6                | 0              | 2.506722                | 0.563061  | -1.281576 |
| 29               | 5                | 0              | 0.913477                | 0.213781  | -1.280192 |

TS13/p-2

Standard orientation:

| Center<br>Number | Atomic<br>Number | Atomic<br>Type | Coordinates (Angstroms) |           |           |
|------------------|------------------|----------------|-------------------------|-----------|-----------|
|                  |                  |                | X                       | Y         | Z         |
| 1                | 6                | 0              | -1.018247               | 0.715641  | -1.220504 |
| 2                | 5                | 0              | -1.663777               | -0.220656 | -0.001937 |
| 3                | 5                | 0              | -0.139592               | 2.129012  | -0.812073 |
| 4                | 5                | 0              | -1.505533               | 1.565808  | 0.172746  |
| 5                | 5                | 0              | 1.151127                | -0.275437 | 0.076520  |
| 6                | 5                | 0              | 1.275020                | 1.519412  | -0.017746 |
| 7                | 5                | 0              | -0.064498               | 2.101090  | 0.984801  |

|    |   |   |           |           |           |
|----|---|---|-----------|-----------|-----------|
| 8  | 1 | 0 | -1.597423 | 0.845754  | -2.134288 |
| 9  | 1 | 0 | 1.102982  | 0.552943  | -2.447468 |
| 10 | 1 | 0 | -1.117454 | -1.289490 | 0.112189  |
| 11 | 1 | 0 | -0.224321 | 3.118086  | -1.469103 |
| 12 | 1 | 0 | -2.545454 | 2.162267  | 0.188703  |
| 13 | 1 | 0 | 0.984569  | -1.458030 | 0.078955  |
| 14 | 1 | 0 | 2.348632  | 2.044304  | 0.000004  |
| 15 | 1 | 0 | -1.382722 | 0.504358  | 2.572148  |
| 16 | 1 | 0 | 0.046646  | 3.056306  | 1.685670  |
| 17 | 1 | 0 | 1.316661  | 0.636147  | 2.254231  |
| 18 | 6 | 0 | -3.218165 | -0.530150 | -0.029184 |
| 19 | 7 | 0 | -3.746697 | -1.773630 | 0.083139  |
| 20 | 7 | 0 | -4.302455 | 0.265942  | -0.185310 |
| 21 | 1 | 0 | -3.155240 | -2.584360 | 0.201848  |
| 22 | 1 | 0 | -4.202497 | 1.271419  | -0.247293 |
| 23 | 6 | 0 | -5.483763 | -0.457927 | -0.161880 |
| 24 | 6 | 0 | -5.130595 | -1.758535 | 0.010423  |
| 25 | 1 | 0 | -6.452051 | 0.004680  | -0.267382 |
| 26 | 1 | 0 | -5.729345 | -2.652199 | 0.083390  |
| 27 | 5 | 0 | 0.593915  | 0.608439  | -1.366271 |
| 28 | 6 | 0 | 0.730783  | 0.632866  | 1.338627  |
| 29 | 5 | 0 | -0.882782 | 0.605563  | 1.490779  |
| 30 | 6 | 0 | 3.434657  | -0.545796 | 0.027539  |
| 31 | 7 | 0 | 4.090638  | -1.730086 | 0.076605  |
| 32 | 1 | 0 | 3.600990  | -2.606125 | 0.188014  |
| 33 | 6 | 0 | 5.468034  | -1.588901 | -0.056211 |
| 34 | 1 | 0 | 6.152061  | -2.423070 | -0.041064 |
| 35 | 7 | 0 | 4.437842  | 0.344553  | -0.137204 |
| 36 | 1 | 0 | 4.242913  | 1.333931  | -0.222033 |
| 37 | 6 | 0 | 5.689213  | -0.255635 | -0.193563 |
| 38 | 1 | 0 | 6.604847  | 0.300098  | -0.322700 |

p-2

Standard orientation:

| Center<br>Number | Atomic<br>Number | Atomic<br>Type | Coordinates (Angstroms) |           |           |
|------------------|------------------|----------------|-------------------------|-----------|-----------|
|                  |                  |                | X                       | Y         | Z         |
| 1                | 6                | 0              | -1.260386               | -0.892096 | 0.743139  |
| 2                | 5                | 0              | 0.006634                | -1.491014 | -0.170949 |
| 3                | 5                | 0              | 0.130815                | -1.381770 | 1.619439  |
| 4                | 5                | 0              | -1.461731               | 0.704767  | 0.704026  |
| 5                | 5                | 0              | -0.889288               | -0.059528 | 2.205038  |
| 6                | 5                | 0              | 1.461731                | -0.704767 | 0.704026  |
| 7                | 5                | 0              | -0.006634               | 1.491014  | -0.170949 |
| 8                | 5                | 0              | 0.889288                | 0.059528  | 2.205038  |
| 9                | 5                | 0              | -0.130815               | 1.381770  | 1.619439  |
| 10               | 6                | 0              | 1.260386                | 0.892096  | 0.743139  |
| 11               | 1                | 0              | -2.154861               | -1.507711 | 0.833985  |
| 12               | 1                | 0              | 0.144099                | -0.903349 | -1.216654 |
| 13               | 1                | 0              | 0.143683                | -2.435346 | 2.194481  |
| 14               | 1                | 0              | -2.554051               | 1.192353  | 0.655826  |
| 15               | 1                | 0              | -1.562524               | -0.177358 | 3.180070  |

|    |   |   |           |           |           |
|----|---|---|-----------|-----------|-----------|
| 16 | 1 | 0 | 2.554051  | -1.192353 | 0.655826  |
| 17 | 1 | 0 | -0.144099 | 0.903349  | -1.216654 |
| 18 | 1 | 0 | 1.562524  | 0.177358  | 3.180070  |
| 19 | 1 | 0 | -0.143683 | 2.435346  | 2.194481  |
| 20 | 1 | 0 | 2.154861  | 1.507711  | 0.833985  |
| 21 | 6 | 0 | -0.002723 | 3.033633  | -0.525580 |
| 22 | 7 | 0 | 0.152515  | 4.140559  | 0.239894  |
| 23 | 1 | 0 | 0.235903  | 4.064217  | 1.246072  |
| 24 | 6 | 0 | 0.090351  | 5.303097  | -0.511404 |
| 25 | 1 | 0 | 0.188529  | 6.284210  | -0.074896 |
| 26 | 7 | 0 | -0.152515 | 3.530269  | -1.779197 |
| 27 | 1 | 0 | -0.284255 | 2.917333  | -2.571375 |
| 28 | 6 | 0 | -0.105142 | 4.915580  | -1.798785 |
| 29 | 1 | 0 | -0.209759 | 5.491299  | -2.704382 |
| 30 | 6 | 0 | 0.002723  | -3.033633 | -0.525580 |
| 31 | 7 | 0 | -0.152515 | -4.140559 | 0.239894  |
| 32 | 1 | 0 | -0.235903 | -4.064217 | 1.246072  |
| 33 | 6 | 0 | -0.090351 | -5.303097 | -0.511404 |
| 34 | 1 | 0 | -0.188529 | -6.284210 | -0.074896 |
| 35 | 7 | 0 | 0.152515  | -3.530269 | -1.779197 |
| 36 | 1 | 0 | 0.284255  | -2.917333 | -2.571375 |
| 37 | 6 | 0 | 0.105142  | -4.915580 | -1.798785 |
| 38 | 1 | 0 | 0.209759  | -5.491299 | -2.704382 |

-----  
TSo-2/3

Standard orientation:

| Center<br>Number | Atomic<br>Number | Atomic<br>Type | Coordinates (Angstroms) |           |           |
|------------------|------------------|----------------|-------------------------|-----------|-----------|
|                  |                  |                | X                       | Y         | Z         |
| 1                | 5                | 0              | -1.680448               | 0.337585  | -0.118186 |
| 2                | 5                | 0              | -1.425025               | 2.014701  | 0.304857  |
| 3                | 5                | 0              | 1.032290                | 0.661642  | 1.319998  |
| 4                | 5                | 0              | 0.183593                | 2.166613  | 1.095642  |
| 5                | 5                | 0              | 1.361267                | -0.263540 | -0.227698 |
| 6                | 5                | 0              | 0.012422                | 2.291792  | -0.800498 |
| 7                | 5                | 0              | 1.566447                | 1.954761  | 0.072681  |
| 8                | 6                | 0              | 1.249958                | 1.051124  | -1.142813 |
| 9                | 1                | 0              | -1.385157               | 0.461104  | 2.435825  |
| 10               | 1                | 0              | -0.760088               | -0.299487 | 0.594055  |
| 11               | 1                | 0              | -2.262823               | 2.842092  | 0.490756  |
| 12               | 1                | 0              | 1.594042                | 0.489733  | 2.370244  |
| 13               | 1                | 0              | 0.204887                | 3.044884  | 1.905297  |
| 14               | 1                | 0              | -1.703979               | 1.519163  | -2.089656 |
| 15               | 1                | 0              | 0.682493                | -1.277741 | -0.455807 |
| 16               | 1                | 0              | 0.081878                | 3.312138  | -1.419145 |
| 17               | 1                | 0              | 2.372047                | 2.855212  | 0.111477  |
| 18               | 1                | 0              | 1.552713                | 1.181942  | -2.184099 |
| 19               | 6                | 0              | 2.871406                | -0.729042 | -0.170095 |
| 20               | 7                | 0              | 4.002845                | 0.015676  | -0.078061 |
| 21               | 1                | 0              | 3.954641                | 1.026922  | -0.039876 |
| 22               | 6                | 0              | 5.134466                | -0.775716 | 0.048523  |
| 23               | 1                | 0              | 6.125824                | -0.362185 | 0.144351  |

|    |   |   |           |           |           |
|----|---|---|-----------|-----------|-----------|
| 24 | 7 | 0 | 3.325777  | -2.006713 | -0.125263 |
| 25 | 1 | 0 | 2.687812  | -2.787611 | -0.174654 |
| 26 | 6 | 0 | 4.707403  | -2.063909 | 0.018212  |
| 27 | 1 | 0 | 5.250895  | -2.992998 | 0.081642  |
| 28 | 6 | 0 | -3.031610 | -0.419209 | -0.095143 |
| 29 | 7 | 0 | -3.858832 | -0.756912 | -1.114880 |
| 30 | 1 | 0 | -3.652511 | -0.531005 | -2.077620 |
| 31 | 6 | 0 | -4.975192 | -1.441069 | -0.655798 |
| 32 | 1 | 0 | -5.751915 | -1.793734 | -1.315002 |
| 33 | 7 | 0 | -3.643165 | -0.911312 | 1.009156  |
| 34 | 1 | 0 | -3.250504 | -0.762192 | 1.931715  |
| 35 | 6 | 0 | -4.836902 | -1.536979 | 0.692763  |
| 36 | 1 | 0 | -5.472200 | -1.988515 | 1.437635  |
| 37 | 6 | 0 | -1.161922 | 1.276639  | -1.176483 |
| 38 | 5 | 0 | -0.810559 | 0.737660  | 1.413446  |

3

Standard orientation:

| Center<br>Number | Atomic<br>Number | Atomic<br>Type | Coordinates (Angstroms) |           |           |
|------------------|------------------|----------------|-------------------------|-----------|-----------|
|                  |                  |                | X                       | Y         | Z         |
| 1                | 5                | 0              | -1.717833               | 0.345713  | -0.139525 |
| 2                | 5                | 0              | -1.421041               | 1.999562  | 0.389281  |
| 3                | 5                | 0              | 1.047654                | 0.564930  | 1.284472  |
| 4                | 5                | 0              | 0.175038                | 2.055927  | 1.200119  |
| 5                | 5                | 0              | 1.416262                | -0.228476 | -0.315317 |
| 6                | 5                | 0              | -0.011634               | 2.256194  | -0.820564 |
| 7                | 5                | 0              | 1.559265                | 2.062887  | 0.153955  |
| 8                | 6                | 0              | 1.399884                | 1.190742  | -1.078341 |
| 9                | 1                | 0              | -1.373684               | 0.245920  | 2.388161  |
| 10               | 1                | 0              | -0.748718               | -0.331947 | 0.486102  |
| 11               | 1                | 0              | -2.246770               | 2.807744  | 0.685043  |
| 12               | 1                | 0              | 1.621216                | 0.343285  | 2.320089  |
| 13               | 1                | 0              | 0.163933                | 2.854344  | 2.090318  |
| 14               | 1                | 0              | -1.907573               | 1.700112  | -1.968847 |
| 15               | 1                | 0              | 0.732829                | -1.193781 | -0.675953 |
| 16               | 1                | 0              | 0.039985                | 3.333987  | -1.340558 |
| 17               | 1                | 0              | 2.240611                | 3.047747  | 0.300607  |
| 18               | 1                | 0              | 1.801920                | 1.403511  | -2.075385 |
| 19               | 6                | 0              | 2.910997                | -0.725469 | -0.222256 |
| 20               | 7                | 0              | 4.045447                | 0.009236  | -0.082035 |
| 21               | 1                | 0              | 4.005646                | 1.019912  | -0.041682 |
| 22               | 6                | 0              | 5.168388                | -0.791722 | 0.064748  |
| 23               | 1                | 0              | 6.159053                | -0.386907 | 0.197774  |
| 24               | 7                | 0              | 3.358065                | -2.007501 | -0.188883 |
| 25               | 1                | 0              | 2.720368                | -2.784916 | -0.276040 |
| 26               | 6                | 0              | 4.734576                | -2.075864 | -0.003904 |
| 27               | 1                | 0              | 5.270803                | -3.009387 | 0.056881  |
| 28               | 6                | 0              | -3.072031               | -0.423219 | -0.103682 |
| 29               | 7                | 0              | -3.931586               | -0.687679 | -1.113813 |
| 30               | 1                | 0              | -3.753290               | -0.393292 | -2.064365 |
| 31               | 6                | 0              | -5.034489               | -1.397781 | -0.666334 |

|    |   |   |           |           |           |
|----|---|---|-----------|-----------|-----------|
| 32 | 1 | 0 | -5.835274 | -1.701991 | -1.320919 |
| 33 | 7 | 0 | -3.644593 | -0.985850 | 0.983427  |
| 34 | 1 | 0 | -3.216722 | -0.898086 | 1.898997  |
| 35 | 6 | 0 | -4.850336 | -1.586298 | 0.668215  |
| 36 | 1 | 0 | -5.461880 | -2.085734 | 1.402348  |
| 37 | 6 | 0 | -1.275977 | 1.361958  | -1.147813 |
| 38 | 5 | 0 | -0.825681 | 0.626856  | 1.384132  |

-----

TS3/4

Standard orientation:

| Center<br>Number | Atomic<br>Number | Atomic<br>Type | Coordinates (Angstroms) |           |           |
|------------------|------------------|----------------|-------------------------|-----------|-----------|
|                  |                  |                | X                       | Y         | Z         |
| 1                | 5                | 0              | -1.733606               | 0.308290  | -0.154283 |
| 2                | 5                | 0              | -1.384769               | 1.941742  | 0.441080  |
| 3                | 5                | 0              | 1.061168                | 0.466847  | 1.279212  |
| 4                | 5                | 0              | 0.159258                | 1.924420  | 1.347751  |
| 5                | 5                | 0              | 1.465704                | -0.215701 | -0.353561 |
| 6                | 5                | 0              | -0.006901               | 2.181774  | -0.924158 |
| 7                | 5                | 0              | 1.491828                | 2.114907  | 0.266636  |
| 8                | 6                | 0              | 1.458279                | 1.269405  | -0.994891 |
| 9                | 1                | 0              | -1.379217               | 0.031947  | 2.332128  |
| 10               | 1                | 0              | -0.764874               | -0.409005 | 0.392291  |
| 11               | 1                | 0              | -2.220157               | 2.726714  | 0.772970  |
| 12               | 1                | 0              | 1.681940                | 0.225760  | 2.283657  |
| 13               | 1                | 0              | 0.110851                | 2.621493  | 2.319188  |
| 14               | 1                | 0              | -2.019633               | 1.767409  | -1.864202 |
| 15               | 1                | 0              | 0.794179                | -1.145413 | -0.802159 |
| 16               | 1                | 0              | 0.029209                | 3.289975  | -1.380402 |
| 17               | 1                | 0              | 2.090373                | 3.141149  | 0.466543  |
| 18               | 1                | 0              | 1.982246                | 1.555332  | -1.916969 |
| 19               | 6                | 0              | 2.959695                | -0.709495 | -0.255415 |
| 20               | 7                | 0              | 4.081287                | 0.038932  | -0.086096 |
| 21               | 1                | 0              | 4.026529                | 1.048093  | -0.035011 |
| 22               | 6                | 0              | 5.215560                | -0.747303 | 0.054171  |
| 23               | 1                | 0              | 6.198564                | -0.330656 | 0.206078  |
| 24               | 7                | 0              | 3.426881                | -1.985213 | -0.245789 |
| 25               | 1                | 0              | 2.804480                | -2.771644 | -0.357973 |
| 26               | 6                | 0              | 4.802272                | -2.036005 | -0.048224 |
| 27               | 1                | 0              | 5.352799                | -2.962128 | -0.003905 |
| 28               | 6                | 0              | -3.110397               | -0.426270 | -0.111220 |
| 29               | 7                | 0              | -4.014631               | -0.577707 | -1.104226 |
| 30               | 1                | 0              | -3.858232               | -0.211963 | -2.033903 |
| 31               | 6                | 0              | -5.126830               | -1.282395 | -0.672517 |
| 32               | 1                | 0              | -5.962268               | -1.503399 | -1.317091 |
| 33               | 7                | 0              | -3.662850               | -1.054960 | 0.948530  |
| 34               | 1                | 0              | -3.202198               | -1.048874 | 1.852404  |
| 35               | 6                | 0              | -4.900891               | -1.585804 | 0.634408  |
| 36               | 1                | 0              | -5.503555               | -2.121623 | 1.350020  |
| 37               | 6                | 0              | -1.314502               | 1.361654  | -1.136883 |
| 38               | 5                | 0              | -0.827673               | 0.495070  | 1.363886  |

-----

Standard orientation:

| Center<br>Number | Atomic<br>Number | Atomic<br>Type | Coordinates (Angstroms) |           |           |
|------------------|------------------|----------------|-------------------------|-----------|-----------|
|                  |                  |                | X                       | Y         | Z         |
| 1                | 5                | 0              | -1.404060               | 0.165579  | -0.437757 |
| 2                | 5                | 0              | -0.945963               | 1.067483  | 1.096100  |
| 3                | 5                | 0              | 1.615663                | 1.903192  | 0.018154  |
| 4                | 5                | 0              | 0.685384                | 1.289553  | 1.416816  |
| 5                | 5                | 0              | 1.279953                | -0.034787 | -0.695649 |
| 6                | 5                | 0              | -0.235011               | 2.126015  | -1.501380 |
| 7                | 5                | 0              | -0.119796               | 2.534491  | 0.680668  |
| 8                | 6                | 0              | 1.205407                | 1.612977  | -1.411074 |
| 9                | 1                | 0              | 0.099872                | -1.254851 | 1.292277  |
| 10               | 1                | 0              | -1.166542               | -0.253240 | -1.552695 |
| 11               | 1                | 0              | -1.796288               | 1.036717  | 1.943957  |
| 12               | 1                | 0              | 2.732322                | 2.225984  | 0.315744  |
| 13               | 1                | 0              | 1.243705                | 1.362654  | 2.477332  |
| 14               | 1                | 0              | -2.190966               | 2.473386  | -0.419325 |
| 15               | 1                | 0              | 1.046683                | -0.624506 | -1.740134 |
| 16               | 1                | 0              | -0.580509               | 2.874001  | -2.377007 |
| 17               | 1                | 0              | -0.163915               | 3.705345  | 0.898451  |
| 18               | 1                | 0              | 1.901867                | 1.760831  | -2.235729 |
| 19               | 6                | 0              | 2.717697                | -0.577516 | -0.239454 |
| 20               | 7                | 0              | 3.310409                | -0.520809 | 0.975126  |
| 21               | 1                | 0              | 2.874828                | -0.002451 | 1.731885  |
| 22               | 6                | 0              | 4.474651                | -1.265378 | 1.019110  |
| 23               | 1                | 0              | 5.084726                | -1.341099 | 1.905122  |
| 24               | 7                | 0              | 3.542528                | -1.373401 | -0.962843 |
| 25               | 1                | 0              | 3.330803                | -1.616016 | -1.920286 |
| 26               | 6                | 0              | 4.626841                | -1.812702 | -0.216125 |
| 27               | 1                | 0              | 5.391411                | -2.458305 | -0.617607 |
| 28               | 6                | 0              | -2.836673               | -0.465995 | -0.119845 |
| 29               | 7                | 0              | -3.451052               | -1.340647 | -0.953008 |
| 30               | 1                | 0              | -3.023288               | -1.603579 | -1.830671 |
| 31               | 6                | 0              | -4.655453               | -1.791804 | -0.439390 |
| 32               | 1                | 0              | -5.285814               | -2.496348 | -0.957881 |
| 33               | 7                | 0              | -3.691775               | -0.366700 | 0.925450  |
| 34               | 1                | 0              | -3.455657               | 0.197866  | 1.732203  |
| 35               | 6                | 0              | -4.808260               | -1.169010 | 0.759182  |
| 36               | 1                | 0              | -5.599009               | -1.225310 | 1.490328  |
| 37               | 6                | 0              | -1.280519               | 1.880141  | -0.351959 |
| 38               | 5                | 0              | 0.108401                | -0.254414 | 0.616707  |

TS4/5

Standard orientation:

| Center<br>Number | Atomic<br>Number | Atomic<br>Type | Coordinates (Angstroms) |          |           |
|------------------|------------------|----------------|-------------------------|----------|-----------|
|                  |                  |                | X                       | Y        | Z         |
| 1                | 5                | 0              | 1.422860                | 0.176729 | 0.457509  |
| 2                | 5                | 0              | 0.941383                | 1.010984 | -1.145242 |



|    |   |   |           |           |           |
|----|---|---|-----------|-----------|-----------|
| 3  | 5 | 0 | -1.612956 | 1.940664  | -0.025397 |
| 4  | 5 | 0 | -0.709083 | 1.081675  | -1.390474 |
| 5  | 5 | 0 | -1.290290 | 0.024185  | 0.606455  |
| 6  | 5 | 0 | 0.199601  | 2.261089  | 1.344207  |
| 7  | 5 | 0 | 0.049792  | 2.447417  | -0.809508 |
| 8  | 6 | 0 | -1.208278 | 1.658431  | 1.395777  |
| 9  | 1 | 0 | -0.008415 | -1.392504 | -1.177499 |
| 10 | 1 | 0 | 1.224697  | -0.136046 | 1.618053  |
| 11 | 1 | 0 | 1.774823  | 0.966149  | -2.008207 |
| 12 | 1 | 0 | -2.718648 | 2.262606  | -0.359450 |
| 13 | 1 | 0 | -1.358914 | 1.037133  | -2.399585 |
| 14 | 1 | 0 | 2.152746  | 2.517779  | 0.256385  |
| 15 | 1 | 0 | -1.049719 | -0.439988 | 1.710282  |
| 16 | 1 | 0 | 0.481662  | 3.163039  | 2.087854  |
| 17 | 1 | 0 | 0.086860  | 3.569066  | -1.209391 |
| 18 | 1 | 0 | -1.884781 | 1.791403  | 2.237000  |
| 19 | 6 | 0 | -2.720886 | -0.567723 | 0.215485  |
| 20 | 7 | 0 | -3.299381 | -0.652147 | -1.003115 |
| 21 | 1 | 0 | -2.851608 | -0.228757 | -1.809974 |
| 22 | 6 | 0 | -4.484356 | -1.363672 | -0.965435 |
| 23 | 1 | 0 | -5.088331 | -1.536320 | -1.841916 |
| 24 | 7 | 0 | -3.572462 | -1.242450 | 1.025574  |
| 25 | 1 | 0 | -3.379546 | -1.366483 | 2.009340  |
| 26 | 6 | 0 | -4.662632 | -1.743092 | 0.327801  |
| 27 | 1 | 0 | -5.448577 | -2.310688 | 0.799581  |
| 28 | 6 | 0 | 2.857635  | -0.450611 | 0.154183  |
| 29 | 7 | 0 | 3.515782  | -1.241866 | 1.036609  |
| 30 | 1 | 0 | 3.121649  | -1.435583 | 1.947186  |
| 31 | 6 | 0 | 4.711048  | -1.716516 | 0.521491  |
| 32 | 1 | 0 | 5.371136  | -2.364376 | 1.075698  |
| 33 | 7 | 0 | 3.677747  | -0.425640 | -0.923878 |
| 34 | 1 | 0 | 3.408059  | 0.069765  | -1.764634 |
| 35 | 6 | 0 | 4.813865  | -1.193998 | -0.728840 |
| 36 | 1 | 0 | 5.582459  | -1.297682 | -1.478203 |
| 37 | 6 | 0 | 1.260298  | 1.894472  | 0.251113  |
| 38 | 5 | 0 | -0.014811 | -0.350250 | -0.571208 |

5

Standard orientation:

| Center<br>Number | Atomic<br>Number | Atomic<br>Type | Coordinates (Angstroms) |           |           |
|------------------|------------------|----------------|-------------------------|-----------|-----------|
|                  |                  |                | X                       | Y         | Z         |
| 1                | 5                | 0              | -1.529480               | 0.141889  | -0.491532 |
| 2                | 5                | 0              | -0.950867               | 0.750065  | 1.109407  |
| 3                | 5                | 0              | 1.455825                | 2.108359  | 0.223388  |
| 4                | 5                | 0              | 0.810561                | 0.812523  | 1.344229  |
| 5                | 5                | 0              | 1.561610                | 0.345204  | -0.149225 |
| 6                | 5                | 0              | 0.013967                | 2.323626  | -0.949266 |
| 7                | 5                | 0              | -0.122646               | 2.285982  | 0.919919  |
| 8                | 6                | 0              | 1.217373                | 1.360368  | -1.235530 |
| 9                | 1                | 0              | -0.003551               | -1.495380 | 1.490557  |
| 10               | 1                | 0              | -1.167700               | -0.207155 | -1.582994 |

|    |   |   |           |           |           |
|----|---|---|-----------|-----------|-----------|
| 11 | 1 | 0 | -1.709305 | 0.618770  | 2.033930  |
| 12 | 1 | 0 | 2.375604  | 2.801793  | 0.549134  |
| 13 | 1 | 0 | 1.275768  | 0.642836  | 2.432517  |
| 14 | 1 | 0 | -2.187717 | 2.368794  | -0.085488 |
| 15 | 1 | 0 | 0.333924  | -1.220173 | -0.417744 |
| 16 | 1 | 0 | -0.111508 | 3.357277  | -1.546397 |
| 17 | 1 | 0 | -0.410972 | 3.157756  | 1.681582  |
| 18 | 1 | 0 | 1.878670  | 1.555381  | -2.081641 |
| 19 | 6 | 0 | 2.909970  | -0.442047 | -0.106494 |
| 20 | 7 | 0 | 3.156348  | -1.574830 | 0.585704  |
| 21 | 1 | 0 | 2.434137  | -2.001354 | 1.155017  |
| 22 | 6 | 0 | 4.466758  | -1.994835 | 0.424231  |
| 23 | 1 | 0 | 4.857800  | -2.880384 | 0.898687  |
| 24 | 7 | 0 | 4.081701  | -0.157572 | -0.717796 |
| 25 | 1 | 0 | 4.195285  | 0.665923  | -1.293361 |
| 26 | 6 | 0 | 5.057261  | -1.091728 | -0.402907 |
| 27 | 1 | 0 | 6.063418  | -1.034203 | -0.785935 |
| 28 | 6 | 0 | -2.994430 | -0.426717 | -0.264351 |
| 29 | 7 | 0 | -3.685189 | -1.161146 | -1.168035 |
| 30 | 1 | 0 | -3.288030 | -1.391781 | -2.068483 |
| 31 | 6 | 0 | -4.941319 | -1.510205 | -0.697880 |
| 32 | 1 | 0 | -5.639896 | -2.095019 | -1.274473 |
| 33 | 7 | 0 | -3.843857 | -0.314821 | 0.781967  |
| 34 | 1 | 0 | -3.550911 | 0.155318  | 1.631023  |
| 35 | 6 | 0 | -5.039427 | -0.971537 | 0.546749  |
| 36 | 1 | 0 | -5.841029 | -0.998261 | 1.267533  |
| 37 | 6 | 0 | -1.303760 | 1.739099  | -0.167684 |
| 38 | 5 | 0 | 0.020716  | -0.670835 | 0.602448  |

-----  
TS5/6

Standard orientation:

| Center<br>Number | Atomic<br>Number | Atomic<br>Type | Coordinates (Angstroms) |           |           |
|------------------|------------------|----------------|-------------------------|-----------|-----------|
|                  |                  |                | X                       | Y         | Z         |
| 1                | 5                | 0              | -1.446486               | 0.228854  | -0.509299 |
| 2                | 5                | 0              | -0.948899               | 0.935748  | 1.205044  |
| 3                | 5                | 0              | 1.496804                | 2.103394  | 0.183083  |
| 4                | 5                | 0              | 0.745320                | 0.881610  | 1.404557  |
| 5                | 5                | 0              | 1.442170                | 0.294091  | -0.136854 |
| 6                | 5                | 0              | 0.011830                | 2.445277  | -0.931339 |
| 7                | 5                | 0              | -0.052732               | 2.405806  | 0.961272  |
| 8                | 6                | 0              | 1.227838                | 1.500821  | -1.267532 |
| 9                | 1                | 0              | -0.006206               | -1.549498 | 0.940801  |
| 10               | 1                | 0              | -1.234341               | 0.037071  | -1.704236 |
| 11               | 1                | 0              | -1.750288               | 0.832849  | 2.096029  |
| 12               | 1                | 0              | 2.514033                | 2.652405  | 0.497853  |
| 13               | 1                | 0              | 1.298600                | 0.687545  | 2.445535  |
| 14               | 1                | 0              | -2.147736               | 2.509728  | -0.118812 |
| 15               | 1                | 0              | 0.598533                | 0.093525  | -1.040592 |
| 16               | 1                | 0              | -0.073768               | 3.503938  | -1.487617 |
| 17               | 1                | 0              | -0.277823               | 3.331171  | 1.678256  |
| 18               | 1                | 0              | 1.942082                | 1.630627  | -2.075246 |

|    |   |   |           |           |           |
|----|---|---|-----------|-----------|-----------|
| 19 | 6 | 0 | 2.764925  | -0.537368 | -0.108840 |
| 20 | 7 | 0 | 2.926155  | -1.743277 | 0.471738  |
| 21 | 1 | 0 | 2.142321  | -2.201435 | 0.924138  |
| 22 | 6 | 0 | 4.235846  | -2.181368 | 0.376286  |
| 23 | 1 | 0 | 4.566831  | -3.123830 | 0.781852  |
| 24 | 7 | 0 | 3.987575  | -0.223377 | -0.589246 |
| 25 | 1 | 0 | 4.171624  | 0.664924  | -1.037128 |
| 26 | 6 | 0 | 4.913471  | -1.213736 | -0.298262 |
| 27 | 1 | 0 | 5.948371  | -1.148354 | -0.593384 |
| 28 | 6 | 0 | -2.872770 | -0.426851 | -0.256451 |
| 29 | 7 | 0 | -3.577766 | -1.092663 | -1.203703 |
| 30 | 1 | 0 | -3.221935 | -1.182176 | -2.145437 |
| 31 | 6 | 0 | -4.779722 | -1.578725 | -0.712461 |
| 32 | 1 | 0 | -5.476741 | -2.135773 | -1.317782 |
| 33 | 7 | 0 | -3.664014 | -0.497937 | 0.840425  |
| 34 | 1 | 0 | -3.363762 | -0.087807 | 1.716896  |
| 35 | 6 | 0 | -4.833678 | -1.197216 | 0.590622  |
| 36 | 1 | 0 | -5.588332 | -1.357737 | 1.344068  |
| 37 | 6 | 0 | -1.269403 | 1.867882  | -0.141928 |
| 38 | 5 | 0 | -0.060840 | -0.426187 | 0.497875  |

6

Standard orientation:

| Center<br>Number | Atomic<br>Number | Atomic<br>Type | Coordinates (Angstroms) |           |           |
|------------------|------------------|----------------|-------------------------|-----------|-----------|
|                  |                  |                | X                       | Y         | Z         |
| 1                | 5                | 0              | -1.407077               | 0.187811  | -0.428118 |
| 2                | 5                | 0              | -0.944409               | 0.894263  | 1.197819  |
| 3                | 5                | 0              | 1.392968                | 2.060790  | 0.145307  |
| 4                | 5                | 0              | 0.781271                | 0.955162  | 1.399394  |
| 5                | 5                | 0              | 1.413162                | 0.282687  | -0.140439 |
| 6                | 5                | 0              | -0.007960               | 2.518005  | -0.857137 |
| 7                | 5                | 0              | -0.113025               | 2.429307  | 0.921852  |
| 8                | 6                | 0              | 1.111083                | 1.341148  | -1.401072 |
| 9                | 1                | 0              | 0.018747                | -1.508760 | 1.113258  |
| 10               | 1                | 0              | -1.088253               | -0.101230 | -1.570958 |
| 11               | 1                | 0              | -1.762891               | 0.807705  | 2.075738  |
| 12               | 1                | 0              | 2.399308                | 2.699355  | 0.183949  |
| 13               | 1                | 0              | 1.350451                | 0.856592  | 2.449165  |
| 14               | 1                | 0              | -2.212068               | 2.429958  | -0.146733 |
| 15               | 1                | 0              | 0.385182                | 0.791025  | -2.006774 |
| 16               | 1                | 0              | -0.078726               | 3.560150  | -1.437563 |
| 17               | 1                | 0              | -0.330765               | 3.374196  | 1.613430  |
| 18               | 1                | 0              | 1.921650                | 1.711798  | -2.034103 |
| 19               | 6                | 0              | 2.754156                | -0.489378 | -0.071742 |
| 20               | 7                | 0              | 3.154386                | -1.311706 | 0.930044  |
| 21               | 1                | 0              | 2.569172                | -1.459881 | 1.741804  |
| 22               | 6                | 0              | 4.390452                | -1.879193 | 0.666537  |
| 23               | 1                | 0              | 4.874816                | -2.560531 | 1.347499  |
| 24               | 7                | 0              | 3.766789                | -0.557145 | -0.974009 |
| 25               | 1                | 0              | 3.753500                | -0.028494 | -1.833981 |
| 26               | 6                | 0              | 4.783610                | -1.400800 | -0.541709 |

|    |   |   |           |           |           |
|----|---|---|-----------|-----------|-----------|
| 27 | 1 | 0 | 5.674699  | -1.582821 | -1.120554 |
| 28 | 6 | 0 | -2.839375 | -0.472075 | -0.226743 |
| 29 | 7 | 0 | -3.480605 | -1.213522 | -1.162592 |
| 30 | 1 | 0 | -3.068005 | -1.378743 | -2.070087 |
| 31 | 6 | 0 | -4.706065 | -1.676729 | -0.708546 |
| 32 | 1 | 0 | -5.360575 | -2.285986 | -1.310969 |
| 33 | 7 | 0 | -3.693618 | -0.471915 | 0.823162  |
| 34 | 1 | 0 | -3.442526 | -0.009530 | 1.689008  |
| 35 | 6 | 0 | -4.840563 | -1.202184 | 0.557546  |
| 36 | 1 | 0 | -5.636558 | -1.317998 | 1.275733  |
| 37 | 6 | 0 | -1.296170 | 1.842338  | -0.169720 |
| 38 | 5 | 0 | 0.017352  | -0.427135 | 0.581041  |

TS6/7

Standard orientation:

| Center<br>Number | Atomic<br>Number | Atomic<br>Type | Coordinates (Angstroms) |           |           |
|------------------|------------------|----------------|-------------------------|-----------|-----------|
|                  |                  |                | X                       | Y         | Z         |
| 1                | 5                | 0              | -1.449567               | 0.195736  | -0.461654 |
| 2                | 5                | 0              | -0.894932               | 0.854411  | 1.176454  |
| 3                | 5                | 0              | 1.640205                | 1.986995  | 0.095936  |
| 4                | 5                | 0              | 0.798806                | 0.941562  | 1.258766  |
| 5                | 5                | 0              | 1.336080                | 0.033764  | -0.526946 |
| 6                | 5                | 0              | -0.365950               | 2.579979  | -1.083895 |
| 7                | 5                | 0              | -0.076717               | 2.377311  | 0.964334  |
| 8                | 6                | 0              | 1.097284                | 2.200262  | -1.272501 |
| 9                | 1                | 0              | -0.005681               | -1.485814 | 1.086567  |
| 10               | 1                | 0              | -1.260382               | 0.059870  | -1.649587 |
| 11               | 1                | 0              | -1.656700               | 0.711664  | 2.094206  |
| 12               | 1                | 0              | 2.732858                | 2.329045  | 0.459359  |
| 13               | 1                | 0              | 1.442594                | 0.771039  | 2.261429  |
| 14               | 1                | 0              | -2.258565               | 2.460730  | 0.086374  |
| 15               | 1                | 0              | 1.192540                | -0.025606 | -1.735560 |
| 16               | 1                | 0              | -0.788815               | 3.553565  | -1.650657 |
| 17               | 1                | 0              | -0.143350               | 3.375071  | 1.607749  |
| 18               | 1                | 0              | 1.698842                | 2.498955  | -2.133486 |
| 19               | 6                | 0              | 2.742450                | -0.608940 | -0.210179 |
| 20               | 7                | 0              | 3.363398                | -0.791841 | 0.978506  |
| 21               | 1                | 0              | 2.954769                | -0.422170 | 1.830011  |
| 22               | 6                | 0              | 4.550802                | -1.485865 | 0.837244  |
| 23               | 1                | 0              | 5.188566                | -1.725006 | 1.673257  |
| 24               | 7                | 0              | 3.572017                | -1.200455 | -1.105213 |
| 25               | 1                | 0              | 3.351389                | -1.222593 | -2.090850 |
| 26               | 6                | 0              | 4.685983                | -1.750832 | -0.489713 |
| 27               | 1                | 0              | 5.460223                | -2.266637 | -1.034614 |
| 28               | 6                | 0              | -2.859268               | -0.481426 | -0.190909 |
| 29               | 7                | 0              | -3.566289               | -1.152633 | -1.133576 |
| 30               | 1                | 0              | -3.228622               | -1.221492 | -2.083661 |
| 31               | 6                | 0              | -4.729753               | -1.701916 | -0.618238 |
| 32               | 1                | 0              | -5.420374               | -2.275225 | -1.215648 |
| 33               | 7                | 0              | -3.616109               | -0.606601 | 0.925993  |
| 34               | 1                | 0              | -3.297926               | -0.226344 | 1.808890  |

|    |   |   |           |           |           |
|----|---|---|-----------|-----------|-----------|
| 35 | 6 | 0 | -4.761048 | -1.351766 | 0.694319  |
| 36 | 1 | 0 | -5.485779 | -1.560526 | 1.465093  |
| 37 | 6 | 0 | -1.332559 | 1.907788  | -0.060054 |
| 38 | 5 | 0 | -0.009936 | -0.456089 | 0.461271  |

7

Standard orientation:

| Center<br>Number | Atomic<br>Number | Atomic<br>Type | Coordinates (Angstroms) |           |           |
|------------------|------------------|----------------|-------------------------|-----------|-----------|
|                  |                  |                | X                       | Y         | Z         |
| 1                | 6                | 0              | 0.604045                | 3.017993  | -0.736870 |
| 2                | 5                | 0              | -0.891745               | 2.929796  | -0.870263 |
| 3                | 5                | 0              | -0.035938               | 2.493544  | 0.799829  |
| 4                | 5                | 0              | -1.469436               | 0.194487  | -0.499658 |
| 5                | 5                | 0              | 1.488970                | 0.163687  | -0.446721 |
| 6                | 5                | 0              | -0.840003               | 0.821190  | 1.059320  |
| 7                | 5                | 0              | 0.902724                | 0.919386  | 1.042309  |
| 8                | 1                | 0              | 0.996798                | 4.025644  | -0.892600 |
| 9                | 1                | 0              | -2.543729               | 2.150154  | 0.386284  |
| 10               | 1                | 0              | 2.696892                | 2.468160  | 0.204549  |
| 11               | 1                | 0              | -0.192914               | 3.209992  | 1.739688  |
| 12               | 1                | 0              | 1.312871                | 0.403667  | -1.608273 |
| 13               | 1                | 0              | -1.478636               | 0.610846  | 2.060319  |
| 14               | 1                | 0              | 1.542146                | 0.730449  | 2.045882  |
| 15               | 1                | 0              | 0.046094                | -1.511585 | 0.952520  |
| 16               | 6                | 0              | 2.830622                | -0.606537 | -0.219660 |
| 17               | 7                | 0              | 3.414686                | -0.963089 | 0.949693  |
| 18               | 1                | 0              | 3.000284                | -0.692843 | 1.833003  |
| 19               | 6                | 0              | 4.593211                | -1.663585 | 0.747187  |
| 20               | 1                | 0              | 5.201274                | -2.027844 | 1.559689  |
| 21               | 7                | 0              | 3.670634                | -1.102326 | -1.164186 |
| 22               | 1                | 0              | 3.493814                | -0.976454 | -2.150183 |
| 23               | 6                | 0              | 4.757297                | -1.755303 | -0.597701 |
| 24               | 1                | 0              | 5.533699                | -2.215480 | -1.187494 |
| 25               | 6                | 0              | -2.798473               | -0.615995 | -0.230128 |
| 26               | 7                | 0              | -3.480888               | -0.827553 | 0.919348  |
| 27               | 1                | 0              | -3.140695               | -0.454736 | 1.797999  |
| 28               | 6                | 0              | -4.593270               | -1.628907 | 0.718245  |
| 29               | 1                | 0              | -5.260640               | -1.909631 | 1.517257  |
| 30               | 7                | 0              | -3.508542               | -1.298265 | -1.160017 |
| 31               | 1                | 0              | -3.230535               | -1.310079 | -2.131330 |
| 32               | 6                | 0              | -4.611762               | -1.931251 | -0.606163 |
| 33               | 1                | 0              | -5.297440               | -2.525388 | -1.188557 |
| 34               | 5                | 0              | 0.068326                | -0.470199 | 0.351632  |
| 35               | 6                | 0              | -1.574624               | 1.831331  | 0.000323  |
| 36               | 5                | 0              | 1.609084                | 2.051109  | -0.090907 |
| 37               | 1                | 0              | -1.559100               | 3.847018  | -1.267863 |
| 38               | 1                | 0              | -1.193603               | 0.115262  | -1.663864 |

TS7/8

Standard orientation:

| Center<br>Number | Atomic<br>Number | Atomic<br>Type | Coordinates (Angstroms) |           |           |
|------------------|------------------|----------------|-------------------------|-----------|-----------|
|                  |                  |                | X                       | Y         | Z         |
| 1                | 6                | 0              | 0.629510                | 3.204759  | -0.801409 |
| 2                | 5                | 0              | -0.923434               | 3.072157  | -0.463306 |
| 3                | 5                | 0              | 0.487020                | 2.949785  | 0.804693  |
| 4                | 5                | 0              | -1.507184               | 0.341427  | -0.924271 |
| 5                | 5                | 0              | 1.313562                | 0.234956  | -0.432161 |
| 6                | 5                | 0              | -0.745346               | 1.577049  | 1.037879  |
| 7                | 5                | 0              | 0.971808                | 1.277149  | 0.972842  |
| 8                | 1                | 0              | 0.922992                | 4.192247  | -1.159094 |
| 9                | 1                | 0              | -2.768359               | 1.972506  | -0.073888 |
| 10               | 1                | 0              | 2.864416                | 2.381477  | -0.540744 |
| 11               | 1                | 0              | 0.615976                | 3.763338  | 1.669240  |
| 12               | 1                | 0              | 1.243666                | 0.533783  | -1.592549 |
| 13               | 1                | 0              | -1.412684               | 1.612323  | 2.039457  |
| 14               | 1                | 0              | 1.561501                | 1.029365  | 1.994679  |
| 15               | 1                | 0              | -0.281145               | -0.972827 | 1.239863  |
| 16               | 6                | 0              | 2.531925                | -0.716455 | -0.174040 |
| 17               | 7                | 0              | 2.972054                | -1.204611 | 1.009872  |
| 18               | 1                | 0              | 2.537275                | -0.918227 | 1.878283  |
| 19               | 6                | 0              | 4.056789                | -2.048689 | 0.848484  |
| 20               | 1                | 0              | 4.549341                | -2.530496 | 1.677886  |
| 21               | 7                | 0              | 3.363214                | -1.278512 | -1.086620 |
| 22               | 1                | 0              | 3.284295                | -1.076362 | -2.073222 |
| 23               | 6                | 0              | 4.307325                | -2.098727 | -0.486714 |
| 24               | 1                | 0              | 5.057758                | -2.632704 | -1.047257 |
| 25               | 6                | 0              | -2.604918               | -0.680178 | -0.416780 |
| 26               | 7                | 0              | -3.258165               | -0.662726 | 0.767839  |
| 27               | 1                | 0              | -3.014429               | 0.012388  | 1.485100  |
| 28               | 6                | 0              | -4.147144               | -1.716837 | 0.877280  |
| 29               | 1                | 0              | -4.754526               | -1.878131 | 1.753507  |
| 30               | 7                | 0              | -3.104438               | -1.764673 | -1.053860 |
| 31               | 1                | 0              | -2.802930               | -2.022144 | -1.983105 |
| 32               | 6                | 0              | -4.056226               | -2.418211 | -0.284354 |
| 33               | 1                | 0              | -4.573716               | -3.301972 | -0.621354 |
| 34               | 5                | 0              | -0.079909               | -0.013239 | 0.541014  |
| 35               | 6                | 0              | -1.763717               | 1.795589  | -0.482549 |
| 36               | 5                | 0              | 1.685630                | 2.198050  | -0.421244 |
| 37               | 1                | 0              | -1.523650               | 4.080650  | -0.181778 |
| 38               | 1                | 0              | -1.046427               | 0.014265  | -1.982394 |

8

Standard orientation:

| Center<br>Number | Atomic<br>Number | Atomic<br>Type | Coordinates (Angstroms) |          |           |
|------------------|------------------|----------------|-------------------------|----------|-----------|
|                  |                  |                | X                       | Y        | Z         |
| 1                | 6                | 0              | 1.404318                | 2.904380 | -1.191852 |
| 2                | 5                | 0              | 0.362810                | 3.299392 | -0.087798 |
| 3                | 5                | 0              | 2.106194                | 2.830895 | 0.325478  |
| 4                | 5                | 0              | -0.934370               | 0.948106 | -0.521505 |
| 5                | 5                | 0              | 1.025765                | 0.011104 | -0.519499 |

|    |   |   |           |           |           |
|----|---|---|-----------|-----------|-----------|
| 6  | 5 | 0 | 0.851244  | 2.293080  | 1.379813  |
| 7  | 5 | 0 | 1.944209  | 1.061322  | 0.633885  |
| 8  | 1 | 0 | 1.712940  | 3.668558  | -1.904794 |
| 9  | 1 | 0 | -1.424994 | 2.394966  | 1.219714  |
| 10 | 1 | 0 | 3.183108  | 1.309171  | -1.671263 |
| 11 | 1 | 0 | 3.021649  | 3.462497  | 0.763211  |
| 12 | 1 | 0 | 0.973991  | 0.103010  | -1.711918 |
| 13 | 1 | 0 | 0.788974  | 2.554806  | 2.542832  |
| 14 | 1 | 0 | 2.736650  | 0.469566  | 1.313867  |
| 15 | 1 | 0 | -0.190740 | -0.029275 | 1.761173  |
| 16 | 6 | 0 | 1.446497  | -1.478107 | -0.206238 |
| 17 | 7 | 0 | 1.638003  | -2.093610 | 0.983661  |
| 18 | 1 | 0 | 1.566900  | -1.573930 | 1.849515  |
| 19 | 6 | 0 | 2.050965  | -3.404603 | 0.824668  |
| 20 | 1 | 0 | 2.266036  | -4.053177 | 1.658914  |
| 21 | 7 | 0 | 1.729033  | -2.439389 | -1.119111 |
| 22 | 1 | 0 | 1.694394  | -2.251127 | -2.111517 |
| 23 | 6 | 0 | 2.110055  | -3.627942 | -0.515212 |
| 24 | 1 | 0 | 2.384638  | -4.506751 | -1.076209 |
| 25 | 6 | 0 | -2.239114 | 0.101163  | -0.233442 |
| 26 | 7 | 0 | -2.740670 | -0.386492 | 0.925607  |
| 27 | 1 | 0 | -2.224823 | -0.292878 | 1.792215  |
| 28 | 6 | 0 | -3.953622 | -1.026163 | 0.732097  |
| 29 | 1 | 0 | -4.508903 | -1.479341 | 1.537798  |
| 30 | 7 | 0 | -3.163824 | -0.245937 | -1.160578 |
| 31 | 1 | 0 | -3.062610 | 0.024054  | -2.129653 |
| 32 | 6 | 0 | -4.226135 | -0.934798 | -0.596869 |
| 33 | 1 | 0 | -5.064909 | -1.289644 | -1.174019 |
| 34 | 5 | 0 | 0.201439  | 0.726970  | 0.900411  |
| 35 | 6 | 0 | -0.616496 | 2.116784  | 0.544971  |
| 36 | 5 | 0 | 2.233079  | 1.650134  | -1.028388 |
| 37 | 1 | 0 | -0.015233 | 4.428514  | 0.061626  |
| 38 | 1 | 0 | -0.885524 | 1.209691  | -1.689266 |

-----  
TS8/m-2

Standard orientation:

| Center<br>Number | Atomic<br>Number | Atomic<br>Type | Coordinates (Angstroms) |           |           |
|------------------|------------------|----------------|-------------------------|-----------|-----------|
|                  |                  |                | X                       | Y         | Z         |
| 1                | 6                | 0              | -0.031821               | 2.308113  | 1.517644  |
| 2                | 5                | 0              | 0.989832                | 2.323826  | 0.362283  |
| 3                | 5                | 0              | -0.705535               | 2.979140  | 0.164579  |
| 4                | 5                | 0              | 1.637749                | -0.016632 | 0.321746  |
| 5                | 5                | 0              | -1.500347               | 0.028996  | 0.333583  |
| 6                | 5                | 0              | -0.020225               | 2.019376  | -1.171277 |
| 7                | 5                | 0              | -1.601179               | 1.615575  | -0.475932 |
| 8                | 1                | 0              | 0.178784                | 2.918493  | 2.395369  |
| 9                | 1                | 0              | 1.788180                | 0.988737  | -1.586834 |
| 10               | 1                | 0              | -2.384502               | 1.977189  | 2.001161  |
| 11               | 1                | 0              | -0.985281               | 4.116810  | -0.070614 |
| 12               | 1                | 0              | -0.965334               | -0.405409 | 1.315874  |
| 13               | 1                | 0              | 0.193249                | 2.517989  | -2.234532 |

|    |   |   |           |           |           |
|----|---|---|-----------|-----------|-----------|
| 14 | 1 | 0 | -2.606577 | 1.798413  | -1.113816 |
| 15 | 1 | 0 | -0.599698 | -0.288706 | -2.117109 |
| 16 | 6 | 0 | -2.837909 | -0.742046 | 0.103534  |
| 17 | 7 | 0 | -3.790392 | -0.569560 | -0.848899 |
| 18 | 1 | 0 | -3.723760 | 0.199249  | -1.503686 |
| 19 | 6 | 0 | -4.818117 | -1.491485 | -0.730210 |
| 20 | 1 | 0 | -5.665847 | -1.507043 | -1.396491 |
| 21 | 7 | 0 | -3.298631 | -1.801920 | 0.822817  |
| 22 | 1 | 0 | -2.793394 | -2.154571 | 1.621946  |
| 23 | 6 | 0 | -4.507799 | -2.277338 | 0.332464  |
| 24 | 1 | 0 | -5.029877 | -3.111131 | 0.773861  |
| 25 | 6 | 0 | 3.073447  | -0.637838 | 0.087956  |
| 26 | 7 | 0 | 3.920121  | -0.518470 | -0.961422 |
| 27 | 1 | 0 | 3.682143  | 0.022382  | -1.783164 |
| 28 | 6 | 0 | 5.104760  | -1.192431 | -0.740613 |
| 29 | 1 | 0 | 5.906522  | -1.214067 | -1.461417 |
| 30 | 7 | 0 | 3.751806  | -1.406668 | 0.972111  |
| 31 | 1 | 0 | 3.358720  | -1.654169 | 1.871016  |
| 32 | 6 | 0 | 4.999124  | -1.758615 | 0.494164  |
| 33 | 1 | 0 | 5.691476  | -2.365649 | 1.055184  |
| 34 | 5 | 0 | -0.504036 | 0.285744  | -1.067884 |
| 35 | 6 | 0 | 1.106371  | 0.892720  | -0.735032 |
| 36 | 5 | 0 | -1.457331 | 1.766486  | 1.270342  |
| 37 | 1 | 0 | 1.987759  | 2.985194  | 0.319918  |
| 38 | 1 | 0 | 1.164145  | -0.366425 | 1.354444  |

-----  
TSm-2/9

Standard orientation:

| Center<br>Number | Atomic<br>Number | Atomic<br>Type | Coordinates (Angstroms) |           |           |
|------------------|------------------|----------------|-------------------------|-----------|-----------|
|                  |                  |                | X                       | Y         | Z         |
| 1                | 6                | 0              | -0.798602               | -0.450140 | 1.145088  |
| 2                | 5                | 0              | -1.566445               | -0.618751 | -0.169319 |
| 3                | 5                | 0              | -0.551173               | 1.332783  | 1.033576  |
| 4                | 5                | 0              | 0.672431                | -0.093426 | 1.353162  |
| 5                | 5                | 0              | 1.191053                | 1.351006  | -1.258311 |
| 6                | 1                | 0              | -1.369489               | -0.612670 | 2.069365  |
| 7                | 1                | 0              | -2.503119               | 1.884629  | -0.744523 |
| 8                | 1                | 0              | -1.163735               | -1.190577 | -1.142270 |
| 9                | 1                | 0              | -1.012106               | 1.904404  | 1.982397  |
| 10               | 1                | 0              | 1.152527                | -0.190285 | 2.451613  |
| 11               | 1                | 0              | -0.520557               | 1.904873  | -2.663972 |
| 12               | 1                | 0              | -0.022055               | 3.547124  | -0.111149 |
| 13               | 1                | 0              | 1.097710                | -1.008481 | -0.850173 |
| 14               | 1                | 0              | 2.133337                | 1.921454  | 1.108979  |
| 15               | 1                | 0              | 2.067377                | 1.823553  | -1.931029 |
| 16               | 6                | 0              | -3.139794               | -0.666664 | -0.052755 |
| 17               | 7                | 0              | -4.016787               | -1.243239 | -0.906090 |
| 18               | 7                | 0              | -3.920963               | -0.133507 | 0.914170  |
| 19               | 1                | 0              | -3.710106               | -1.718024 | -1.743923 |
| 20               | 1                | 0              | -3.525844               | 0.426879  | 1.659399  |
| 21               | 6                | 0              | -5.263576               | -0.355329 | 0.666781  |



|    |   |   |           |           |           |
|----|---|---|-----------|-----------|-----------|
| 22 | 6 | 0 | -5.327237 | -1.066733 | -0.490918 |
| 23 | 1 | 0 | -6.043529 | 0.003917  | 1.318871  |
| 24 | 1 | 0 | -6.171131 | -1.452995 | -1.039516 |
| 25 | 5 | 0 | -1.389122 | 1.458831  | -0.632580 |
| 26 | 5 | 0 | 1.647339  | -0.145436 | -0.229046 |
| 27 | 5 | 0 | 1.235777  | 1.372692  | 0.520025  |
| 28 | 6 | 0 | -0.293115 | 1.474148  | -1.686468 |
| 29 | 5 | 0 | 0.032087  | 2.364026  | -0.263010 |
| 30 | 6 | 0 | 3.176737  | -0.455668 | -0.092251 |
| 31 | 7 | 0 | 3.828803  | -1.550000 | -0.561616 |
| 32 | 1 | 0 | 3.344353  | -2.278449 | -1.065848 |
| 33 | 6 | 0 | 5.181562  | -1.515300 | -0.256032 |
| 34 | 1 | 0 | 5.865953  | -2.296385 | -0.545810 |
| 35 | 7 | 0 | 4.150809  | 0.265915  | 0.510851  |
| 36 | 1 | 0 | 3.929586  | 1.149309  | 0.955252  |
| 37 | 6 | 0 | 5.383598  | -0.358613 | 0.427884  |
| 38 | 1 | 0 | 6.280626  | 0.064710  | 0.850679  |

9

Standard orientation:

| Center<br>Number | Atomic<br>Number | Atomic<br>Type | Coordinates (Angstroms) |           |           |
|------------------|------------------|----------------|-------------------------|-----------|-----------|
|                  |                  |                | X                       | Y         | Z         |
| 1                | 6                | 0              | -0.758251               | -1.014730 | 0.763431  |
| 2                | 5                | 0              | -1.618634               | -0.353177 | -0.367084 |
| 3                | 5                | 0              | -0.879307               | 0.710431  | 0.949756  |
| 4                | 5                | 0              | 0.731400                | -0.892554 | 0.914355  |
| 5                | 5                | 0              | 1.339028                | 1.775361  | -0.641822 |
| 6                | 1                | 0              | -1.299113               | -1.564028 | 1.539230  |
| 7                | 1                | 0              | -2.396210               | 2.077487  | -0.810430 |
| 8                | 1                | 0              | -1.275825               | -0.519256 | -1.507951 |
| 9                | 1                | 0              | -1.583316               | 0.935621  | 1.903278  |
| 10               | 1                | 0              | 1.300579                | -1.449171 | 1.817853  |
| 11               | 1                | 0              | -0.134364               | 3.078667  | -1.783219 |
| 12               | 1                | 0              | -0.167231               | 3.170037  | 1.190192  |
| 13               | 1                | 0              | 1.228928                | -0.489364 | -1.386213 |
| 14               | 1                | 0              | 1.732851                | 1.099395  | 1.887854  |
| 15               | 1                | 0              | 2.306141                | 2.467064  | -0.815315 |
| 16               | 6                | 0              | -3.183024               | -0.506810 | -0.186350 |
| 17               | 7                | 0              | -4.081543               | -0.880074 | -1.123318 |
| 18               | 7                | 0              | -3.927528               | -0.289658 | 0.919057  |
| 19               | 1                | 0              | -3.804229               | -1.097035 | -2.070467 |
| 20               | 1                | 0              | -3.505274               | 0.074028  | 1.765486  |
| 21               | 6                | 0              | -5.274966               | -0.510065 | 0.681078  |
| 22               | 6                | 0              | -5.375134               | -0.888888 | -0.619703 |
| 23               | 1                | 0              | -6.029192               | -0.380412 | 1.440524  |
| 24               | 1                | 0              | -6.231433               | -1.158514 | -1.216535 |
| 25               | 5                | 0              | -1.320213               | 1.571102  | -0.637457 |
| 26               | 5                | 0              | 1.682277                | -0.066202 | -0.358862 |
| 27               | 5                | 0              | 1.067312                | 0.981514  | 0.891836  |
| 28               | 6                | 0              | -0.051434               | 2.153261  | -1.211011 |
| 29               | 5                | 0              | -0.022299               | 2.217800  | 0.484550  |

|    |   |   |          |           |           |
|----|---|---|----------|-----------|-----------|
| 30 | 6 | 0 | 3.206877 | -0.382228 | -0.204244 |
| 31 | 7 | 0 | 3.989433 | -1.103698 | -1.045043 |
| 32 | 1 | 0 | 3.622494 | -1.514057 | -1.891431 |
| 33 | 6 | 0 | 5.297533 | -1.188248 | -0.586813 |
| 34 | 1 | 0 | 6.069240 | -1.718722 | -1.120963 |
| 35 | 7 | 0 | 4.051656 | -0.010891 | 0.786517  |
| 36 | 1 | 0 | 3.724341 | 0.552966  | 1.560869  |
| 37 | 6 | 0 | 5.334050 | -0.494594 | 0.579867  |
| 38 | 1 | 0 | 6.145763 | -0.302020 | 1.262848  |

TS9/p-2

Standard orientation:

| Center<br>Number | Atomic<br>Number | Atomic<br>Type | Coordinates (Angstroms) |           |           |
|------------------|------------------|----------------|-------------------------|-----------|-----------|
|                  |                  |                | X                       | Y         | Z         |
| 1                | 6                | 0              | 0.234267                | 1.991443  | 1.335153  |
| 2                | 5                | 0              | 1.624990                | -0.507210 | 0.416262  |
| 3                | 5                | 0              | 0.501885                | 1.094911  | -1.196797 |
| 4                | 5                | 0              | 1.339435                | 1.564934  | 0.354687  |
| 5                | 5                | 0              | -0.051665               | 2.460163  | -0.265050 |
| 6                | 5                | 0              | 0.730416                | -0.850567 | -0.916108 |
| 7                | 5                | 0              | -1.608121               | -0.074272 | 0.282119  |
| 8                | 5                | 0              | -1.270050               | 1.319030  | -0.762148 |
| 9                | 5                | 0              | -1.224993               | 1.748809  | 0.948499  |
| 10               | 6                | 0              | -0.692600               | -0.227101 | -1.107061 |
| 11               | 1                | 0              | 0.460421                | 2.716728  | 2.118683  |
| 12               | 1                | 0              | 1.305815                | -0.644877 | 1.564689  |
| 13               | 1                | 0              | 0.971863                | 1.253181  | -2.284067 |
| 14               | 1                | 0              | 2.439397                | 2.047559  | 0.345439  |
| 15               | 1                | 0              | 0.008068                | 3.560398  | -0.724387 |
| 16               | 1                | 0              | 1.184044                | -1.371852 | -1.918086 |
| 17               | 1                | 0              | -1.140373               | -0.614663 | 1.241472  |
| 18               | 1                | 0              | -2.166309               | 1.645553  | -1.496728 |
| 19               | 1                | 0              | -2.157440               | 2.310349  | 1.454424  |
| 20               | 1                | 0              | -1.168879               | -0.504613 | -2.047880 |
| 21               | 6                | 0              | -3.135162               | -0.461428 | 0.158641  |
| 22               | 7                | 0              | -4.087646               | -0.033876 | -0.700883 |
| 23               | 1                | 0              | -3.879532               | 0.686502  | -1.382695 |
| 24               | 6                | 0              | -5.311738               | -0.630885 | -0.451257 |
| 25               | 1                | 0              | -6.195067               | -0.412251 | -1.029672 |
| 26               | 7                | 0              | -3.785077               | -1.344490 | 0.952946  |
| 27               | 1                | 0              | -3.309232               | -1.829404 | 1.701195  |
| 28               | 6                | 0              | -5.120903               | -1.466842 | 0.603523  |
| 29               | 1                | 0              | -5.803095               | -2.120522 | 1.122840  |
| 30               | 6                | 0              | 3.178521                | -0.627998 | 0.225027  |
| 31               | 7                | 0              | 4.150323                | -0.705117 | 1.168389  |
| 32               | 1                | 0              | 3.936160                | -0.654678 | 2.154203  |
| 33               | 6                | 0              | 5.412362                | -0.802481 | 0.602766  |
| 34               | 1                | 0              | 6.313644                | -0.868634 | 1.190860  |
| 35               | 7                | 0              | 3.859551                | -0.684447 | -0.944619 |
| 36               | 1                | 0              | 3.366823                | -0.667837 | -1.829089 |
| 37               | 6                | 0              | 5.224022                | -0.789921 | -0.744014 |

38      1      0      5.931524 -0.843137 -1.556010

m

Standard orientation:

| Center<br>Number | Atomic<br>Number | Atomic<br>Type | Coordinates (Angstroms) |           |           |
|------------------|------------------|----------------|-------------------------|-----------|-----------|
|                  |                  |                | X                       | Y         | Z         |
| 1                | 6                | 0              | -0.874604               | -1.421907 | -0.000000 |
| 2                | 5                | 0              | 0.371909                | -1.098558 | 0.937529  |
| 3                | 5                | 0              | -1.191715               | -0.141188 | 0.921205  |
| 4                | 5                | 0              | 0.371909                | 0.648610  | -1.304886 |
| 5                | 5                | 0              | 0.371909                | 0.648610  | 1.304886  |
| 6                | 5                | 0              | -0.711596               | 1.357949  | -0.000000 |
| 7                | 1                | 0              | -1.423675               | -2.352577 | -0.000000 |
| 8                | 1                | 0              | 0.863829                | -1.890077 | -1.666728 |
| 9                | 1                | 0              | -2.095431               | -0.161785 | -1.687437 |
| 10               | 1                | 0              | -2.095431               | -0.161785 | 1.687437  |
| 11               | 1                | 0              | 0.753318                | 0.945673  | -2.388306 |
| 12               | 1                | 0              | 0.753318                | 0.945673  | 2.388306  |
| 13               | 1                | 0              | -1.431825               | 2.302250  | -0.000000 |
| 14               | 1                | 0              | 1.733976                | 2.464607  | 0.000000  |
| 15               | 5                | 0              | 0.969350                | 1.562569  | 0.000000  |
| 16               | 5                | 0              | -1.191715               | -0.141188 | -0.921205 |
| 17               | 1                | 0              | 0.863829                | -1.890077 | 1.666728  |
| 18               | 1                | 0              | 2.412133                | -0.245375 | 0.000000  |
| 19               | 6                | 0              | 1.350629                | -0.019386 | 0.000000  |
| 20               | 5                | 0              | 0.371909                | -1.098558 | -0.937529 |

TSm/10

Standard orientation:

| Center<br>Number | Atomic<br>Number | Atomic<br>Type | Coordinates (Angstroms) |           |           |
|------------------|------------------|----------------|-------------------------|-----------|-----------|
|                  |                  |                | X                       | Y         | Z         |
| 1                | 6                | 0              | 0.982393                | 0.024771  | -1.443713 |
| 2                | 5                | 0              | 0.377609                | -0.748316 | -0.202320 |
| 3                | 5                | 0              | 2.321015                | 0.909137  | -1.119602 |
| 4                | 5                | 0              | 0.768852                | 1.037216  | -0.194810 |
| 5                | 5                | 0              | 2.820711                | -0.090230 | 1.540395  |
| 6                | 1                | 0              | 0.505542                | 0.089367  | -2.412303 |
| 7                | 1                | 0              | 2.635301                | -1.723233 | -1.875431 |
| 8                | 1                | 0              | -0.125274               | -1.822073 | -0.173247 |
| 9                | 1                | 0              | 2.717648                | 1.656220  | -1.952211 |
| 10               | 1                | 0              | -0.033470               | 1.911743  | -0.216837 |
| 11               | 1                | 0              | 2.379651                | -2.224338 | 0.820084  |
| 12               | 1                | 0              | 4.570798                | -0.180180 | -0.239437 |
| 13               | 1                | 0              | 0.495188                | -0.142836 | 2.237748  |
| 14               | 1                | 0              | 2.565214                | 2.374304  | 1.069090  |
| 15               | 1                | 0              | 3.360701                | -0.264010 | 2.579973  |
| 16               | 6                | 0              | -1.960118               | -0.100217 | -0.116966 |
| 17               | 7                | 0              | -2.898368               | -1.081362 | -0.040642 |
| 18               | 7                | 0              | -2.719816               | 1.017334  | 0.031721  |

|    |   |   |           |           |           |
|----|---|---|-----------|-----------|-----------|
| 19 | 1 | 0 | -2.651528 | -2.058770 | -0.106631 |
| 20 | 1 | 0 | -2.306758 | 1.939319  | 0.033767  |
| 21 | 6 | 0 | -4.074297 | 0.750171  | 0.196692  |
| 22 | 6 | 0 | -4.189806 | -0.601796 | 0.149752  |
| 23 | 1 | 0 | -4.818563 | 1.520139  | 0.329679  |
| 24 | 1 | 0 | -5.054272 | -1.242209 | 0.232911  |
| 25 | 5 | 0 | 2.248046  | -0.906091 | -1.105884 |
| 26 | 5 | 0 | 1.124153  | -0.013797 | 1.235702  |
| 27 | 5 | 0 | 2.326137  | 1.280562  | 0.666394  |
| 28 | 6 | 0 | 2.261809  | -1.181555 | 0.540295  |
| 29 | 5 | 0 | 3.406922  | -0.015179 | -0.064087 |

10

Standard orientation:

| Center<br>Number | Atomic<br>Number | Atomic<br>Type | Coordinates (Angstroms) |           |           |
|------------------|------------------|----------------|-------------------------|-----------|-----------|
|                  |                  |                | X                       | Y         | Z         |
| 1                | 6                | 0              | -0.713011               | 0.556780  | 1.233918  |
| 2                | 5                | 0              | 0.197183                | -0.464216 | 0.327774  |
| 3                | 5                | 0              | -2.092865               | 1.310552  | 0.630356  |
| 4                | 5                | 0              | -0.669043               | 0.966397  | -0.364995 |
| 5                | 5                | 0              | -2.857797               | -0.730769 | -1.238623 |
| 6                | 1                | 0              | -0.264589               | 1.151976  | 2.024731  |
| 7                | 1                | 0              | -2.425400               | -0.653721 | 2.500020  |
| 8                | 1                | 0              | 0.163750                | -1.627487 | 0.633383  |
| 9                | 1                | 0              | -2.347960               | 2.385068  | 1.071498  |
| 10               | 1                | 0              | 0.077978                | 1.788653  | -0.806649 |
| 11               | 1                | 0              | -2.539541               | -2.319357 | 0.337141  |
| 12               | 1                | 0              | -4.472268               | 0.193425  | 0.446128  |
| 13               | 1                | 0              | -0.631559               | -1.211265 | -1.998725 |
| 14               | 1                | 0              | -2.496123               | 1.671549  | -1.966715 |
| 15               | 1                | 0              | -3.465085               | -1.310188 | -2.077057 |
| 16               | 6                | 0              | 1.761270                | -0.163083 | 0.083412  |
| 17               | 7                | 0              | 2.718671                | -1.104942 | 0.232260  |
| 18               | 7                | 0              | 2.448324                | 0.950476  | -0.248360 |
| 19               | 1                | 0              | 2.485937                | -2.054752 | 0.491950  |
| 20               | 1                | 0              | 1.968623                | 1.816932  | -0.461053 |
| 21               | 6                | 0              | 3.809929                | 0.714977  | -0.313926 |
| 22               | 6                | 0              | 3.983781                | -0.599199 | -0.007462 |
| 23               | 1                | 0              | 4.522433                | 1.483273  | -0.568640 |
| 24               | 1                | 0              | 4.876392                | -1.200342 | 0.058692  |
| 25               | 5                | 0              | -2.051316               | -0.333454 | 1.413226  |
| 26               | 5                | 0              | -1.110238               | -0.620344 | -1.077302 |
| 27               | 5                | 0              | -2.262037               | 0.855097  | -1.130886 |
| 28               | 6                | 0              | -2.315016               | -1.278239 | 0.112253  |
| 29               | 5                | 0              | -3.310540               | 0.132754  | 0.196216  |

TS10/11

Standard orientation:

| Center<br>Number | Atomic<br>Number | Atomic<br>Type | Coordinates (Angstroms) |   |   |
|------------------|------------------|----------------|-------------------------|---|---|
|                  |                  |                | X                       | Y | Z |

|    |   |   |           |           |           |
|----|---|---|-----------|-----------|-----------|
| 1  | 6 | 0 | -2.107161 | 0.950345  | -0.944610 |
| 2  | 5 | 0 | 0.462405  | 0.440131  | 0.255935  |
| 3  | 5 | 0 | -2.926187 | -0.529395 | -1.057773 |
| 4  | 5 | 0 | -1.115014 | -0.305905 | -1.110606 |
| 5  | 5 | 0 | -2.367601 | 1.139698  | 0.811905  |
| 6  | 5 | 0 | -3.275357 | -0.432393 | 0.732949  |
| 7  | 5 | 0 | -1.910908 | -1.437703 | 0.128104  |
| 8  | 5 | 0 | -1.597879 | -0.247478 | 1.469418  |
| 9  | 1 | 0 | -2.017349 | 1.719801  | -1.709471 |
| 10 | 1 | 0 | -4.536933 | 1.494591  | -0.650164 |
| 11 | 1 | 0 | 0.217575  | 1.599638  | 0.318081  |
| 12 | 1 | 0 | -3.401089 | -1.069354 | -2.006531 |
| 13 | 1 | 0 | -0.564924 | -0.615832 | -2.126109 |
| 14 | 1 | 0 | -2.454086 | 2.181663  | 1.393427  |
| 15 | 1 | 0 | -4.114181 | -0.959039 | 1.399111  |
| 16 | 1 | 0 | 0.160717  | -1.700975 | 0.445781  |
| 17 | 1 | 0 | -1.893907 | -2.628018 | 0.149435  |
| 18 | 1 | 0 | -1.400123 | -0.536144 | 2.610915  |
| 19 | 6 | 0 | 2.025730  | 0.186124  | 0.114017  |
| 20 | 7 | 0 | 2.970483  | 1.152209  | 0.133581  |
| 21 | 7 | 0 | 2.721197  | -0.954573 | -0.093102 |
| 22 | 1 | 0 | 2.734246  | 2.127189  | 0.271330  |
| 23 | 1 | 0 | 2.271548  | -1.857868 | -0.174270 |
| 24 | 6 | 0 | 4.075987  | -0.711407 | -0.202537 |
| 25 | 6 | 0 | 4.235788  | 0.634172  | -0.054903 |
| 26 | 1 | 0 | 4.797165  | -1.494723 | -0.373458 |
| 27 | 1 | 0 | 5.122947  | 1.246878  | -0.068867 |
| 28 | 5 | 0 | -3.592425 | 0.858892  | -0.311769 |
| 29 | 6 | 0 | -0.421765 | -0.779317 | 0.362470  |

11

Standard orientation:

| Center<br>Number | Atomic<br>Number | Atomic<br>Type | Coordinates (Angstroms) |           |           |
|------------------|------------------|----------------|-------------------------|-----------|-----------|
|                  |                  |                | X                       | Y         | Z         |
| 1                | 6                | 0              | 1.729392                | -0.451912 | -1.254851 |
| 2                | 5                | 0              | -0.370389               | -0.654577 | 0.268142  |
| 3                | 5                | 0              | 2.518074                | 0.984911  | -0.923039 |
| 4                | 5                | 0              | 0.775924                | 0.686004  | -0.582557 |
| 5                | 5                | 0              | 2.462771                | -1.351108 | 0.172595  |
| 6                | 5                | 0              | 3.332297                | 0.211328  | 0.534140  |
| 7                | 5                | 0              | 1.897444                | 1.227790  | 0.776336  |
| 8                | 5                | 0              | 1.910971                | -0.431444 | 1.499187  |
| 9                | 1                | 0              | 1.406577                | -0.835260 | -2.219886 |
| 10               | 1                | 0              | 4.131804                | -0.877332 | -1.810570 |
| 11               | 1                | 0              | -0.190174               | -1.819125 | 0.100191  |
| 12               | 1                | 0              | 2.728863                | 1.906747  | -1.644955 |
| 13               | 1                | 0              | 0.045947                | 1.409258  | -1.204072 |
| 14               | 1                | 0              | 2.682976                | -2.525823 | 0.199804  |
| 15               | 1                | 0              | 4.363032                | 0.484441  | 1.069933  |
| 16               | 1                | 0              | -0.072749               | 1.046227  | 1.650819  |

|    |   |   |           |           |           |
|----|---|---|-----------|-----------|-----------|
| 17 | 1 | 0 | 1.892303  | 2.300343  | 1.292465  |
| 18 | 1 | 0 | 2.045190  | -0.659028 | 2.664776  |
| 19 | 6 | 0 | -1.907303 | -0.267229 | 0.066060  |
| 20 | 7 | 0 | -2.941334 | -1.135261 | 0.051862  |
| 21 | 7 | 0 | -2.482118 | 0.942044  | -0.102104 |
| 22 | 1 | 0 | -2.806533 | -2.132485 | 0.162133  |
| 23 | 1 | 0 | -1.925582 | 1.783707  | -0.198908 |
| 24 | 6 | 0 | -3.854526 | 0.840413  | -0.221821 |
| 25 | 6 | 0 | -4.149885 | -0.485586 | -0.117479 |
| 26 | 1 | 0 | -4.491775 | 1.696931  | -0.373840 |
| 27 | 1 | 0 | -5.093523 | -1.006062 | -0.151817 |
| 28 | 5 | 0 | 3.330224  | -0.534630 | -1.003650 |
| 29 | 6 | 0 | 0.509191  | 0.345749  | 1.046399  |

TS11/12

Standard orientation:

| Center<br>Number | Atomic<br>Number | Atomic<br>Type | Coordinates (Angstroms) |           |           |
|------------------|------------------|----------------|-------------------------|-----------|-----------|
|                  |                  |                | X                       | Y         | Z         |
| 1                | 6                | 0              | -1.575308               | 0.415146  | -1.258376 |
| 2                | 5                | 0              | 0.319544                | 0.620788  | 0.307007  |
| 3                | 5                | 0              | -2.461715               | -0.970463 | -0.956294 |
| 4                | 5                | 0              | -0.747141               | -0.770163 | -0.500820 |
| 5                | 5                | 0              | -2.401156               | 1.377334  | 0.165938  |
| 6                | 5                | 0              | -3.334941               | -0.158961 | 0.438230  |
| 7                | 5                | 0              | -1.963032               | -1.228842 | 0.779356  |
| 8                | 5                | 0              | -1.966206               | 0.418576  | 1.506128  |
| 9                | 1                | 0              | -1.177446               | 0.763786  | -2.208094 |
| 10               | 1                | 0              | -3.895961               | 0.980990  | -1.959791 |
| 11               | 1                | 0              | 0.178124                | 1.801810  | 0.222303  |
| 12               | 1                | 0              | -2.676502               | -1.876801 | -1.696250 |
| 13               | 1                | 0              | -0.006697               | -1.526988 | -1.064320 |
| 14               | 1                | 0              | -2.548698               | 2.562742  | 0.168918  |
| 15               | 1                | 0              | -4.418395               | -0.378485 | 0.886758  |
| 16               | 1                | 0              | -0.006576               | -1.051243 | 1.773661  |
| 17               | 1                | 0              | -2.023639               | -2.297213 | 1.299818  |
| 18               | 1                | 0              | -2.178597               | 0.632314  | 2.662672  |
| 19               | 6                | 0              | 1.857905                | 0.243319  | 0.063086  |
| 20               | 7                | 0              | 2.873076                | 1.133789  | 0.073858  |
| 21               | 7                | 0              | 2.461270                | -0.948916 | -0.124263 |
| 22               | 1                | 0              | 2.712621                | 2.124542  | 0.206928  |
| 23               | 1                | 0              | 1.922363                | -1.800164 | -0.235916 |
| 24               | 6                | 0              | 3.831923                | -0.814944 | -0.230078 |
| 25               | 6                | 0              | 4.096921                | 0.515200  | -0.098800 |
| 26               | 1                | 0              | 4.489269                | -1.654146 | -0.392960 |
| 27               | 1                | 0              | 5.028875                | 1.057144  | -0.117204 |
| 28               | 5                | 0              | -3.175099               | 0.600776  | -1.094938 |
| 29               | 6                | 0              | -0.559845               | -0.371658 | 1.121379  |

12

Standard orientation:

| Center<br>Number | Atomic<br>Number | Atomic<br>Type | Coordinates (Angstroms) |           |           |
|------------------|------------------|----------------|-------------------------|-----------|-----------|
|                  |                  |                | X                       | Y         | Z         |
| 1                | 6                | 0              | 0.848917                | -0.097197 | 1.288460  |
| 2                | 5                | 0              | -0.090689               | 0.514089  | 0.000000  |
| 3                | 5                | 0              | 2.258964                | -0.989353 | 0.906584  |
| 4                | 5                | 0              | 0.786329                | -1.155555 | 0.000000  |
| 5                | 5                | 0              | 2.230499                | 1.662623  | 0.000000  |
| 6                | 5                | 0              | 3.197481                | 0.208622  | 0.000000  |
| 7                | 5                | 0              | 2.258964                | -0.989353 | -0.906584 |
| 8                | 5                | 0              | 2.258964                | 0.704459  | -1.433490 |
| 9                | 1                | 0              | 0.338292                | -0.382012 | 2.205918  |
| 10               | 1                | 0              | 2.703400                | 0.982158  | 2.504372  |
| 11               | 1                | 0              | -0.132137               | 1.725461  | 0.000000  |
| 12               | 1                | 0              | 2.618213                | -1.887503 | 1.597158  |
| 13               | 1                | 0              | 0.073063                | -2.112978 | 0.000000  |
| 14               | 1                | 0              | 1.930231                | 2.809592  | 0.000000  |
| 15               | 1                | 0              | 4.379212                | 0.382413  | 0.000000  |
| 16               | 1                | 0              | 0.338292                | -0.382012 | -2.205918 |
| 17               | 1                | 0              | 2.618213                | -1.887503 | -1.597158 |
| 18               | 1                | 0              | 2.703400                | 0.982158  | -2.504372 |
| 19               | 6                | 0              | -1.653399               | 0.114074  | 0.000000  |
| 20               | 7                | 0              | -2.632554               | 1.045135  | 0.000000  |
| 21               | 7                | 0              | -2.321839               | -1.060437 | 0.000000  |
| 22               | 1                | 0              | -2.413554               | 2.033198  | 0.000000  |
| 23               | 1                | 0              | -1.831453               | -1.946359 | 0.000000  |
| 24               | 6                | 0              | -3.693505               | -0.872021 | 0.000000  |
| 25               | 6                | 0              | -3.892419               | 0.473358  | 0.000000  |
| 26               | 1                | 0              | -4.393656               | -1.692170 | 0.000000  |
| 27               | 1                | 0              | -4.799211               | 1.056619  | 0.000000  |
| 28               | 5                | 0              | 2.258964                | 0.704459  | 1.433490  |
| 29               | 6                | 0              | 0.848917                | -0.097197 | -1.288460 |

TS12/m-2

Standard orientation:

| Center<br>Number | Atomic<br>Number | Atomic<br>Type | Coordinates (Angstroms) |           |           |
|------------------|------------------|----------------|-------------------------|-----------|-----------|
|                  |                  |                | X                       | Y         | Z         |
| 1                | 6                | 0              | 1.219963                | 0.080535  | 1.284018  |
| 2                | 5                | 0              | 1.235027                | -1.029945 | 0.000000  |
| 3                | 5                | 0              | 1.219963                | 1.745313  | 0.904522  |
| 4                | 5                | 0              | 2.157307                | 0.609490  | 0.000000  |
| 5                | 5                | 0              | -1.162864               | 0.395509  | 0.000000  |
| 6                | 5                | 0              | -0.287503               | 1.911757  | 0.000000  |
| 7                | 5                | 0              | 1.219963                | 1.745313  | -0.904522 |
| 8                | 5                | 0              | -0.221320               | 0.835030  | -1.426151 |
| 9                | 1                | 0              | 1.743004                | -0.179806 | 2.202388  |
| 10               | 1                | 0              | -0.656282               | 1.088256  | 2.511836  |
| 11               | 1                | 0              | 0.254737                | -1.745746 | 0.000000  |
| 12               | 1                | 0              | 1.781107                | 2.537320  | 1.594380  |
| 13               | 1                | 0              | 3.352718                | 0.552583  | 0.000000  |
| 14               | 1                | 0              | -1.483020               | -0.748869 | 0.000000  |

|    |   |   |           |           |           |
|----|---|---|-----------|-----------|-----------|
| 15 | 1 | 0 | -0.938151 | 2.919708  | 0.000000  |
| 16 | 1 | 0 | 1.743004  | -0.179806 | -2.202388 |
| 17 | 1 | 0 | 1.781107  | 2.537320  | -1.594380 |
| 18 | 1 | 0 | -0.656282 | 1.088256  | -2.511836 |
| 19 | 6 | 0 | 2.444054  | -2.103497 | 0.000000  |
| 20 | 7 | 0 | 2.215737  | -3.436258 | 0.000000  |
| 21 | 7 | 0 | 3.792959  | -2.008425 | 0.000000  |
| 22 | 1 | 0 | 1.270362  | -3.796744 | 0.000000  |
| 23 | 1 | 0 | 4.251052  | -1.105057 | 0.000000  |
| 24 | 6 | 0 | 4.399027  | -3.253397 | 0.000000  |
| 25 | 6 | 0 | 3.391289  | -4.166612 | 0.000000  |
| 26 | 1 | 0 | 5.469971  | -3.380210 | 0.000000  |
| 27 | 1 | 0 | 3.411101  | -5.244647 | 0.000000  |
| 28 | 5 | 0 | -0.221320 | 0.835030  | 1.426151  |
| 29 | 6 | 0 | 1.219963  | 0.080535  | -1.284018 |
| 30 | 6 | 0 | -3.286988 | 1.277610  | 0.000000  |
| 31 | 7 | 0 | -3.609062 | 2.587616  | 0.000000  |
| 32 | 6 | 0 | -4.980569 | 2.803978  | 0.000000  |
| 33 | 1 | 0 | -5.421937 | 3.788296  | 0.000000  |
| 34 | 7 | 0 | -4.495110 | 0.665923  | 0.000000  |
| 35 | 1 | 0 | -4.588265 | -0.338999 | 0.000000  |
| 36 | 6 | 0 | -5.551925 | 1.571628  | 0.000000  |
| 37 | 1 | 0 | -6.587635 | 1.269771  | 0.000000  |
| 38 | 1 | 0 | -2.883424 | 3.294201  | 0.000000  |

m-2

Standard orientation:

| Center<br>Number | Atomic<br>Number | Atomic<br>Type | Coordinates (Angstroms) |           |           |
|------------------|------------------|----------------|-------------------------|-----------|-----------|
|                  |                  |                | X                       | Y         | Z         |
| 1                | 6                | 0              | 0.724849                | 0.874314  | 1.280872  |
| 2                | 5                | 0              | -0.245383               | 1.403745  | 0.000000  |
| 3                | 5                | 0              | 2.204564                | 0.107302  | 0.898750  |
| 4                | 5                | 0              | 0.724849                | -0.751606 | 1.413950  |
| 5                | 5                | 0              | 0.724849                | -0.751606 | -1.413950 |
| 6                | 1                | 0              | 0.740309                | 1.455227  | 2.201240  |
| 7                | 1                | 0              | 2.146635                | 2.547438  | 0.000000  |
| 8                | 1                | 0              | -1.339848               | 0.869420  | 0.000000  |
| 9                | 1                | 0              | 3.162782                | 0.232769  | 1.595061  |
| 10               | 1                | 0              | 0.748807                | -1.249042 | 2.504332  |
| 11               | 1                | 0              | 0.740309                | 1.455227  | -2.201240 |
| 12               | 1                | 0              | 3.162782                | 0.232769  | -1.595061 |
| 13               | 1                | 0              | -1.112151               | -0.925550 | 0.000000  |
| 14               | 1                | 0              | 2.302343                | -2.326168 | 0.000000  |
| 15               | 1                | 0              | 0.748807                | -1.249042 | -2.504332 |
| 16               | 6                | 0              | -0.631667               | 2.975412  | 0.000000  |
| 17               | 7                | 0              | -1.916646               | 3.397144  | 0.000000  |
| 18               | 7                | 0              | 0.082751                | 4.123600  | 0.000000  |
| 19               | 1                | 0              | -2.676890               | 2.729801  | 0.000000  |
| 20               | 1                | 0              | 1.095631                | 4.104385  | 0.000000  |
| 21               | 6                | 0              | -0.734150               | 5.241485  | 0.000000  |
| 22               | 6                | 0              | -2.012671               | 4.777993  | 0.000000  |



|    |   |   |           |           |           |
|----|---|---|-----------|-----------|-----------|
| 23 | 1 | 0 | -0.345471 | 6.247452  | 0.000000  |
| 24 | 1 | 0 | -2.956232 | 5.299791  | 0.000000  |
| 25 | 5 | 0 | 1.634596  | 1.464817  | 0.000000  |
| 26 | 5 | 0 | -0.086774 | -1.549754 | 0.000000  |
| 27 | 5 | 0 | 1.661189  | -1.307327 | 0.000000  |
| 28 | 6 | 0 | 0.724849  | 0.874314  | -1.280872 |
| 29 | 5 | 0 | 2.204564  | 0.107302  | -0.898750 |
| 30 | 6 | 0 | -0.415792 | -3.077144 | 0.000000  |
| 31 | 7 | 0 | -1.659499 | -3.627680 | 0.000000  |
| 32 | 1 | 0 | -2.489542 | -3.053598 | 0.000000  |
| 33 | 6 | 0 | -1.613854 | -5.014927 | 0.000000  |
| 34 | 1 | 0 | -2.500618 | -5.628263 | 0.000000  |
| 35 | 7 | 0 | 0.407303  | -4.155052 | 0.000000  |
| 36 | 1 | 0 | 1.412057  | -4.031356 | 0.000000  |
| 37 | 6 | 0 | -0.297747 | -5.348230 | 0.000000  |
| 38 | 1 | 0 | 0.187761  | -6.311009 | 0.000000  |

-----

TS5/14

Standard orientation:

| Center<br>Number | Atomic<br>Number | Atomic<br>Type | Coordinates (Angstroms) |           |           |
|------------------|------------------|----------------|-------------------------|-----------|-----------|
|                  |                  |                | X                       | Y         | Z         |
| 1                | 5                | 0              | -1.180602               | 0.316316  | -0.834447 |
| 2                | 5                | 0              | -0.885612               | 0.564360  | 0.927745  |
| 3                | 5                | 0              | 1.667745                | 2.007228  | 0.629647  |
| 4                | 5                | 0              | 0.844234                | 0.533866  | 1.283865  |
| 5                | 5                | 0              | 1.823528                | 0.400801  | -0.156401 |
| 6                | 5                | 0              | 0.450083                | 2.514331  | -0.698731 |
| 7                | 5                | 0              | -0.033330               | 2.095305  | 1.059078  |
| 8                | 6                | 0              | 1.717837                | 1.681234  | -0.988359 |
| 9                | 1                | 0              | 0.141027                | -1.776028 | 0.251641  |
| 10               | 1                | 0              | -1.611066               | -0.003619 | -1.898139 |
| 11               | 1                | 0              | -1.710490               | 0.304279  | 1.747068  |
| 12               | 1                | 0              | 2.498567                | 2.567437  | 1.281515  |
| 13               | 1                | 0              | 1.171895                | 0.042289  | 2.323786  |
| 14               | 1                | 0              | -1.878700               | 2.414498  | -0.306029 |
| 15               | 1                | 0              | 0.202420                | -0.344897 | -1.140217 |
| 16               | 1                | 0              | 0.325018                | 3.648151  | -1.062393 |
| 17               | 1                | 0              | -0.421969               | 2.848200  | 1.897918  |
| 18               | 1                | 0              | 2.520402                | 2.068882  | -1.615027 |
| 19               | 6                | 0              | 3.104310                | -0.490161 | -0.108508 |
| 20               | 7                | 0              | 3.175510                | -1.790061 | 0.249418  |
| 21               | 1                | 0              | 2.343756                | -2.299190 | 0.524928  |
| 22               | 6                | 0              | 4.474513                | -2.266864 | 0.180798  |
| 23               | 1                | 0              | 4.735640                | -3.283398 | 0.427040  |
| 24               | 7                | 0              | 4.378307                | -0.153996 | -0.413925 |
| 25               | 1                | 0              | 4.630615                | 0.782758  | -0.698701 |
| 26               | 6                | 0              | 5.241125                | -1.225165 | -0.237545 |
| 27               | 1                | 0              | 6.301071                | -1.154696 | -0.421707 |
| 28               | 6                | 0              | -3.485130               | -0.323796 | -0.248869 |
| 29               | 7                | 0              | -4.383517               | -0.747737 | -1.178682 |
| 30               | 1                | 0              | -4.171757               | -0.729744 | -2.166112 |

|    |   |   |           |           |           |
|----|---|---|-----------|-----------|-----------|
| 31 | 6 | 0 | -5.581463 | -1.195015 | -0.630035 |
| 32 | 1 | 0 | -6.405237 | -1.564609 | -1.221394 |
| 33 | 7 | 0 | -4.170808 | -0.525928 | 0.906281  |
| 34 | 1 | 0 | -3.752376 | -0.308256 | 1.800554  |
| 35 | 6 | 0 | -5.443002 | -1.051963 | 0.713564  |
| 36 | 1 | 0 | -6.123132 | -1.273530 | 1.521799  |
| 37 | 6 | 0 | -1.006689 | 1.767519  | -0.266212 |
| 38 | 5 | 0 | 0.129730  | -0.590048 | 0.053807  |

14

Standard orientation:

| Center<br>Number | Atomic<br>Number | Atomic<br>Type | Coordinates (Angstroms) |           |           |
|------------------|------------------|----------------|-------------------------|-----------|-----------|
|                  |                  |                | X                       | Y         | Z         |
| 1                | 5                | 0              | 2.493645                | 1.192770  | -1.145912 |
| 2                | 5                | 0              | 2.421535                | 1.215242  | 0.596808  |
| 3                | 5                | 0              | 0.887474                | -1.295547 | 0.870249  |
| 4                | 5                | 0              | 0.901138                | 0.467858  | 1.145620  |
| 5                | 5                | 0              | -0.057530               | -0.181378 | -0.158449 |
| 6                | 5                | 0              | 2.156725                | -1.465834 | -0.492020 |
| 7                | 5                | 0              | 2.442972                | -0.500094 | 1.069588  |
| 8                | 6                | 0              | 0.655670                | -1.378839 | -0.787654 |
| 9                | 1                | 0              | 0.340078                | 2.497728  | -0.472595 |
| 10               | 1                | 0              | 3.047301                | 1.906741  | -1.918139 |
| 11               | 1                | 0              | 3.056144                | 2.007221  | 1.216044  |
| 12               | 1                | 0              | 0.445122                | -2.050334 | 1.681744  |
| 13               | 1                | 0              | 0.375019                | 0.959907  | 2.099150  |
| 14               | 1                | 0              | 4.164228                | -0.158189 | -0.425875 |
| 15               | 1                | 0              | 1.219829                | 1.025726  | -1.544609 |
| 16               | 1                | 0              | 2.814543                | -2.444552 | -0.681420 |
| 17               | 1                | 0              | 3.169787                | -0.817665 | 1.957348  |
| 18               | 1                | 0              | 0.129774                | -2.214553 | -1.249284 |
| 19               | 6                | 0              | -1.613787               | -0.038351 | -0.092457 |
| 20               | 7                | 0              | -2.321139               | 1.100287  | 0.065020  |
| 21               | 1                | 0              | -1.861504               | 1.998883  | 0.148778  |
| 22               | 6                | 0              | -3.684371               | 0.854616  | 0.086962  |
| 23               | 1                | 0              | -4.415149               | 1.638585  | 0.203184  |
| 24               | 7                | 0              | -2.551227               | -1.008353 | -0.177680 |
| 25               | 1                | 0              | -2.307930               | -1.984844 | -0.276818 |
| 26               | 6                | 0              | -3.831420               | -0.488126 | -0.064305 |
| 27               | 1                | 0              | -4.714961               | -1.104829 | -0.100886 |
| 28               | 6                | 0              | 3.087199                | -0.019349 | -0.387483 |
| 29               | 5                | 0              | 0.946949                | 1.470368  | -0.361559 |

TS14/15

Standard orientation:

| Center<br>Number | Atomic<br>Number | Atomic<br>Type | Coordinates (Angstroms) |           |           |
|------------------|------------------|----------------|-------------------------|-----------|-----------|
|                  |                  |                | X                       | Y         | Z         |
| 1                | 5                | 0              | -2.341268               | -1.262887 | -1.093986 |
| 2                | 5                | 0              | -2.385674               | -1.203028 | 0.708568  |

|    |   |   |           |           |           |
|----|---|---|-----------|-----------|-----------|
| 3  | 5 | 0 | -0.925743 | 1.345401  | 0.719913  |
| 4  | 5 | 0 | -0.924285 | -0.427222 | 1.216470  |
| 5  | 5 | 0 | 0.040577  | 0.116482  | -0.145769 |
| 6  | 5 | 0 | -2.257038 | 1.344661  | -0.621258 |
| 7  | 5 | 0 | -2.465815 | 0.517281  | 1.051717  |
| 8  | 6 | 0 | -0.733756 | 1.362128  | -0.881193 |
| 9  | 1 | 0 | -0.189415 | -2.450521 | -0.287241 |
| 10 | 1 | 0 | -2.866885 | -1.935926 | -1.927025 |
| 11 | 1 | 0 | -3.015523 | -1.996034 | 1.333960  |
| 12 | 1 | 0 | -0.442268 | 2.163214  | 1.443772  |
| 13 | 1 | 0 | -0.391045 | -0.716128 | 2.244225  |
| 14 | 1 | 0 | -4.169668 | 0.007280  | -0.459749 |
| 15 | 1 | 0 | -0.584681 | -0.055537 | -1.266512 |
| 16 | 1 | 0 | -2.935440 | 2.288381  | -0.888751 |
| 17 | 1 | 0 | -3.192878 | 0.913392  | 1.906528  |
| 18 | 1 | 0 | -0.180034 | 2.126345  | -1.416268 |
| 19 | 6 | 0 | 1.605868  | 0.036441  | -0.102981 |
| 20 | 7 | 0 | 2.327339  | -1.099053 | -0.107411 |
| 21 | 1 | 0 | 1.865599  | -2.002513 | -0.159354 |
| 22 | 6 | 0 | 3.681402  | -0.837329 | -0.003645 |
| 23 | 1 | 0 | 4.425898  | -1.616911 | 0.010610  |
| 24 | 7 | 0 | 2.517421  | 1.026168  | -0.005128 |
| 25 | 1 | 0 | 2.254929  | 2.001193  | 0.060066  |
| 26 | 6 | 0 | 3.804244  | 0.516345  | 0.063271  |
| 27 | 1 | 0 | 4.675021  | 1.146065  | 0.150127  |
| 28 | 6 | 0 | -3.092439 | -0.104647 | -0.372050 |
| 29 | 5 | 0 | -0.892526 | -1.470635 | -0.271061 |

15

Standard orientation:

| Center<br>Number | Atomic<br>Number | Atomic<br>Type | Coordinates (Angstroms) |           |           |
|------------------|------------------|----------------|-------------------------|-----------|-----------|
|                  |                  |                | X                       | Y         | Z         |
| 1                | 5                | 0              | -2.085711               | -0.779042 | -1.410248 |
| 2                | 5                | 0              | -2.335881               | -1.419550 | 0.247022  |
| 3                | 5                | 0              | -1.002533               | 0.981641  | 1.022876  |
| 4                | 5                | 0              | -0.913611               | -0.793200 | 1.079871  |
| 5                | 5                | 0              | 0.001053                | 0.106625  | -0.185180 |
| 6                | 5                | 0              | -2.347282               | 1.418163  | -0.041452 |
| 7                | 5                | 0              | -2.500516               | 0.099986  | 1.157392  |
| 8                | 6                | 0              | -0.731867               | 1.543885  | -0.592427 |
| 9                | 1                | 0              | -0.128326               | -2.375895 | -0.843319 |
| 10               | 1                | 0              | -2.349760               | -0.904601 | -2.566742 |
| 11               | 1                | 0              | -3.012541               | -2.370255 | 0.483160  |
| 12               | 1                | 0              | -0.532684               | 1.743097  | 1.806192  |
| 13               | 1                | 0              | -0.403039               | -1.294866 | 2.036327  |
| 14               | 1                | 0              | -4.117861               | 0.024896  | -0.593481 |
| 15               | 1                | 0              | -0.972502               | 1.446872  | -1.646056 |
| 16               | 1                | 0              | -3.009204               | 2.406276  | 0.009948  |
| 17               | 1                | 0              | -3.237224               | 0.176303  | 2.087322  |
| 18               | 1                | 0              | -0.240020               | 2.506771  | -0.435366 |
| 19               | 6                | 0              | 1.564056                | 0.051422  | -0.092419 |

|    |   |   |           |           |           |
|----|---|---|-----------|-----------|-----------|
| 20 | 7 | 0 | 2.299137  | -1.067925 | 0.075444  |
| 21 | 1 | 0 | 1.849979  | -1.975527 | 0.128550  |
| 22 | 6 | 0 | 3.652890  | -0.789509 | 0.114660  |
| 23 | 1 | 0 | 4.401455  | -1.554903 | 0.241933  |
| 24 | 7 | 0 | 2.479447  | 1.044876  | -0.170008 |
| 25 | 1 | 0 | 2.219087  | 2.014343  | -0.285726 |
| 26 | 6 | 0 | 3.771177  | 0.556479  | -0.038840 |
| 27 | 1 | 0 | 4.640294  | 1.193633  | -0.069588 |
| 28 | 6 | 0 | -3.045782 | -0.018006 | -0.425209 |
| 29 | 5 | 0 | -0.779635 | -1.402708 | -0.567442 |

-----  
TS6/15

Standard orientation:

| Center<br>Number | Atomic<br>Number | Atomic<br>Type | Coordinates (Angstroms) |           |           |
|------------------|------------------|----------------|-------------------------|-----------|-----------|
|                  |                  |                | X                       | Y         | Z         |
| 1                | 5                | 0              | -0.853177               | 0.955565  | -0.742677 |
| 2                | 5                | 0              | -0.823372               | 1.160421  | 1.056076  |
| 3                | 5                | 0              | 1.866853                | 1.987705  | 0.578350  |
| 4                | 5                | 0              | 0.860858                | 0.787939  | 1.424031  |
| 5                | 5                | 0              | 1.598553                | 0.372324  | -0.164111 |
| 6                | 5                | 0              | 0.794665                | 2.931805  | -0.462161 |
| 7                | 5                | 0              | 0.328680                | 2.508309  | 1.208613  |
| 8                | 6                | 0              | 1.794571                | 1.705102  | -1.135283 |
| 9                | 1                | 0              | -0.242440               | -1.329474 | 0.378228  |
| 10               | 1                | 0              | -1.329161               | 0.779198  | -1.816675 |
| 11               | 1                | 0              | -1.781019               | 1.079212  | 1.752954  |
| 12               | 1                | 0              | 2.949896                | 2.362071  | 0.897534  |
| 13               | 1                | 0              | 1.255791                | 0.356644  | 2.468836  |
| 14               | 1                | 0              | -1.501366               | 3.130408  | -0.200074 |
| 15               | 1                | 0              | 1.166823                | 1.535034  | -2.006480 |
| 16               | 1                | 0              | 0.964956                | 4.056781  | -0.814915 |
| 17               | 1                | 0              | 0.196662                | 3.326268  | 2.061617  |
| 18               | 1                | 0              | 2.784118                | 2.025868  | -1.470949 |
| 19               | 6                | 0              | 2.713921                | -0.721072 | -0.141052 |
| 20               | 7                | 0              | 2.762868                | -1.796089 | 0.676645  |
| 21               | 1                | 0              | 2.042321                | -1.954472 | 1.370128  |
| 22               | 6                | 0              | 3.879564                | -2.575543 | 0.430895  |
| 23               | 1                | 0              | 4.094399                | -3.475758 | 0.983970  |
| 24               | 7                | 0              | 3.817406                | -0.841918 | -0.915705 |
| 25               | 1                | 0              | 4.049332                | -0.167242 | -1.631128 |
| 26               | 6                | 0              | 4.553575                | -1.970398 | -0.582376 |
| 27               | 1                | 0              | 5.468120                | -2.238922 | -1.086045 |
| 28               | 6                | 0              | -3.677051               | 0.011240  | -0.350162 |
| 29               | 7                | 0              | -5.025812               | -0.156116 | -0.515154 |
| 30               | 1                | 0              | -5.620427               | 0.594612  | -0.831360 |
| 31               | 6                | 0              | -5.481722               | -1.434932 | -0.201328 |
| 32               | 1                | 0              | -6.516694               | -1.733211 | -0.273465 |
| 33               | 7                | 0              | -3.319237               | -1.233730 | 0.079732  |
| 34               | 1                | 0              | -2.353250               | -1.443625 | 0.298841  |
| 35               | 6                | 0              | -4.378865               | -2.127214 | 0.181794  |
| 36               | 1                | 0              | -4.265862               | -3.149651 | 0.509215  |

|    |   |   |           |           |           |
|----|---|---|-----------|-----------|-----------|
| 37 | 6 | 0 | -0.706908 | 2.396087  | -0.111932 |
| 38 | 5 | 0 | -0.011317 | -0.155743 | 0.219440  |

TS15/16

Standard orientation:

| Center<br>Number | Atomic<br>Number | Atomic<br>Type | Coordinates (Angstroms) |           |           |
|------------------|------------------|----------------|-------------------------|-----------|-----------|
|                  |                  |                | X                       | Y         | Z         |
| 1                | 5                | 0              | -0.885819               | -1.331196 | -0.190146 |
| 2                | 5                | 0              | -2.395704               | -1.271883 | 0.737349  |
| 3                | 5                | 0              | -1.897051               | 1.627107  | -0.422952 |
| 4                | 5                | 0              | -2.131583               | 0.549006  | 1.266264  |
| 5                | 5                | 0              | -0.069224               | 0.337615  | 0.095098  |
| 6                | 5                | 0              | -1.507291               | -0.005710 | -1.393880 |
| 7                | 5                | 0              | -2.963368               | 0.262161  | -0.324890 |
| 8                | 6                | 0              | -0.419299               | 1.902227  | 0.122018  |
| 9                | 1                | 0              | -0.359462               | -1.044481 | 2.348152  |
| 10               | 1                | 0              | -0.219725               | -2.266007 | -0.534365 |
| 11               | 1                | 0              | -3.112320               | -2.046076 | 1.286602  |
| 12               | 1                | 0              | -2.551922               | 2.515363  | -0.890966 |
| 13               | 1                | 0              | -2.497161               | 1.281716  | 2.130729  |
| 14               | 1                | 0              | -2.913030               | -1.879810 | -1.468961 |
| 15               | 1                | 0              | 0.054844                | 2.543232  | -0.645833 |
| 16               | 1                | 0              | -1.318669               | 0.118794  | -2.563812 |
| 17               | 1                | 0              | -4.079468               | 0.515542  | -0.649245 |
| 18               | 1                | 0              | -0.332052               | 2.419816  | 1.085561  |
| 19               | 6                | 0              | 1.497680                | 0.028465  | -0.003489 |
| 20               | 7                | 0              | 2.195906                | -1.128680 | -0.046020 |
| 21               | 1                | 0              | 1.724880                | -2.025291 | -0.048586 |
| 22               | 6                | 0              | 3.558144                | -0.902415 | -0.083246 |
| 23               | 1                | 0              | 4.281729                | -1.701325 | -0.118407 |
| 24               | 7                | 0              | 2.449686                | 0.987798  | -0.014375 |
| 25               | 1                | 0              | 2.198418                | 1.967846  | 0.019782  |
| 26               | 6                | 0              | 3.721688                | 0.449785  | -0.064388 |
| 27               | 1                | 0              | 4.613723                | 1.055288  | -0.079533 |
| 28               | 6                | 0              | -2.367602               | -1.181452 | -0.847228 |
| 29               | 5                | 0              | -0.940478               | -0.616718 | 1.395085  |

16

Standard orientation:

| Center<br>Number | Atomic<br>Number | Atomic<br>Type | Coordinates (Angstroms) |           |           |
|------------------|------------------|----------------|-------------------------|-----------|-----------|
|                  |                  |                | X                       | Y         | Z         |
| 1                | 5                | 0              | -0.986511               | -1.264371 | 0.607743  |
| 2                | 5                | 0              | -2.728816               | -0.890150 | 0.697162  |
| 3                | 5                | 0              | -1.363780               | 1.266227  | -0.902330 |
| 4                | 5                | 0              | -2.610241               | 0.901663  | 0.602973  |
| 5                | 5                | 0              | -0.107594               | 0.396490  | 0.165178  |
| 6                | 5                | 0              | -0.937609               | -0.508558 | -1.207434 |
| 7                | 5                | 0              | -2.786271               | 0.038766  | -0.858307 |
| 8                | 6                | 0              | -0.401069               | 2.002075  | 0.126544  |

|    |   |   |           |           |           |
|----|---|---|-----------|-----------|-----------|
| 9  | 1 | 0 | -1.178706 | 0.175102  | 2.687687  |
| 10 | 1 | 0 | -0.317218 | -2.212752 | 0.905232  |
| 11 | 1 | 0 | -3.596740 | -1.495363 | 1.238895  |
| 12 | 1 | 0 | -1.311436 | 1.698935  | -2.022550 |
| 13 | 1 | 0 | -3.355573 | 1.776053  | 0.918611  |
| 14 | 1 | 0 | -2.318156 | -2.351315 | -1.141166 |
| 15 | 1 | 0 | 0.333220  | 2.639182  | -0.402707 |
| 16 | 1 | 0 | -0.356533 | -0.841333 | -2.196289 |
| 17 | 1 | 0 | -3.585396 | 0.121705  | -1.734841 |
| 18 | 1 | 0 | -0.733747 | 2.482222  | 1.036213  |
| 19 | 6 | 0 | 1.453031  | 0.066879  | 0.076896  |
| 20 | 7 | 0 | 2.084215  | -1.128576 | 0.089030  |
| 21 | 1 | 0 | 1.567018  | -1.995022 | 0.180322  |
| 22 | 6 | 0 | 3.456597  | -0.985052 | 0.004288  |
| 23 | 1 | 0 | 4.131598  | -1.825888 | 0.007600  |
| 24 | 7 | 0 | 2.456891  | 0.966570  | -0.014145 |
| 25 | 1 | 0 | 2.271224  | 1.961231  | -0.028507 |
| 26 | 6 | 0 | 3.695000  | 0.352597  | -0.068651 |
| 27 | 1 | 0 | 4.617356  | 0.905632  | -0.145216 |
| 28 | 6 | 0 | -2.047977 | -1.430439 | -0.640655 |
| 29 | 5 | 0 | -1.456808 | 0.071791  | 1.531413  |

-----  
TS16/17

Standard orientation:

| Center<br>Number | Atomic<br>Number | Atomic<br>Type | Coordinates (Angstroms) |           |           |
|------------------|------------------|----------------|-------------------------|-----------|-----------|
|                  |                  |                | X                       | Y         | Z         |
| 1                | 5                | 0              | 1.214422                | -0.375551 | -1.314825 |
| 2                | 5                | 0              | 2.892611                | -0.025445 | -0.755915 |
| 3                | 5                | 0              | 1.054136                | -0.180664 | 1.545325  |
| 4                | 5                | 0              | 2.243658                | 1.050994  | 0.782404  |
| 5                | 5                | 0              | 0.032428                | 0.218504  | 0.093468  |
| 6                | 5                | 0              | 0.880963                | -1.362581 | 0.314750  |
| 7                | 5                | 0              | 2.434956                | -0.923739 | 1.005966  |
| 8                | 6                | 0              | 0.649497                | 1.685170  | 0.113721  |
| 9                | 1                | 0              | 2.446169                | 2.268439  | -1.528373 |
| 10               | 1                | 0              | 0.854072                | -0.660907 | -2.414503 |
| 11               | 1                | 0              | 3.931857                | 0.058086  | -1.329590 |
| 12               | 1                | 0              | 0.679050                | -0.107796 | 2.672874  |
| 13               | 1                | 0              | 2.872160                | 1.806053  | 1.453868  |
| 14               | 1                | 0              | 2.678278                | -2.319591 | -0.942440 |
| 15               | 1                | 0              | 0.542904                | 2.366546  | 0.967439  |
| 16               | 1                | 0              | 0.204862                | -2.347462 | 0.408234  |
| 17               | 1                | 0              | 3.300016                | -1.373691 | 1.686795  |
| 18               | 1                | 0              | 0.456390                | 2.329732  | -0.777414 |
| 19               | 6                | 0              | -1.516357               | 0.032626  | 0.020368  |
| 20               | 7                | 0              | -2.259233               | -1.097908 | -0.081622 |
| 21               | 1                | 0              | -1.827769               | -2.012586 | -0.094447 |
| 22               | 6                | 0              | -3.615795               | -0.819712 | -0.126834 |
| 23               | 1                | 0              | -4.365043               | -1.590970 | -0.206735 |
| 24               | 7                | 0              | -2.440111               | 1.027400  | 0.030012  |
| 25               | 1                | 0              | -2.176032               | 1.999504  | 0.104305  |

|    |   |   |           |           |           |
|----|---|---|-----------|-----------|-----------|
| 26 | 6 | 0 | -3.732961 | 0.531468  | -0.055551 |
| 27 | 1 | 0 | -4.602580 | 1.168667  | -0.060102 |
| 28 | 6 | 0 | 2.232320  | -1.420524 | -0.537541 |
| 29 | 5 | 0 | 2.006997  | 1.369556  | -0.883898 |

17

Standard orientation:

| Center<br>Number | Atomic<br>Number | Atomic<br>Type | Coordinates (Angstroms) |           |           |
|------------------|------------------|----------------|-------------------------|-----------|-----------|
|                  |                  |                | X                       | Y         | Z         |
| 1                | 5                | 0              | 0.922601                | -0.887367 | -1.203506 |
| 2                | 5                | 0              | 2.866897                | 0.012848  | -0.731816 |
| 3                | 5                | 0              | 1.038773                | 0.145340  | 1.400162  |
| 4                | 5                | 0              | 2.404165                | 1.037647  | 0.617520  |
| 5                | 5                | 0              | 0.019176                | 0.025550  | -0.056527 |
| 6                | 5                | 0              | 0.928036                | -1.400726 | 0.553919  |
| 7                | 5                | 0              | 2.543608                | -0.727555 | 0.916999  |
| 8                | 6                | 0              | 0.809053                | 1.400054  | 0.294840  |
| 9                | 1                | 0              | 2.517337                | 2.668507  | -1.007602 |
| 10               | 1                | 0              | 0.545685                | -1.334121 | -2.241924 |
| 11               | 1                | 0              | 3.903384                | -0.016018 | -1.315882 |
| 12               | 1                | 0              | 0.684352                | 0.296927  | 2.525339  |
| 13               | 1                | 0              | 3.098647                | 1.792311  | 1.215658  |
| 14               | 1                | 0              | 2.714722                | -2.342594 | -0.819724 |
| 15               | 1                | 0              | 0.345562                | 2.237300  | 0.819713  |
| 16               | 1                | 0              | 0.445811                | -2.403349 | 0.990946  |
| 17               | 1                | 0              | 3.331753                | -1.206397 | 1.665075  |
| 18               | 1                | 0              | 1.381887                | 1.388324  | -2.036058 |
| 19               | 6                | 0              | -1.537275               | 0.004534  | -0.022766 |
| 20               | 7                | 0              | -2.362750               | -1.068480 | -0.006145 |
| 21               | 1                | 0              | -2.009134               | -2.014491 | 0.047896  |
| 22               | 6                | 0              | -3.695412               | -0.687723 | -0.023116 |
| 23               | 1                | 0              | -4.503949               | -1.400765 | -0.011061 |
| 24               | 7                | 0              | -2.375050               | 1.066629  | -0.054564 |
| 25               | 1                | 0              | -2.032808               | 2.016846  | -0.100975 |
| 26               | 6                | 0              | -3.704089               | 0.670327  | -0.055228 |
| 27               | 1                | 0              | -4.520908               | 1.373430  | -0.079953 |
| 28               | 6                | 0              | 2.186459                | -1.450083 | -0.503730 |
| 29               | 5                | 0              | 1.858712                | 1.661142  | -0.970048 |

TS17/13

Standard orientation:

| Center<br>Number | Atomic<br>Number | Atomic<br>Type | Coordinates (Angstroms) |           |           |
|------------------|------------------|----------------|-------------------------|-----------|-----------|
|                  |                  |                | X                       | Y         | Z         |
| 1                | 5                | 0              | -2.509823               | -0.204343 | 1.616961  |
| 2                | 5                | 0              | -3.322056               | 0.063871  | 0.017049  |
| 3                | 5                | 0              | -0.731829               | 0.046281  | -1.340416 |
| 4                | 5                | 0              | -2.224522               | 1.009088  | -0.918677 |
| 5                | 5                | 0              | 0.251045                | -0.092644 | 0.025335  |
| 6                | 5                | 0              | -0.802752               | -1.350182 | -0.048541 |

|    |   |   |           |           |           |
|----|---|---|-----------|-----------|-----------|
| 7  | 5 | 0 | -2.275671 | -0.795549 | -1.089531 |
| 8  | 6 | 0 | -0.749139 | 1.283799  | -0.141976 |
| 9  | 1 | 0 | -2.598138 | 2.399860  | 1.219866  |
| 10 | 1 | 0 | -2.904411 | -0.481828 | 2.708490  |
| 11 | 1 | 0 | -4.503946 | 0.049540  | -0.113989 |
| 12 | 1 | 0 | -0.279907 | 0.263933  | -2.420238 |
| 13 | 1 | 0 | -2.557270 | 1.814910  | -1.725546 |
| 14 | 1 | 0 | -2.864872 | -2.263242 | 0.619497  |
| 15 | 1 | 0 | -0.316907 | 2.264588  | -0.323575 |
| 16 | 1 | 0 | -0.421976 | -2.470130 | -0.255960 |
| 17 | 1 | 0 | -2.734845 | -1.449513 | -1.970333 |
| 18 | 1 | 0 | -0.587705 | 0.907912  | 0.936001  |
| 19 | 6 | 0 | 1.768988  | -0.015306 | 0.052407  |
| 20 | 7 | 0 | 2.603826  | -1.093135 | 0.045774  |
| 21 | 1 | 0 | 2.247952  | -2.038451 | 0.013420  |
| 22 | 6 | 0 | 3.935104  | -0.710043 | 0.100817  |
| 23 | 1 | 0 | 4.743249  | -1.423629 | 0.100614  |
| 24 | 7 | 0 | 2.616732  | 1.051629  | 0.128282  |
| 25 | 1 | 0 | 2.300370  | 2.009713  | 0.129884  |
| 26 | 6 | 0 | 3.946831  | 0.644467  | 0.156997  |
| 27 | 1 | 0 | 4.764367  | 1.344318  | 0.219248  |
| 28 | 6 | 0 | -2.412740 | -1.282920 | 0.493755  |
| 29 | 5 | 0 | -2.337217 | 1.291994  | 0.872266  |

p-2a

Standard orientation:

| Center<br>Number | Atomic<br>Number | Atomic<br>Type | Coordinates (Angstroms) |           |           |
|------------------|------------------|----------------|-------------------------|-----------|-----------|
|                  |                  |                | X                       | Y         | Z         |
| 1                | 6                | 0              | 0.933608                | 0.813293  | 1.163632  |
| 2                | 5                | 0              | 1.566475                | -0.119522 | -0.018531 |
| 3                | 5                | 0              | 1.421269                | 1.616725  | -0.292067 |
| 4                | 5                | 0              | -0.699825               | 0.661547  | 1.330304  |
| 5                | 5                | 0              | 0.044426                | 2.167760  | 0.714062  |
| 6                | 5                | 0              | 0.732537                | 0.662000  | -1.576541 |
| 7                | 5                | 0              | -1.509794               | -0.326102 | -0.208025 |
| 8                | 5                | 0              | -0.058533               | 2.204052  | -1.051341 |
| 9                | 5                | 0              | -1.384033               | 1.622860  | -0.104779 |
| 10               | 6                | 0              | -0.837911               | 0.750027  | -1.410104 |
| 11               | 1                | 0              | 1.516620                | 1.002874  | 2.061111  |
| 12               | 1                | 0              | 0.933185                | -1.096640 | -0.321712 |
| 13               | 1                | 0              | 2.447475                | 2.222483  | -0.297035 |
| 14               | 1                | 0              | -1.245309               | 0.708355  | 2.387915  |
| 15               | 1                | 0              | 0.015215                | 3.098276  | 1.447829  |
| 16               | 1                | 0              | 1.237610                | 0.480840  | -2.637816 |
| 17               | 1                | 0              | -1.069848               | -1.391377 | -0.588313 |
| 18               | 1                | 0              | -0.189478               | 3.174696  | -1.717463 |
| 19               | 1                | 0              | -2.437174               | 2.174490  | -0.113713 |
| 20               | 1                | 0              | -1.455935               | 0.729008  | -2.305577 |
| 21               | 6                | 0              | -3.093081               | -0.565102 | -0.017572 |
| 22               | 7                | 0              | -4.064647               | 0.197297  | 0.519852  |
| 23               | 1                | 0              | -3.887190               | 1.135282  | 0.860469  |



|    |   |   |           |           |           |
|----|---|---|-----------|-----------|-----------|
| 24 | 6 | 0 | -5.283599 | -0.450494 | 0.512408  |
| 25 | 1 | 0 | -6.184098 | 0.000079  | 0.898945  |
| 26 | 7 | 0 | -3.719005 | -1.709125 | -0.365333 |
| 27 | 1 | 0 | -3.233158 | -2.485914 | -0.796376 |
| 28 | 6 | 0 | -5.064493 | -1.669405 | -0.055306 |
| 29 | 1 | 0 | -5.735812 | -2.487960 | -0.261165 |
| 30 | 6 | 0 | 3.106435  | -0.516536 | 0.055031  |
| 31 | 7 | 0 | 4.201782  | 0.242570  | 0.266531  |
| 32 | 1 | 0 | 4.151015  | 1.250282  | 0.352916  |
| 33 | 6 | 0 | 5.358174  | -0.517323 | 0.272358  |
| 34 | 1 | 0 | 6.335792  | -0.087187 | 0.421317  |
| 35 | 7 | 0 | 3.591657  | -1.770832 | -0.068010 |
| 36 | 1 | 0 | 2.994506  | -2.570348 | -0.233069 |
| 37 | 6 | 0 | 4.969926  | -1.802990 | 0.058367  |
| 38 | 1 | 0 | 5.541314  | -2.714563 | -0.014051 |
| 39 | 1 | 0 | -0.900206 | -0.557462 | 0.946213  |

p-2a/19a

Standard orientation:

| Center<br>Number | Atomic<br>Number | Atomic<br>Type | Coordinates (Angstroms) |           |           |
|------------------|------------------|----------------|-------------------------|-----------|-----------|
|                  |                  |                | X                       | Y         | Z         |
| 1                | 6                | 0              | 0.864105                | 0.734761  | 1.134797  |
| 2                | 5                | 0              | 1.537726                | -0.138259 | -0.061452 |
| 3                | 5                | 0              | 1.389232                | 1.602593  | -0.274579 |
| 4                | 5                | 0              | -0.783058               | 0.700729  | 1.280253  |
| 5                | 5                | 0              | 0.046588                | 2.184089  | 0.751625  |
| 6                | 5                | 0              | 0.694527                | 0.646220  | -1.553384 |
| 7                | 5                | 0              | -1.505661               | -0.088094 | -0.104281 |
| 8                | 5                | 0              | -0.068990               | 2.184021  | -1.048774 |
| 9                | 5                | 0              | -1.411700               | 1.758001  | -0.048082 |
| 10               | 6                | 0              | -0.928572               | 0.736092  | -1.359878 |
| 11               | 1                | 0              | 1.428158                | 0.864062  | 2.056751  |
| 12               | 1                | 0              | 0.939213                | -1.117524 | -0.453712 |
| 13               | 1                | 0              | 2.426610                | 2.188364  | -0.289448 |
| 14               | 1                | 0              | -1.274385               | 0.674098  | 2.373356  |
| 15               | 1                | 0              | 0.158385                | 3.134822  | 1.451109  |
| 16               | 1                | 0              | 1.147003                | 0.455302  | -2.635871 |
| 17               | 1                | 0              | -0.840003               | -1.536043 | -0.302546 |
| 18               | 1                | 0              | -0.155491               | 3.102726  | -1.792103 |
| 19               | 1                | 0              | -2.470635               | 2.296068  | -0.064106 |
| 20               | 1                | 0              | -1.511250               | 0.766981  | -2.278784 |
| 21               | 6                | 0              | -3.022863               | -0.558934 | 0.000671  |
| 22               | 7                | 0              | -3.851046               | -1.064070 | -0.937596 |
| 23               | 1                | 0              | -3.570424               | -1.236495 | -1.894886 |
| 24               | 6                | 0              | -5.119478               | -1.277790 | -0.427819 |
| 25               | 1                | 0              | -5.926887               | -1.674588 | -1.022635 |
| 26               | 7                | 0              | -3.781916               | -0.463848 | 1.108505  |
| 27               | 1                | 0              | -3.412511               | -0.082163 | 1.973640  |
| 28               | 6                | 0              | -5.073516               | -0.892071 | 0.878125  |
| 29               | 1                | 0              | -5.835246               | -0.886350 | 1.641639  |
| 30               | 6                | 0              | 3.076396                | -0.529952 | 0.021469  |

|    |   |   |           |           |           |
|----|---|---|-----------|-----------|-----------|
| 31 | 7 | 0 | 4.149372  | 0.226780  | 0.333666  |
| 32 | 1 | 0 | 4.076758  | 1.224035  | 0.493884  |
| 33 | 6 | 0 | 5.319283  | -0.512785 | 0.321834  |
| 34 | 1 | 0 | 6.282459  | -0.080066 | 0.540776  |
| 35 | 7 | 0 | 3.589406  | -1.763552 | -0.180751 |
| 36 | 1 | 0 | 3.016193  | -2.558574 | -0.429468 |
| 37 | 6 | 0 | 4.963551  | -1.782955 | -0.006919 |
| 38 | 1 | 0 | 5.554036  | -2.676773 | -0.129662 |
| 39 | 1 | 0 | -0.739452 | -1.149746 | 0.414980  |

19a

Standard orientation:

| Center<br>Number | Atomic<br>Number | Atomic<br>Type | Coordinates (Angstroms) |           |           |
|------------------|------------------|----------------|-------------------------|-----------|-----------|
|                  |                  |                | X                       | Y         | Z         |
| 1                | 6                | 0              | -0.803104               | 1.152395  | -1.304414 |
| 2                | 5                | 0              | -1.128557               | -0.051663 | -0.217590 |
| 3                | 5                | 0              | -1.288416               | 1.709700  | 0.177186  |
| 4                | 5                | 0              | 0.822151                | 1.215811  | -1.386255 |
| 5                | 5                | 0              | -0.148148               | 2.631772  | -0.839083 |
| 6                | 5                | 0              | -0.272274               | 0.803956  | 1.312999  |
| 7                | 5                | 0              | 1.493756                | 0.592662  | 0.062633  |
| 8                | 5                | 0              | 0.020891                | 2.578745  | 0.981142  |
| 9                | 5                | 0              | 1.434295                | 2.391978  | -0.136917 |
| 10               | 6                | 0              | 1.209487                | 1.510133  | 1.263363  |
| 11               | 1                | 0              | -1.430672               | 1.278693  | -2.183456 |
| 12               | 1                | 0              | -0.437043               | -1.026142 | -0.330263 |
| 13               | 1                | 0              | -2.408985               | 2.049467  | 0.387631  |
| 14               | 1                | 0              | 1.361923                | 1.148729  | -2.453919 |
| 15               | 1                | 0              | -0.464238               | 3.601840  | -1.441705 |
| 16               | 1                | 0              | -0.553423               | 0.314035  | 2.360288  |
| 17               | 1                | 0              | -0.169977               | 3.479343  | 1.725758  |
| 18               | 1                | 0              | 2.378868                | 3.104555  | -0.219756 |
| 19               | 1                | 0              | 1.808883                | 1.600765  | 2.163841  |
| 20               | 6                | 0              | 2.626188                | -0.478561 | 0.059752  |
| 21               | 7                | 0              | 3.250907                | -0.929292 | -1.048707 |
| 22               | 1                | 0              | 3.015915                | -0.579070 | -1.971544 |
| 23               | 6                | 0              | 4.213214                | -1.868254 | -0.741938 |
| 24               | 1                | 0              | 4.830895                | -2.337494 | -1.491278 |
| 25               | 7                | 0              | 3.199475                | -1.163637 | 1.075051  |
| 26               | 1                | 0              | 2.942065                | -1.038400 | 2.045938  |
| 27               | 6                | 0              | 4.175636                | -2.025532 | 0.611777  |
| 28               | 1                | 0              | 4.748514                | -2.662656 | 1.266918  |
| 29               | 6                | 0              | -2.622595               | -0.644678 | -0.053253 |
| 30               | 7                | 0              | -3.836138               | -0.075657 | 0.106583  |
| 31               | 1                | 0              | -3.954435               | 0.925592  | 0.200112  |
| 32               | 6                | 0              | -4.845580               | -1.019182 | 0.150309  |
| 33               | 1                | 0              | -5.883934               | -0.754915 | 0.273721  |
| 34               | 7                | 0              | -2.888767               | -1.968391 | -0.110274 |
| 35               | 1                | 0              | -2.160354               | -2.657550 | -0.243913 |
| 36               | 6                | 0              | -4.240507               | -2.230313 | 0.012875  |
| 37               | 1                | 0              | -4.647261               | -3.228815 | -0.008341 |

-----  
TS19a/20a

Standard orientation:

| Center<br>Number | Atomic<br>Number | Atomic<br>Type | Coordinates (Angstroms) |           |           |
|------------------|------------------|----------------|-------------------------|-----------|-----------|
|                  |                  |                | X                       | Y         | Z         |
| 1                | 6                | 0              | 0.567951                | 1.632063  | 1.408446  |
| 2                | 5                | 0              | 0.462282                | 0.273302  | 0.552945  |
| 3                | 5                | 0              | 1.121593                | 1.931700  | -0.064644 |
| 4                | 5                | 0              | -1.021448               | 1.445158  | 1.373486  |
| 5                | 5                | 0              | -0.194217               | 2.920096  | 0.743469  |
| 6                | 5                | 0              | 0.145299                | 0.838500  | -1.165195 |
| 7                | 5                | 0              | -1.362522               | 0.535563  | -0.117026 |
| 8                | 5                | 0              | -0.188463               | 2.651065  | -1.050740 |
| 9                | 5                | 0              | -1.709320               | 2.346408  | -0.020217 |
| 10               | 6                | 0              | -1.298971               | 1.524483  | -1.349912 |
| 11               | 1                | 0              | 1.148102                | 1.737452  | 2.316274  |
| 12               | 1                | 0              | 0.408725                | -0.801522 | 1.064872  |
| 13               | 1                | 0              | 2.250547                | 2.232871  | -0.256459 |
| 14               | 1                | 0              | -1.630890               | 1.294630  | 2.386982  |
| 15               | 1                | 0              | -0.078483               | 3.983967  | 1.248669  |
| 16               | 1                | 0              | 0.583843                | 0.217048  | -2.075824 |
| 17               | 1                | 0              | 0.026260                | 3.483512  | -1.864580 |
| 18               | 1                | 0              | -2.756943               | 2.900136  | 0.022166  |
| 19               | 1                | 0              | -1.882190               | 1.483251  | -2.260955 |
| 20               | 6                | 0              | -2.363885               | -0.677997 | -0.103668 |
| 21               | 7                | 0              | -3.094453               | -1.083843 | 0.952239  |
| 22               | 1                | 0              | -3.058226               | -0.614201 | 1.850363  |
| 23               | 6                | 0              | -3.874372               | -2.179662 | 0.635754  |
| 24               | 1                | 0              | -4.537046               | -2.647340 | 1.346647  |
| 25               | 7                | 0              | -2.685155               | -1.535016 | -1.094367 |
| 26               | 1                | 0              | -2.282627               | -1.491627 | -2.022648 |
| 27               | 6                | 0              | -3.610008               | -2.471479 | -0.667867 |
| 28               | 1                | 0              | -3.993047               | -3.245902 | -1.313501 |
| 29               | 6                | 0              | 2.631644                | -0.519080 | 0.097929  |
| 30               | 7                | 0              | 3.749324                | -0.204751 | -0.605310 |
| 31               | 1                | 0              | 3.829004                | 0.648393  | -1.141087 |
| 32               | 6                | 0              | 4.754662                | -1.157645 | -0.489942 |
| 33               | 1                | 0              | 5.712126                | -1.067577 | -0.979157 |
| 34               | 7                | 0              | 2.971253                | -1.707939 | 0.655643  |
| 35               | 1                | 0              | 2.344161                | -2.216963 | 1.263183  |
| 36               | 6                | 0              | 4.255124                | -2.124200 | 0.321862  |
| 37               | 1                | 0              | 4.691023                | -3.043154 | 0.681629  |

-----  
20a

Standard orientation:

| Center<br>Number | Atomic<br>Number | Atomic<br>Type | Coordinates (Angstroms) |           |          |
|------------------|------------------|----------------|-------------------------|-----------|----------|
|                  |                  |                | X                       | Y         | Z        |
| 1                | 6                | 0              | -2.307662               | -1.341420 | 0.577434 |
| 2                | 5                | 0              | -1.074543               | -0.604241 | 1.277883 |

|    |   |   |           |           |           |
|----|---|---|-----------|-----------|-----------|
| 3  | 5 | 0 | -2.728395 | 0.159305  | 0.948733  |
| 4  | 5 | 0 | -1.073080 | -1.327450 | -0.438936 |
| 5  | 5 | 0 | -2.727176 | -0.570202 | -0.763768 |
| 6  | 5 | 0 | -1.224182 | 1.175113  | 0.936232  |
| 7  | 5 | 0 | -0.073081 | 0.117970  | -0.049869 |
| 8  | 5 | 0 | -2.399277 | 1.200437  | -0.501940 |
| 9  | 5 | 0 | -1.230403 | 0.146677  | -1.491975 |
| 10 | 6 | 0 | -0.817357 | 1.419980  | -0.601385 |
| 11 | 1 | 0 | -2.788490 | -2.233831 | 0.955042  |
| 12 | 1 | 0 | -0.590964 | -1.023215 | 2.274167  |
| 13 | 1 | 0 | -3.625415 | 0.368041  | 1.690210  |
| 14 | 1 | 0 | -0.596196 | -2.343511 | -0.827942 |
| 15 | 1 | 0 | -3.623735 | -0.961041 | -1.428082 |
| 16 | 1 | 0 | -0.976861 | 1.995728  | 1.753671  |
| 17 | 1 | 0 | -3.133013 | 2.054105  | -0.862738 |
| 18 | 1 | 0 | -0.986400 | 0.126674  | -2.649656 |
| 19 | 1 | 0 | -0.344843 | 2.312115  | -0.992371 |
| 20 | 6 | 0 | 1.500752  | 0.030768  | -0.017311 |
| 21 | 7 | 0 | 2.247905  | -1.065174 | -0.251605 |
| 22 | 1 | 0 | 1.849031  | -1.964469 | -0.497580 |
| 23 | 6 | 0 | 3.595735  | -0.791970 | -0.123671 |
| 24 | 1 | 0 | 4.357676  | -1.539871 | -0.277631 |
| 25 | 7 | 0 | 2.391611  | 1.002842  | 0.264437  |
| 26 | 1 | 0 | 2.132112  | 1.951337  | 0.508656  |
| 27 | 6 | 0 | 3.687877  | 0.525490  | 0.210352  |
| 28 | 1 | 0 | 4.545092  | 1.149133  | 0.410131  |

o-2a

Standard orientation:

| Center<br>Number | Atomic<br>Number | Atomic<br>Type | Coordinates (Angstroms) |           |           |
|------------------|------------------|----------------|-------------------------|-----------|-----------|
|                  |                  |                | X                       | Y         | Z         |
| 1                | 6                | 0              | 0.500743                | 1.130375  | 0.767708  |
| 2                | 5                | 0              | -0.149967               | -0.162335 | 1.559138  |
| 3                | 5                | 0              | 1.612765                | -0.016243 | 1.389171  |
| 4                | 5                | 0              | 2.023619                | 0.967203  | 0.000000  |
| 5                | 5                | 0              | 1.089635                | -1.601412 | 0.921129  |
| 6                | 5                | 0              | -0.149967               | -0.162335 | -1.559138 |
| 7                | 5                | 0              | 2.377887                | -0.790976 | 0.000000  |
| 8                | 5                | 0              | 1.612765                | -0.016243 | -1.389171 |
| 9                | 1                | 0              | 0.438959                | 2.112934  | 1.227193  |
| 10               | 1                | 0              | -1.090824               | -0.609300 | 0.970623  |
| 11               | 1                | 0              | 2.181043                | 0.191044  | 2.414934  |
| 12               | 1                | 0              | 0.438959                | 2.112934  | -1.227193 |
| 13               | 1                | 0              | 2.804761                | 1.855345  | 0.000000  |
| 14               | 1                | 0              | 1.255096                | -2.578273 | 1.575365  |
| 15               | 1                | 0              | -1.090824               | -0.609300 | -0.970623 |
| 16               | 1                | 0              | 3.513723                | -1.132858 | 0.000000  |
| 17               | 1                | 0              | 2.181043                | 0.191044  | -2.414934 |
| 18               | 1                | 0              | 1.255096                | -2.578273 | -1.575365 |
| 19               | 6                | 0              | -0.539870               | -0.002958 | -3.094121 |
| 20               | 7                | 0              | 0.181647                | 0.392944  | -4.163776 |

|    |   |   |           |           |           |
|----|---|---|-----------|-----------|-----------|
| 21 | 1 | 0 | 1.164752  | 0.626423  | -4.096900 |
| 22 | 6 | 0 | -0.569536 | 0.368622  | -5.325477 |
| 23 | 1 | 0 | -0.164540 | 0.647164  | -6.285367 |
| 24 | 7 | 0 | -1.762437 | -0.272683 | -3.601560 |
| 25 | 1 | 0 | -2.528146 | -0.600179 | -3.027296 |
| 26 | 6 | 0 | -1.810976 | -0.056208 | -4.967445 |
| 27 | 1 | 0 | -2.701613 | -0.220084 | -5.552862 |
| 28 | 6 | 0 | -0.539870 | -0.002958 | 3.094121  |
| 29 | 7 | 0 | -1.762437 | -0.272683 | 3.601560  |
| 30 | 1 | 0 | -2.528146 | -0.600179 | 3.027296  |
| 31 | 6 | 0 | -1.810976 | -0.056208 | 4.967445  |
| 32 | 1 | 0 | -2.701613 | -0.220084 | 5.552862  |
| 33 | 7 | 0 | 0.181647  | 0.392944  | 4.163776  |
| 34 | 1 | 0 | 1.164752  | 0.626423  | 4.096900  |
| 35 | 6 | 0 | -0.569536 | 0.368622  | 5.325477  |
| 36 | 1 | 0 | -0.164540 | 0.647164  | 6.285367  |
| 37 | 6 | 0 | 0.500743  | 1.130375  | -0.767708 |
| 38 | 5 | 0 | 1.089635  | -1.601412 | -0.921129 |
| 39 | 1 | 0 | 0.206911  | -1.904815 | 0.000000  |

-----  
TSo-2a/21a

Standard orientation:

| Center<br>Number | Atomic<br>Number | Atomic<br>Type | Coordinates (Angstroms) |           |           |
|------------------|------------------|----------------|-------------------------|-----------|-----------|
|                  |                  |                | X                       | Y         | Z         |
| 1                | 6                | 0              | -0.694745               | 0.536680  | -1.190636 |
| 2                | 5                | 0              | -1.600292               | -0.152653 | 0.224103  |
| 3                | 5                | 0              | -1.357282               | 1.573844  | 0.073082  |
| 4                | 5                | 0              | 0.076240                | 2.144951  | -0.888861 |
| 5                | 5                | 0              | -0.716894               | 0.906656  | 1.620817  |
| 6                | 5                | 0              | 1.537337                | -0.130187 | 0.084955  |
| 7                | 5                | 0              | 0.041020                | 2.337936  | 0.827827  |
| 8                | 5                | 0              | 1.462773                | 1.678331  | 0.083747  |
| 9                | 1                | 0              | -1.204297               | 0.558225  | -2.150738 |
| 10               | 1                | 0              | -0.897509               | -0.652055 | -0.828928 |
| 11               | 1                | 0              | -2.372475               | 2.149997  | -0.180487 |
| 12               | 1                | 0              | 1.277062                | 0.618696  | -2.192703 |
| 13               | 1                | 0              | -0.074336               | 2.918737  | -1.771031 |
| 14               | 1                | 0              | -1.444022               | 0.888547  | 2.564806  |
| 15               | 1                | 0              | 0.922959                | -1.147218 | 0.294696  |
| 16               | 1                | 0              | -0.082690               | 3.436753  | 1.264501  |
| 17               | 1                | 0              | 2.480355                | 2.235375  | -0.193680 |
| 18               | 1                | 0              | 1.665624                | 1.070472  | 2.511929  |
| 19               | 6                | 0              | 3.078179                | -0.541357 | -0.029806 |
| 20               | 7                | 0              | 4.197237                | 0.200726  | -0.165945 |
| 21               | 1                | 0              | 4.167979                | 1.211797  | -0.213603 |
| 22               | 6                | 0              | 5.337983                | -0.582340 | -0.155900 |
| 23               | 1                | 0              | 6.328931                | -0.167145 | -0.248463 |
| 24               | 7                | 0              | 3.535203                | -1.809943 | 0.060085  |
| 25               | 1                | 0              | 2.915618                | -2.598149 | 0.191647  |
| 26               | 6                | 0              | 4.916534                | -1.866938 | -0.010559 |
| 27               | 1                | 0              | 5.466696                | -2.792398 | 0.048801  |

|    |   |   |           |           |           |
|----|---|---|-----------|-----------|-----------|
| 28 | 6 | 0 | -3.127345 | -0.540174 | 0.034439  |
| 29 | 7 | 0 | -4.177086 | 0.230553  | -0.308132 |
| 30 | 1 | 0 | -4.073853 | 1.223781  | -0.488636 |
| 31 | 6 | 0 | -5.357377 | -0.483386 | -0.292233 |
| 32 | 1 | 0 | -6.310149 | -0.038633 | -0.532731 |
| 33 | 7 | 0 | -3.662069 | -1.758873 | 0.263987  |
| 34 | 1 | 0 | -3.112226 | -2.554846 | 0.563311  |
| 35 | 6 | 0 | -5.029946 | -1.754548 | 0.075224  |
| 36 | 1 | 0 | -5.641074 | -2.631790 | 0.217638  |
| 37 | 6 | 0 | 0.826547  | 0.659366  | -1.205439 |
| 38 | 5 | 0 | 0.961229  | 0.952477  | 1.554867  |
| 39 | 1 | 0 | -0.985237 | -0.887968 | 0.940467  |

21a

Standard orientation:

| Center<br>Number | Atomic<br>Number | Atomic<br>Type | Coordinates (Angstroms) |           |           |
|------------------|------------------|----------------|-------------------------|-----------|-----------|
|                  |                  |                | X                       | Y         | Z         |
| 1                | 6                | 0              | -0.687842               | 0.503443  | -1.208730 |
| 2                | 5                | 0              | -1.609651               | -0.176549 | 0.285969  |
| 3                | 5                | 0              | -1.357813               | 1.551403  | 0.094024  |
| 4                | 5                | 0              | 0.086580                | 2.119616  | -0.874702 |
| 5                | 5                | 0              | -0.742400               | 0.927403  | 1.638875  |
| 6                | 5                | 0              | 1.551966                | -0.130141 | 0.082403  |
| 7                | 5                | 0              | 0.017971                | 2.338202  | 0.836445  |
| 8                | 5                | 0              | 1.462268                | 1.664888  | 0.125306  |
| 9                | 1                | 0              | -1.189597               | 0.607904  | -2.168581 |
| 10               | 1                | 0              | -0.871652               | -0.616412 | -0.925877 |
| 11               | 1                | 0              | -2.371586               | 2.120543  | -0.182101 |
| 12               | 1                | 0              | 1.317240                | 0.642394  | -2.177639 |
| 13               | 1                | 0              | -0.073397               | 2.881087  | -1.766181 |
| 14               | 1                | 0              | -1.479823               | 0.932287  | 2.577809  |
| 15               | 1                | 0              | 0.942979                | -1.129290 | 0.359570  |
| 16               | 1                | 0              | -0.090390               | 3.455933  | 1.228276  |
| 17               | 1                | 0              | 2.479114                | 2.231488  | -0.136788 |
| 18               | 1                | 0              | 1.636923                | 1.039191  | 2.542872  |
| 19               | 6                | 0              | 3.092961                | -0.536541 | -0.031292 |
| 20               | 7                | 0              | 4.201527                | 0.201453  | -0.250715 |
| 21               | 1                | 0              | 4.163925                | 1.207366  | -0.360826 |
| 22               | 6                | 0              | 5.348472                | -0.572056 | -0.218586 |
| 23               | 1                | 0              | 6.333147                | -0.158173 | -0.367076 |
| 24               | 7                | 0              | 3.562395                | -1.792802 | 0.133310  |
| 25               | 1                | 0              | 2.953299                | -2.574205 | 0.335895  |
| 26               | 6                | 0              | 4.941560                | -1.845964 | 0.027606  |
| 27               | 1                | 0              | 5.500660                | -2.761573 | 0.136014  |
| 28               | 6                | 0              | -3.139062               | -0.539452 | 0.046215  |
| 29               | 7                | 0              | -4.178120               | 0.240776  | -0.309374 |
| 30               | 1                | 0              | -4.064895               | 1.234657  | -0.480465 |
| 31               | 6                | 0              | -5.361560               | -0.466072 | -0.324569 |
| 32               | 1                | 0              | -6.306927               | -0.013713 | -0.579812 |
| 33               | 7                | 0              | -3.686126               | -1.757496 | 0.252260  |
| 34               | 1                | 0              | -3.146134               | -2.558051 | 0.557587  |

|    |   |   |           |           |           |
|----|---|---|-----------|-----------|-----------|
| 35 | 6 | 0 | -5.048892 | -1.743464 | 0.036769  |
| 36 | 1 | 0 | -5.668280 | -2.618097 | 0.158210  |
| 37 | 6 | 0 | 0.851206  | 0.655511  | -1.196491 |
| 38 | 5 | 0 | 0.927014  | 0.940689  | 1.587698  |
| 39 | 1 | 0 | -1.023065 | -1.076841 | 0.805136  |

-----  
TS21a/22a

Standard orientation:

| Center<br>Number | Atomic<br>Number | Atomic<br>Type | Coordinates (Angstroms) |           |           |
|------------------|------------------|----------------|-------------------------|-----------|-----------|
|                  |                  |                | X                       | Y         | Z         |
| 1                | 6                | 0              | -0.653409               | 0.529947  | -1.272906 |
| 2                | 5                | 0              | -1.615287               | -0.208694 | 0.298263  |
| 3                | 5                | 0              | -1.355563               | 1.536415  | 0.054640  |
| 4                | 5                | 0              | 0.109002                | 2.121980  | -0.860965 |
| 5                | 5                | 0              | -0.801948               | 0.900628  | 1.602259  |
| 6                | 5                | 0              | 1.565896                | -0.128107 | 0.064853  |
| 7                | 5                | 0              | -0.016846               | 2.313013  | 0.855044  |
| 8                | 5                | 0              | 1.459580                | 1.651839  | 0.174428  |
| 9                | 1                | 0              | -1.125325               | 0.706436  | -2.238298 |
| 10               | 1                | 0              | -0.840565               | -0.571029 | -1.058418 |
| 11               | 1                | 0              | -2.365188               | 2.104780  | -0.239893 |
| 12               | 1                | 0              | 1.399930                | 0.713448  | -2.165347 |
| 13               | 1                | 0              | -0.025603               | 2.906867  | -1.736258 |
| 14               | 1                | 0              | -1.567417               | 0.933174  | 2.521606  |
| 15               | 1                | 0              | 0.947098                | -1.111088 | 0.365344  |
| 16               | 1                | 0              | -0.117721               | 3.428618  | 1.254998  |
| 17               | 1                | 0              | 2.480279                | 2.233827  | -0.034626 |
| 18               | 1                | 0              | 1.559309                | 0.949465  | 2.575771  |
| 19               | 6                | 0              | 3.106699                | -0.532743 | -0.026874 |
| 20               | 7                | 0              | 4.211536                | 0.206647  | -0.260080 |
| 21               | 1                | 0              | 4.169599                | 1.210549  | -0.386080 |
| 22               | 6                | 0              | 5.362382                | -0.560284 | -0.210777 |
| 23               | 1                | 0              | 6.345234                | -0.144494 | -0.365852 |
| 24               | 7                | 0              | 3.581907                | -1.782947 | 0.163733  |
| 25               | 1                | 0              | 2.976870                | -2.563994 | 0.379679  |
| 26               | 6                | 0              | 4.961525                | -1.830986 | 0.060698  |
| 27               | 1                | 0              | 5.525123                | -2.741318 | 0.188530  |
| 28               | 6                | 0              | -3.149631               | -0.545858 | 0.048440  |
| 29               | 7                | 0              | -4.196232               | 0.261343  | -0.213531 |
| 30               | 1                | 0              | -4.082073               | 1.264663  | -0.316163 |
| 31               | 6                | 0              | -5.379894               | -0.441346 | -0.260334 |
| 32               | 1                | 0              | -6.330372               | 0.030278  | -0.454600 |
| 33               | 7                | 0              | -3.694404               | -1.777651 | 0.162937  |
| 34               | 1                | 0              | -3.147853               | -2.600338 | 0.387196  |
| 35               | 6                | 0              | -5.060894               | -1.745741 | -0.016990 |
| 36               | 1                | 0              | -5.679216               | -2.627481 | 0.043374  |
| 37               | 6                | 0              | 0.899049                | 0.682490  | -1.201601 |
| 38               | 5                | 0              | 0.868920                | 0.890319  | 1.603582  |
| 39               | 1                | 0              | -1.025498               | -1.193944 | 0.629168  |

-----  
22a

Standard orientation:

| Center<br>Number | Atomic<br>Number | Atomic<br>Type | Coordinates (Angstroms) |           |           |
|------------------|------------------|----------------|-------------------------|-----------|-----------|
|                  |                  |                | X                       | Y         | Z         |
| 1                | 6                | 0              | -0.018201               | 1.649668  | -1.504570 |
| 2                | 5                | 0              | -1.772885               | -0.363661 | -0.209669 |
| 3                | 5                | 0              | -1.210230               | 1.730862  | -0.099211 |
| 4                | 5                | 0              | 0.355428                | 2.563311  | -0.127313 |
| 5                | 5                | 0              | -1.137085               | 0.371116  | 1.095056  |
| 6                | 5                | 0              | 1.778131                | 0.181118  | -0.116722 |
| 7                | 5                | 0              | -0.137189               | 1.760518  | 1.335976  |
| 8                | 5                | 0              | 1.546851                | 1.621766  | 0.791524  |
| 9                | 1                | 0              | -0.126532               | 2.398199  | -2.286815 |
| 10               | 1                | 0              | -0.386705               | 0.695082  | -1.848870 |
| 11               | 1                | 0              | -2.133727               | 2.454808  | -0.294658 |
| 12               | 1                | 0              | 2.210698                | 1.991252  | -1.511242 |
| 13               | 1                | 0              | 0.444746                | 3.723654  | -0.339472 |
| 14               | 1                | 0              | -1.916209               | 0.417499  | 2.013722  |
| 15               | 1                | 0              | 0.806924                | -0.604383 | 0.065443  |
| 16               | 1                | 0              | -0.325168               | 2.383729  | 2.328793  |
| 17               | 1                | 0              | 2.466625                | 2.175420  | 1.296189  |
| 18               | 1                | 0              | 1.017722                | -0.549094 | 2.213607  |
| 19               | 6                | 0              | 3.164668                | -0.540484 | -0.086982 |
| 20               | 7                | 0              | 4.174557                | -0.469608 | -0.981418 |
| 21               | 1                | 0              | 4.128015                | 0.080792  | -1.828589 |
| 22               | 6                | 0              | 5.253214                | -1.247218 | -0.589317 |
| 23               | 1                | 0              | 6.159285                | -1.317780 | -1.169589 |
| 24               | 7                | 0              | 3.615180                | -1.383166 | 0.867066  |
| 25               | 1                | 0              | 3.078106                | -1.595700 | 1.699536  |
| 26               | 6                | 0              | 4.894944                | -1.829112 | 0.585874  |
| 27               | 1                | 0              | 5.428815                | -2.507089 | 1.232551  |
| 28               | 6                | 0              | -3.317844               | -0.667886 | -0.157748 |
| 29               | 7                | 0              | -4.212891               | -0.270984 | 0.772476  |
| 30               | 1                | 0              | -3.927346               | 0.280320  | 1.574706  |
| 31               | 6                | 0              | -5.479193               | -0.736380 | 0.494218  |
| 32               | 1                | 0              | -6.330422               | -0.524191 | 1.121628  |
| 33               | 7                | 0              | -4.050398               | -1.395963 | -1.034055 |
| 34               | 1                | 0              | -3.648105               | -1.830139 | -1.854601 |
| 35               | 6                | 0              | -5.378068               | -1.457063 | -0.659543 |
| 36               | 1                | 0              | -6.122290               | -1.992029 | -1.227848 |
| 37               | 6                | 0              | 1.437645                | 1.468048  | -0.954280 |
| 38               | 5                | 0              | 0.657341                | 0.132867  | 1.300263  |
| 39               | 1                | 0              | -1.254379               | -0.869224 | -1.168401 |

TS22a/23a

Standard orientation:

| Center<br>Number | Atomic<br>Number | Atomic<br>Type | Coordinates (Angstroms) |           |           |
|------------------|------------------|----------------|-------------------------|-----------|-----------|
|                  |                  |                | X                       | Y         | Z         |
| 1                | 6                | 0              | -0.455807               | 1.476188  | -1.558471 |
| 2                | 5                | 0              | -1.714930               | -0.452323 | -0.155421 |



|    |   |   |           |           |           |
|----|---|---|-----------|-----------|-----------|
| 3  | 5 | 0 | -1.308754 | 1.572759  | -0.187301 |
| 4  | 5 | 0 | 0.313219  | 2.477358  | -0.365184 |
| 5  | 5 | 0 | -1.083381 | 0.339270  | 1.141587  |
| 6  | 5 | 0 | 1.856874  | 0.306107  | -0.076250 |
| 7  | 5 | 0 | -0.191033 | 1.809943  | 1.228647  |
| 8  | 5 | 0 | 1.526832  | 1.794771  | 0.762039  |
| 9  | 1 | 0 | -0.682723 | 2.168323  | -2.369745 |
| 10 | 1 | 0 | -0.142506 | 0.518351  | -1.936627 |
| 11 | 1 | 0 | -2.224366 | 2.341523  | -0.204276 |
| 12 | 1 | 0 | 2.208285  | 2.039736  | -1.593960 |
| 13 | 1 | 0 | 0.273950  | 3.634235  | -0.622272 |
| 14 | 1 | 0 | -1.816955 | 0.392397  | 2.094382  |
| 15 | 1 | 0 | 0.847525  | -0.464747 | 0.203314  |
| 16 | 1 | 0 | -0.422324 | 2.501415  | 2.165588  |
| 17 | 1 | 0 | 2.305611  | 2.509304  | 1.299866  |
| 18 | 1 | 0 | 1.152360  | -0.338231 | 2.291287  |
| 19 | 6 | 0 | 3.210746  | -0.480495 | -0.071193 |
| 20 | 7 | 0 | 4.184952  | -0.504480 | -1.005834 |
| 21 | 1 | 0 | 4.132359  | 0.005511  | -1.877998 |
| 22 | 6 | 0 | 5.241491  | -1.308666 | -0.612068 |
| 23 | 1 | 0 | 6.119222  | -1.453755 | -1.221504 |
| 24 | 7 | 0 | 3.661004  | -1.287925 | 0.911664  |
| 25 | 1 | 0 | 3.143197  | -1.434631 | 1.770955  |
| 26 | 6 | 0 | 4.906339  | -1.807059 | 0.608741  |
| 27 | 1 | 0 | 5.436420  | -2.471189 | 1.272753  |
| 28 | 6 | 0 | -3.268502 | -0.719204 | -0.120233 |
| 29 | 7 | 0 | -4.174696 | -0.190328 | 0.730257  |
| 30 | 1 | 0 | -3.896015 | 0.446664  | 1.468668  |
| 31 | 6 | 0 | -5.445768 | -0.658077 | 0.477548  |
| 32 | 1 | 0 | -6.306050 | -0.351222 | 1.051090  |
| 33 | 7 | 0 | -3.997825 | -1.532329 | -0.919826 |
| 34 | 1 | 0 | -3.586593 | -2.071261 | -1.670794 |
| 35 | 6 | 0 | -5.335362 | -1.517547 | -0.575828 |
| 36 | 1 | 0 | -6.079133 | -2.102164 | -1.093511 |
| 37 | 6 | 0 | 1.531641  | 1.554069  | -0.896622 |
| 38 | 5 | 0 | 0.738017  | 0.266736  | 1.346241  |
| 39 | 1 | 0 | -1.169188 | -1.073181 | -1.024079 |

23a

Standard orientation:

| Center<br>Number | Atomic<br>Number | Atomic<br>Type | Coordinates (Angstroms) |           |           |
|------------------|------------------|----------------|-------------------------|-----------|-----------|
|                  |                  |                | X                       | Y         | Z         |
| 1                | 6                | 0              | -1.308070               | 0.623829  | -1.518461 |
| 2                | 5                | 0              | -1.884333               | -0.203320 | -0.355354 |
| 3                | 5                | 0              | -1.325536               | 1.469556  | -0.079820 |
| 4                | 5                | 0              | 0.369037                | 2.362857  | -0.283630 |
| 5                | 5                | 0              | -1.046433               | 0.091744  | 1.145146  |
| 6                | 5                | 0              | 2.025772                | 0.369305  | -0.052378 |
| 7                | 5                | 0              | -0.110751               | 1.587821  | 1.231697  |
| 8                | 5                | 0              | 1.596093                | 1.736481  | 0.960198  |
| 9                | 1                | 0              | -1.985161               | 1.000524  | -2.282670 |

|    |   |   |           |           |           |
|----|---|---|-----------|-----------|-----------|
| 10 | 1 | 0 | -0.333951 | 0.371104  | -1.920293 |
| 11 | 1 | 0 | -2.254970 | 2.208550  | 0.101178  |
| 12 | 1 | 0 | 2.390994  | 2.219112  | -1.321322 |
| 13 | 1 | 0 | 0.137584  | 3.505009  | -0.524118 |
| 14 | 1 | 0 | -1.611042 | -0.305029 | 2.113200  |
| 15 | 1 | 0 | 1.028453  | -0.507263 | 0.181343  |
| 16 | 1 | 0 | -0.544901 | 2.067257  | 2.233662  |
| 17 | 1 | 0 | 2.329471  | 2.322461  | 1.687588  |
| 18 | 1 | 0 | 1.252101  | -0.555148 | 2.243614  |
| 19 | 6 | 0 | 3.404242  | -0.382772 | -0.111687 |
| 20 | 7 | 0 | 4.343918  | -0.291677 | -1.074361 |
| 21 | 1 | 0 | 4.227670  | 0.280371  | -1.901801 |
| 22 | 6 | 0 | 5.452599  | -1.060209 | -0.772203 |
| 23 | 1 | 0 | 6.315889  | -1.115556 | -1.416168 |
| 24 | 7 | 0 | 3.928532  | -1.228306 | 0.798795  |
| 25 | 1 | 0 | 3.453432  | -1.455809 | 1.664746  |
| 26 | 6 | 0 | 5.186560  | -1.658545 | 0.422283  |
| 27 | 1 | 0 | 5.774431  | -2.335367 | 1.021786  |
| 28 | 6 | 0 | -3.411524 | -0.570807 | -0.192446 |
| 29 | 7 | 0 | -4.407258 | 0.316556  | -0.008757 |
| 30 | 1 | 0 | -4.223909 | 1.308512  | 0.100648  |
| 31 | 6 | 0 | -5.639411 | -0.310910 | 0.057372  |
| 32 | 1 | 0 | -6.560272 | 0.231442  | 0.201235  |
| 33 | 7 | 0 | -4.025545 | -1.770543 | -0.243245 |
| 34 | 1 | 0 | -3.536138 | -2.643144 | -0.391331 |
| 35 | 6 | 0 | -5.398564 | -1.640507 | -0.088571 |
| 36 | 1 | 0 | -6.065813 | -2.487470 | -0.096277 |
| 37 | 6 | 0 | 1.656973  | 1.655082  | -0.747248 |
| 38 | 5 | 0 | 0.919985  | 0.140372  | 1.332456  |
| 39 | 1 | 0 | -1.047401 | -0.996792 | 0.212149  |

-----  
TSm-2a/24a

Standard orientation:

| Center<br>Number | Atomic<br>Number | Atomic<br>Type | Coordinates (Angstroms) |           |           |
|------------------|------------------|----------------|-------------------------|-----------|-----------|
|                  |                  |                | X                       | Y         | Z         |
| 1                | 6                | 0              | -0.787669               | 0.739706  | 1.290148  |
| 2                | 5                | 0              | -1.430562               | -0.162957 | 0.005426  |
| 3                | 5                | 0              | -0.048701               | 2.229595  | 0.960351  |
| 4                | 5                | 0              | 0.859642                | 0.753786  | 1.371500  |
| 5                | 5                | 0              | 0.831440                | 0.862563  | -1.413878 |
| 6                | 1                | 0              | -1.327160               | 0.716723  | 2.233806  |
| 7                | 1                | 0              | -2.500901               | 2.132263  | 0.056417  |
| 8                | 1                | 0              | -0.908191               | -1.252045 | -0.003858 |
| 9                | 1                | 0              | -0.182705               | 3.147501  | 1.698413  |
| 10               | 1                | 0              | 1.373304                | 0.758940  | 2.454829  |
| 11               | 1                | 0              | -1.377184               | 0.793711  | -2.194224 |
| 12               | 1                | 0              | -0.259536               | 3.240908  | -1.570353 |
| 13               | 1                | 0              | 0.614219                | -1.786944 | -0.080566 |
| 14               | 1                | 0              | 2.404601                | 2.417927  | -0.007559 |
| 15               | 1                | 0              | 1.316120                | 0.900494  | -2.507136 |
| 16               | 6                | 0              | -3.005873               | -0.550216 | 0.002138  |

|    |   |   |           |           |           |
|----|---|---|-----------|-----------|-----------|
| 17 | 7 | 0 | -3.431287 | -1.832394 | -0.015975 |
| 18 | 7 | 0 | -4.147161 | 0.170396  | 0.015906  |
| 19 | 1 | 0 | -2.787648 | -2.613087 | -0.028452 |
| 20 | 1 | 0 | -4.148826 | 1.182790  | 0.031410  |
| 21 | 6 | 0 | -5.267819 | -0.639555 | 0.007070  |
| 22 | 6 | 0 | -4.810699 | -1.920869 | -0.013454 |
| 23 | 1 | 0 | -6.271086 | -0.243763 | 0.015934  |
| 24 | 1 | 0 | -5.336148 | -2.862515 | -0.026053 |
| 25 | 5 | 0 | -1.418774 | 1.644427  | 0.036201  |
| 26 | 5 | 0 | 1.588360  | 0.099158  | -0.033667 |
| 27 | 5 | 0 | 1.345046  | 1.871313  | -0.007087 |
| 28 | 6 | 0 | -0.806477 | 0.788510  | -1.268352 |
| 29 | 5 | 0 | -0.082964 | 2.286308  | -0.890153 |
| 30 | 6 | 0 | 3.039395  | -0.489290 | -0.022458 |
| 31 | 7 | 0 | 3.854806  | -0.742951 | -1.068787 |
| 32 | 1 | 0 | 3.569541  | -0.579005 | -2.027795 |
| 33 | 6 | 0 | 5.095120  | -1.172767 | -0.648608 |
| 34 | 1 | 0 | 5.891594  | -1.419880 | -1.332748 |
| 35 | 7 | 0 | 3.784968  | -0.773708 | 1.065592  |
| 36 | 1 | 0 | 3.427882  | -0.638552 | 2.005416  |
| 37 | 6 | 0 | 5.050503  | -1.191262 | 0.716602  |
| 38 | 1 | 0 | 5.801115  | -1.457156 | 1.444133  |
| 39 | 1 | 0 | 1.015399  | -1.494220 | -0.660744 |

-----

24a

Standard orientation:

| Center<br>Number | Atomic<br>Number | Atomic<br>Type | Coordinates (Angstroms) |           |           |
|------------------|------------------|----------------|-------------------------|-----------|-----------|
|                  |                  |                | X                       | Y         | Z         |
| 1                | 6                | 0              | 1.107020                | 0.610589  | 1.288840  |
| 2                | 5                | 0              | 0.021125                | 0.964248  | 0.000000  |
| 3                | 5                | 0              | 2.715006                | 0.160316  | 0.914205  |
| 4                | 5                | 0              | 1.463308                | -0.974211 | 1.421028  |
| 5                | 5                | 0              | 1.463308                | -0.974211 | -1.421028 |
| 6                | 1                | 0              | 0.980795                | 1.166607  | 2.214839  |
| 7                | 1                | 0              | 2.073992                | 2.528915  | 0.000000  |
| 8                | 1                | 0              | -0.918596               | 0.203852  | 0.000000  |
| 9                | 1                | 0              | 3.616257                | 0.494171  | 1.606912  |
| 10               | 1                | 0              | 1.519960                | -1.504058 | 2.490113  |
| 11               | 1                | 0              | 0.980795                | 1.166607  | -2.214839 |
| 12               | 1                | 0              | 3.616257                | 0.494171  | -1.606912 |
| 13               | 1                | 0              | 3.184664                | -2.312828 | 0.000000  |
| 14               | 1                | 0              | 1.519960                | -1.504058 | -2.490113 |
| 15               | 6                | 0              | -0.691573               | 2.419898  | 0.000000  |
| 16               | 7                | 0              | -2.034980               | 2.562695  | 0.000000  |
| 17               | 7                | 0              | -0.230465               | 3.688944  | 0.000000  |
| 18               | 1                | 0              | -2.658545               | 1.766265  | 0.000000  |
| 19               | 1                | 0              | 0.758400                | 3.906485  | 0.000000  |
| 20               | 6                | 0              | -1.260942               | 4.611486  | 0.000000  |
| 21               | 6                | 0              | -2.415502               | 3.892213  | 0.000000  |
| 22               | 1                | 0              | -1.087826               | 5.676078  | 0.000000  |
| 23               | 1                | 0              | -3.447401               | 4.205402  | 0.000000  |

|    |   |   |           |           |           |
|----|---|---|-----------|-----------|-----------|
| 24 | 5 | 0 | 1.835671  | 1.365374  | 0.000000  |
| 25 | 5 | 0 | 0.770828  | -1.606217 | 0.000000  |
| 26 | 5 | 0 | 2.509857  | -1.331033 | 0.000000  |
| 27 | 6 | 0 | 1.107020  | 0.610589  | -1.288840 |
| 28 | 5 | 0 | 2.715006  | 0.160316  | -0.914205 |
| 29 | 6 | 0 | -0.433559 | -2.571138 | 0.000000  |
| 30 | 7 | 0 | -1.058140 | -3.115437 | -1.069224 |
| 31 | 1 | 0 | -0.773519 | -2.899847 | -2.019322 |
| 32 | 6 | 0 | -2.046213 | -3.986169 | -0.685296 |
| 33 | 1 | 0 | -2.655184 | -4.531979 | -1.389115 |
| 34 | 7 | 0 | -1.058140 | -3.115437 | 1.069224  |
| 35 | 1 | 0 | -0.773519 | -2.899847 | 2.019322  |
| 36 | 6 | 0 | -2.046213 | -3.986169 | 0.685296  |
| 37 | 1 | 0 | -2.655184 | -4.531979 | 1.389115  |

-----  
TS24a/25a

Standard orientation:

| Center<br>Number | Atomic<br>Number | Atomic<br>Type | Coordinates (Angstroms) |           |           |
|------------------|------------------|----------------|-------------------------|-----------|-----------|
|                  |                  |                | X                       | Y         | Z         |
| 1                | 6                | 0              | -0.606385               | 1.583102  | 1.422000  |
| 2                | 5                | 0              | -0.450685               | 0.273211  | 0.524579  |
| 3                | 5                | 0              | 0.148864                | 2.910466  | 0.810971  |
| 4                | 5                | 0              | 1.004121                | 1.450566  | 1.418415  |
| 5                | 5                | 0              | 1.408611                | 1.580219  | -1.425764 |
| 6                | 1                | 0              | -1.211918               | 1.641389  | 2.316605  |
| 7                | 1                | 0              | -2.231168               | 2.166587  | -0.351266 |
| 8                | 1                | 0              | -0.349228               | -0.849985 | 0.903334  |
| 9                | 1                | 0              | -0.020980               | 3.960639  | 1.328770  |
| 10               | 1                | 0              | 1.582550                | 1.296295  | 2.447172  |
| 11               | 1                | 0              | -0.491876               | 0.353878  | -1.820264 |
| 12               | 1                | 0              | -0.171095               | 3.435719  | -1.816323 |
| 13               | 1                | 0              | 2.704610                | 3.024556  | 0.184479  |
| 14               | 1                | 0              | 1.932793                | 1.448131  | -2.481912 |
| 15               | 6                | 0              | -2.600807               | -0.533870 | -0.001396 |
| 16               | 7                | 0              | -2.861302               | -1.799937 | 0.412100  |
| 17               | 7                | 0              | -3.795434               | -0.158412 | -0.528515 |
| 18               | 1                | 0              | -2.166330               | -2.370926 | 0.873008  |
| 19               | 1                | 0              | -3.950859               | 0.759463  | -0.921844 |
| 20               | 6                | 0              | -4.767151               | -1.148331 | -0.445874 |
| 21               | 6                | 0              | -4.166625               | -2.204471 | 0.159703  |
| 22               | 1                | 0              | -5.773491               | -1.019416 | -0.813116 |
| 23               | 1                | 0              | -4.545706               | -3.178803 | 0.425926  |
| 24               | 5                | 0              | -1.112630               | 1.944473  | -0.046678 |
| 25               | 5                | 0              | 1.436352                | 0.616149  | -0.065970 |
| 26               | 5                | 0              | 1.700771                | 2.407639  | 0.041357  |
| 27               | 6                | 0              | -0.042145               | 0.922296  | -1.012110 |
| 28               | 5                | 0              | 0.196806                | 2.683599  | -0.977732 |
| 29               | 6                | 0              | 2.361587                | -0.653188 | -0.066162 |
| 30               | 7                | 0              | 2.993119                | -1.228302 | -1.110274 |
| 31               | 1                | 0              | 2.917860                | -0.872200 | -2.056160 |
| 32               | 6                | 0              | 3.779295                | -2.287892 | -0.704230 |

|    |   |   |          |           |           |
|----|---|---|----------|-----------|-----------|
| 33 | 1 | 0 | 4.366543 | -2.875436 | -1.392218 |
| 34 | 7 | 0 | 2.758977 | -1.367609 | 1.006556  |
| 35 | 1 | 0 | 2.459023 | -1.145556 | 1.948802  |
| 36 | 6 | 0 | 3.633594 | -2.373918 | 0.648627  |
| 37 | 1 | 0 | 4.072518 | -3.048510 | 1.366695  |

25a

Standard orientation:

| Center<br>Number | Atomic<br>Number | Atomic<br>Type | Coordinates (Angstroms) |           |           |
|------------------|------------------|----------------|-------------------------|-----------|-----------|
|                  |                  |                | X                       | Y         | Z         |
| 1                | 6                | 0              | 2.314485                | -1.443035 | -0.113968 |
| 2                | 5                | 0              | 1.032866                | -1.126237 | 0.768560  |
| 3                | 5                | 0              | 2.758868                | -0.117801 | -0.910325 |
| 4                | 5                | 0              | 1.121648                | -0.939745 | -1.066876 |
| 5                | 5                | 0              | 0.740959                | 1.679797  | 0.139846  |
| 6                | 1                | 0              | 2.802186                | -2.406424 | -0.169050 |
| 7                | 1                | 0              | 3.485244                | -0.413096 | 1.787252  |
| 8                | 1                | 0              | 0.517711                | -1.903246 | 1.498608  |
| 9                | 1                | 0              | 3.689130                | -0.130637 | -1.639273 |
| 10               | 1                | 0              | 0.673080                | -1.641522 | -1.908561 |
| 11               | 1                | 0              | 0.983046                | 0.761914  | 2.256309  |
| 12               | 1                | 0              | 3.133280                | 2.166721  | 0.429621  |
| 13               | 1                | 0              | 1.095120                | 1.355647  | -2.326435 |
| 14               | 1                | 0              | 0.177722                | 2.690189  | 0.394807  |
| 15               | 5                | 0              | 2.691643                | -0.288028 | 0.922547  |
| 16               | 5                | 0              | 0.074050                | 0.129420  | -0.072477 |
| 17               | 5                | 0              | 1.263865                | 0.871505  | -1.257979 |
| 18               | 6                | 0              | 1.194736                | 0.542095  | 1.214101  |
| 19               | 5                | 0              | 2.386952                | 1.295971  | 0.137671  |
| 20               | 6                | 0              | -1.495757               | 0.009338  | -0.014265 |
| 21               | 7                | 0              | -2.388926               | 1.017499  | -0.075173 |
| 22               | 1                | 0              | -2.113403               | 1.991218  | -0.142864 |
| 23               | 6                | 0              | -3.684117               | 0.546725  | -0.042660 |
| 24               | 1                | 0              | -4.542548               | 1.198835  | -0.083172 |
| 25               | 7                | 0              | -2.247321               | -1.108969 | 0.057745  |
| 26               | 1                | 0              | -1.853203               | -2.041128 | 0.110072  |
| 27               | 6                | 0              | -3.594183               | -0.811996 | 0.043048  |
| 28               | 1                | 0              | -4.358865               | -1.571357 | 0.092305  |

TS25a/26a

Standard orientation:

| Center<br>Number | Atomic<br>Number | Atomic<br>Type | Coordinates (Angstroms) |           |           |
|------------------|------------------|----------------|-------------------------|-----------|-----------|
|                  |                  |                | X                       | Y         | Z         |
| 1                | 6                | 0              | -2.414105               | -1.229288 | 0.209813  |
| 2                | 5                | 0              | -0.913707               | -1.313833 | 0.930484  |
| 3                | 5                | 0              | -0.066207               | -0.025877 | 0.114562  |
| 4                | 5                | 0              | -2.475084               | 1.404946  | -0.400656 |
| 5                | 5                | 0              | -2.606045               | -0.181313 | -1.075375 |
| 6                | 5                | 0              | -0.932594               | 1.471385  | 0.447684  |

|    |   |   |           |           |           |
|----|---|---|-----------|-----------|-----------|
| 7  | 5 | 0 | -0.953670 | 0.252766  | 1.609169  |
| 8  | 5 | 0 | -3.062394 | 0.180869  | 0.600004  |
| 9  | 1 | 0 | -0.477749 | -2.337415 | 1.343796  |
| 10 | 1 | 0 | -3.302729 | -0.402328 | -2.003904 |
| 11 | 1 | 0 | -0.441070 | 2.554776  | 0.471583  |
| 12 | 1 | 0 | -1.001255 | 0.484040  | 2.768834  |
| 13 | 1 | 0 | -3.000063 | -2.142582 | 0.252126  |
| 14 | 6 | 0 | -1.116212 | 0.648550  | -1.054655 |
| 15 | 5 | 0 | -1.100413 | -1.113554 | -0.808255 |
| 16 | 1 | 0 | -0.769076 | -1.868229 | -1.656688 |
| 17 | 1 | 0 | -2.922153 | 2.405275  | -0.843195 |
| 18 | 1 | 0 | -0.691803 | 1.026526  | -1.978440 |
| 19 | 1 | 0 | -3.960776 | 0.290192  | 1.360260  |
| 20 | 6 | 0 | 1.506163  | -0.003266 | 0.011433  |
| 21 | 7 | 0 | 2.325160  | -1.059454 | -0.161334 |
| 22 | 1 | 0 | 1.987320  | -2.011418 | -0.251125 |
| 23 | 6 | 0 | 3.648182  | -0.669584 | -0.179894 |
| 24 | 1 | 0 | 4.459716  | -1.368723 | -0.308252 |
| 25 | 7 | 0 | 2.327821  | 1.061073  | 0.104244  |
| 26 | 1 | 0 | 1.991564  | 2.006273  | 0.255335  |
| 27 | 6 | 0 | 3.650034  | 0.684268  | -0.009754 |
| 28 | 1 | 0 | 4.463403  | 1.391244  | 0.039559  |

26a

Standard orientation:

| Center<br>Number | Atomic<br>Number | Atomic<br>Type | Coordinates (Angstroms) |           |           |
|------------------|------------------|----------------|-------------------------|-----------|-----------|
|                  |                  |                | X                       | Y         | Z         |
| 1                | 6                | 0              | 2.324228                | 1.097699  | 0.355091  |
| 2                | 5                | 0              | 0.805555                | 1.624866  | 0.550558  |
| 3                | 5                | 0              | 0.067701                | 0.178150  | 0.105926  |
| 4                | 5                | 0              | 2.323980                | -1.542516 | -0.535114 |
| 5                | 5                | 0              | 2.707952                | 0.051856  | -0.935217 |
| 6                | 5                | 0              | 1.055845                | -1.261353 | 0.568531  |
| 7                | 5                | 0              | 1.246795                | 0.258562  | 1.471933  |
| 8                | 5                | 0              | 2.716085                | -0.567390 | 0.789095  |
| 9                | 1                | 0              | 0.435877                | 2.695036  | 0.889082  |
| 10               | 1                | 0              | 3.492053                | 0.335161  | -1.771850 |
| 11               | 1                | 0              | 0.443752                | -2.206606 | 0.946929  |
| 12               | 1                | 0              | 1.185209                | 0.342215  | 2.650200  |
| 13               | 1                | 0              | 3.096890                | 1.825049  | 0.582511  |
| 14               | 6                | 0              | 1.096259                | -0.620636 | -1.086353 |
| 15               | 5                | 0              | 1.211945                | 1.073826  | -1.001830 |
| 16               | 1                | 0              | 1.125166                | 1.758819  | -1.961121 |
| 17               | 1                | 0              | 2.705469                | -2.555520 | -1.003488 |
| 18               | 1                | 0              | 0.596973                | -0.990808 | -1.976155 |
| 19               | 1                | 0              | 3.620200                | -0.753505 | 1.526965  |
| 20               | 6                | 0              | -1.496959               | 0.029848  | 0.024213  |
| 21               | 7                | 0              | -2.390555               | 1.004240  | -0.240053 |
| 22               | 1                | 0              | -2.125373               | 1.965171  | -0.424857 |
| 23               | 6                | 0              | -3.684024               | 0.523796  | -0.198352 |
| 24               | 1                | 0              | -4.543253               | 1.149411  | -0.382917 |

|    |   |   |           |           |          |
|----|---|---|-----------|-----------|----------|
| 25 | 7 | 0 | -2.241523 | -1.074212 | 0.231216 |
| 26 | 1 | 0 | -1.840416 | -1.972666 | 0.476645 |
| 27 | 6 | 0 | -3.589095 | -0.801883 | 0.105490 |
| 28 | 1 | 0 | -4.349744 | -1.554904 | 0.239965 |

TS26a/20a

Standard orientation:

| Center<br>Number | Atomic<br>Number | Atomic<br>Type | Coordinates (Angstroms) |           |           |
|------------------|------------------|----------------|-------------------------|-----------|-----------|
|                  |                  |                | X                       | Y         | Z         |
| 1                | 6                | 0              | -2.410392               | 1.126567  | -0.469586 |
| 2                | 5                | 0              | -0.872829               | 1.612662  | -0.093625 |
| 3                | 5                | 0              | -0.052261               | 0.101010  | -0.009805 |
| 4                | 5                | 0              | -2.451772               | -1.409856 | 0.478655  |
| 5                | 5                | 0              | -3.089351               | 0.168357  | 0.606315  |
| 6                | 5                | 0              | -1.070111               | -1.239641 | -0.578694 |
| 7                | 5                | 0              | -1.145824               | 0.423675  | -1.358723 |
| 8                | 5                | 0              | -2.629343               | -0.501000 | -0.981728 |
| 9                | 1                | 0              | -0.460209               | 2.702021  | -0.315331 |
| 10               | 1                | 0              | -3.883187               | 0.522988  | 1.407500  |
| 11               | 1                | 0              | -0.528860               | -2.198075 | -1.023947 |
| 12               | 1                | 0              | -0.881878               | 0.669158  | -2.485301 |
| 13               | 1                | 0              | -3.012177               | 1.930907  | -0.886718 |
| 14               | 6                | 0              | -1.015358               | -0.808656 | 1.085624  |
| 15               | 5                | 0              | -0.998050               | 0.746687  | 1.368975  |
| 16               | 1                | 0              | -1.011761               | 1.218034  | 2.454409  |
| 17               | 1                | 0              | -2.880967               | -2.456596 | 0.819682  |
| 18               | 1                | 0              | -0.579107               | -1.470175 | 1.831169  |
| 19               | 1                | 0              | -3.470610               | -0.741576 | -1.779251 |
| 20               | 6                | 0              | 1.520314                | 0.013805  | -0.000123 |
| 21               | 7                | 0              | 2.393684                | 1.027965  | 0.157386  |
| 22               | 1                | 0              | 2.106986                | 1.990494  | 0.298209  |
| 23               | 6                | 0              | 3.697985                | 0.583657  | 0.069259  |
| 24               | 1                | 0              | 4.545220                | 1.244055  | 0.168043  |
| 25               | 7                | 0              | 2.286555                | -1.078859 | -0.185336 |
| 26               | 1                | 0              | 1.903082                | -2.000867 | -0.361759 |
| 27               | 6                | 0              | 3.629723                | -0.759837 | -0.152017 |
| 28               | 1                | 0              | 4.405873                | -1.496807 | -0.286843 |

m-2a

Standard orientation:

| Center<br>Number | Atomic<br>Number | Atomic<br>Type | Coordinates (Angstroms) |           |           |
|------------------|------------------|----------------|-------------------------|-----------|-----------|
|                  |                  |                | X                       | Y         | Z         |
| 1                | 6                | 0              | 0.728234                | 0.972717  | 1.286961  |
| 2                | 5                | 0              | -0.289423               | 1.442177  | 0.000000  |
| 3                | 5                | 0              | 2.213608                | 0.237948  | 0.873803  |
| 4                | 5                | 0              | 0.728234                | -0.629440 | 1.428180  |
| 5                | 5                | 0              | 0.728234                | -0.629440 | -1.428180 |
| 6                | 1                | 0              | 0.728027                | 1.548969  | 2.207720  |
| 7                | 1                | 0              | 2.062016                | 2.680876  | 0.000000  |

|    |   |   |           |           |           |
|----|---|---|-----------|-----------|-----------|
| 8  | 1 | 0 | -1.312848 | 0.788085  | 0.000000  |
| 9  | 1 | 0 | 3.150854  | 0.296853  | 1.595628  |
| 10 | 1 | 0 | 0.721276  | -1.177995 | 2.483825  |
| 11 | 1 | 0 | 0.728027  | 1.548969  | -2.207720 |
| 12 | 1 | 0 | 3.150854  | 0.296853  | -1.595628 |
| 13 | 1 | 0 | -0.620462 | -1.026009 | 0.920147  |
| 14 | 1 | 0 | 2.432776  | -2.175632 | 0.000000  |
| 15 | 1 | 0 | 0.721276  | -1.177995 | -2.483825 |
| 16 | 6 | 0 | -0.796641 | 2.978132  | 0.000000  |
| 17 | 7 | 0 | -2.104314 | 3.311517  | 0.000000  |
| 18 | 7 | 0 | -0.155504 | 4.165726  | 0.000000  |
| 19 | 1 | 0 | -2.834990 | 2.611504  | 0.000000  |
| 20 | 1 | 0 | 0.854739  | 4.235537  | 0.000000  |
| 21 | 6 | 0 | -1.042233 | 5.227693  | 0.000000  |
| 22 | 6 | 0 | -2.288556 | 4.682274  | 0.000000  |
| 23 | 1 | 0 | -0.717708 | 6.256225  | 0.000000  |
| 24 | 1 | 0 | -3.264413 | 5.141099  | 0.000000  |
| 25 | 5 | 0 | 1.592709  | 1.588698  | 0.000000  |
| 26 | 5 | 0 | 0.000510  | -1.594880 | 0.000000  |
| 27 | 5 | 0 | 1.707855  | -1.224638 | 0.000000  |
| 28 | 6 | 0 | 0.728234  | 0.972717  | -1.286961 |
| 29 | 5 | 0 | 2.213608  | 0.237948  | -0.873803 |
| 30 | 6 | 0 | -0.278301 | -3.160214 | 0.000000  |
| 31 | 7 | 0 | -1.474804 | -3.785679 | 0.000000  |
| 32 | 1 | 0 | -2.358886 | -3.293236 | 0.000000  |
| 33 | 6 | 0 | -1.325766 | -5.160478 | 0.000000  |
| 34 | 1 | 0 | -2.165280 | -5.837433 | 0.000000  |
| 35 | 7 | 0 | 0.624268  | -4.156527 | 0.000000  |
| 36 | 1 | 0 | 1.621314  | -3.965580 | 0.000000  |
| 37 | 6 | 0 | 0.015976  | -5.395199 | 0.000000  |
| 38 | 1 | 0 | 0.574018  | -6.318060 | 0.000000  |
| 39 | 1 | 0 | -0.620462 | -1.026009 | -0.920147 |

-----  
TSm-2a/27a

Standard orientation:

| Center<br>Number | Atomic<br>Number | Atomic<br>Type | Coordinates (Angstroms) |           |           |
|------------------|------------------|----------------|-------------------------|-----------|-----------|
|                  |                  |                | X                       | Y         | Z         |
| 1                | 6                | 0              | 0.921891                | -0.869027 | -0.805440 |
| 2                | 5                | 0              | 1.785089                | -0.499033 | 0.350705  |
| 3                | 5                | 0              | 0.559049                | 0.771833  | -1.299215 |
| 4                | 5                | 0              | -0.632329               | -0.724512 | -0.938702 |
| 5                | 5                | 0              | -1.306750               | 1.886258  | 0.562401  |
| 6                | 1                | 0              | 1.368076                | -1.370807 | -1.665861 |
| 7                | 1                | 0              | 2.418420                | 2.084976  | 0.147121  |
| 8                | 1                | 0              | 1.371352                | -0.210016 | 1.432866  |
| 9                | 1                | 0              | 0.953863                | 0.870453  | -2.420517 |
| 10               | 1                | 0              | -1.200251               | -1.384705 | -1.754622 |
| 11               | 1                | 0              | 0.218082                | 3.297649  | 1.477759  |
| 12               | 1                | 0              | -0.162502               | 3.170123  | -1.597959 |
| 13               | 1                | 0              | -1.057464               | -1.111062 | 0.298754  |
| 14               | 1                | 0              | -2.130308               | 1.135703  | -1.809306 |



|    |   |   |           |           |           |
|----|---|---|-----------|-----------|-----------|
| 15 | 1 | 0 | -2.302166 | 2.415745  | 0.948157  |
| 16 | 6 | 0 | 3.359026  | -0.606580 | 0.263247  |
| 17 | 7 | 0 | 4.235984  | -0.437341 | 1.274643  |
| 18 | 7 | 0 | 4.130750  | -0.870695 | -0.811932 |
| 19 | 1 | 0 | 3.945589  | -0.209054 | 2.217857  |
| 20 | 1 | 0 | 3.750044  | -1.023580 | -1.737957 |
| 21 | 6 | 0 | 5.471148  | -0.864520 | -0.486648 |
| 22 | 6 | 0 | 5.538630  | -0.589819 | 0.847849  |
| 23 | 1 | 0 | 6.248397  | -1.049707 | -1.211173 |
| 24 | 1 | 0 | 6.385487  | -0.493052 | 1.508656  |
| 25 | 5 | 0 | 1.256683  | 1.830567  | 0.120798  |
| 26 | 5 | 0 | -1.766317 | -0.023639 | 0.392520  |
| 27 | 5 | 0 | -1.284242 | 0.985534  | -0.976697 |
| 28 | 6 | 0 | 0.112719  | 2.383221  | 0.896927  |
| 29 | 5 | 0 | -0.149049 | 2.297941  | -0.789883 |
| 30 | 6 | 0 | -3.302891 | -0.428019 | 0.288065  |
| 31 | 7 | 0 | -4.112608 | -0.815656 | 1.294906  |
| 32 | 1 | 0 | -3.803211 | -0.883372 | 2.255983  |
| 33 | 6 | 0 | -5.392419 | -1.083375 | 0.840912  |
| 34 | 1 | 0 | -6.188241 | -1.400778 | 1.495652  |
| 35 | 7 | 0 | -4.084730 | -0.457150 | -0.805953 |
| 36 | 1 | 0 | -3.737277 | -0.167665 | -1.713768 |
| 37 | 6 | 0 | -5.371953 | -0.855720 | -0.501026 |
| 38 | 1 | 0 | -6.148002 | -0.936458 | -1.245408 |
| 39 | 1 | 0 | -1.443228 | 0.189791  | 1.539169  |

-----  
27a

Standard orientation:

| Center<br>Number | Atomic<br>Number | Atomic<br>Type | Coordinates (Angstroms) |           |           |
|------------------|------------------|----------------|-------------------------|-----------|-----------|
|                  |                  |                | X                       | Y         | Z         |
| 1                | 6                | 0              | -0.881382               | -1.180428 | 0.104351  |
| 2                | 5                | 0              | -1.821167               | -0.098077 | -0.333246 |
| 3                | 5                | 0              | -0.743788               | 0.221020  | 1.131176  |
| 4                | 5                | 0              | 0.636303                | -1.096507 | 0.308676  |
| 5                | 5                | 0              | 1.339379                | 1.829811  | -0.243095 |
| 6                | 1                | 0              | -1.331570               | -2.032866 | 0.615815  |
| 7                | 1                | 0              | -2.363918               | 2.266898  | -0.179877 |
| 8                | 1                | 0              | -1.452880               | 0.666964  | -1.270095 |
| 9                | 1                | 0              | -1.218662               | 0.085831  | 2.212666  |
| 10               | 1                | 0              | 1.206894                | -2.016902 | 0.819963  |
| 11               | 1                | 0              | -0.138487               | 3.508449  | -0.670433 |
| 12               | 1                | 0              | -0.086165               | 2.497630  | 2.040519  |
| 13               | 1                | 0              | 1.199243                | -0.940836 | -1.013496 |
| 14               | 1                | 0              | 1.791199                | 0.400016  | 2.006406  |
| 15               | 1                | 0              | 2.339344                | 2.486859  | -0.252206 |
| 16               | 6                | 0              | -3.387567               | -0.316684 | -0.226172 |
| 17               | 7                | 0              | -4.376036               | 0.585333  | -0.076083 |
| 18               | 7                | 0              | -4.021804               | -1.506541 | -0.291031 |
| 19               | 1                | 0              | -4.187629               | 1.577046  | 0.018387  |
| 20               | 1                | 0              | -3.532864               | -2.382736 | -0.423033 |
| 21               | 6                | 0              | -5.391820               | -1.357376 | -0.178561 |

|    |   |   |           |           |           |
|----|---|---|-----------|-----------|-----------|
| 22 | 6 | 0 | -5.616403 | -0.021470 | -0.041113 |
| 23 | 1 | 0 | -6.072988 | -2.192926 | -0.206618 |
| 24 | 1 | 0 | -6.532595 | 0.534842  | 0.077880  |
| 25 | 5 | 0 | -1.335553 | 1.656367  | -0.243644 |
| 26 | 5 | 0 | 1.835262  | 0.019449  | -0.492211 |
| 27 | 5 | 0 | 1.116004  | 0.529849  | 1.034153  |
| 28 | 6 | 0 | -0.044337 | 2.441337  | -0.494425 |
| 29 | 5 | 0 | 0.030353  | 1.881162  | 1.030852  |
| 30 | 6 | 0 | 3.369646  | -0.329629 | -0.316104 |
| 31 | 7 | 0 | 4.412391  | 0.509010  | -0.466064 |
| 32 | 1 | 0 | 4.295625  | 1.489574  | -0.692367 |
| 33 | 6 | 0 | 5.613585  | -0.128049 | -0.200218 |
| 34 | 1 | 0 | 6.563918  | 0.377521  | -0.262403 |
| 35 | 7 | 0 | 3.921003  | -1.507352 | 0.033889  |
| 36 | 1 | 0 | 3.367320  | -2.326607 | 0.252086  |
| 37 | 6 | 0 | 5.301183  | -1.411874 | 0.118190  |
| 38 | 1 | 0 | 5.924832  | -2.248842 | 0.388516  |
| 39 | 1 | 0 | 1.619110  | 0.796610  | -1.425669 |

-----  
TS27a/p-2a

Standard orientation:

| Center<br>Number | Atomic<br>Number | Atomic<br>Type | Coordinates (Angstroms) |           |           |
|------------------|------------------|----------------|-------------------------|-----------|-----------|
|                  |                  |                | X                       | Y         | Z         |
| 1                | 6                | 0              | -0.045920               | 2.299118  | -1.086930 |
| 2                | 5                | 0              | -1.776019               | -0.224344 | -0.546499 |
| 3                | 5                | 0              | -0.496951               | 0.929970  | 1.242507  |
| 4                | 5                | 0              | -1.206935               | 1.747038  | -0.292007 |
| 5                | 5                | 0              | 0.113412                | 2.435084  | 0.610900  |
| 6                | 5                | 0              | -0.739409               | -0.844565 | 0.729857  |
| 7                | 5                | 0              | 1.683696                | -0.001233 | -0.285974 |
| 8                | 5                | 0              | 1.328013                | 1.215792  | 0.942063  |
| 9                | 5                | 0              | 1.374520                | 1.939706  | -0.649221 |
| 10               | 6                | 0              | 0.698421                | -0.356926 | 1.006157  |
| 11               | 1                | 0              | -0.196909               | 3.161548  | -1.734929 |
| 12               | 1                | 0              | -1.568833               | 0.046879  | -1.685859 |
| 13               | 1                | 0              | -1.062231               | 0.942339  | 2.289534  |
| 14               | 1                | 0              | -2.351649               | 2.086313  | -0.273795 |
| 15               | 1                | 0              | -0.011807               | 3.398932  | 1.295344  |
| 16               | 1                | 0              | -1.292463               | -1.567506 | 1.503293  |
| 17               | 1                | 0              | 1.209260                | -0.302811 | -1.341317 |
| 18               | 1                | 0              | 2.170979                | 1.380076  | 1.772728  |
| 19               | 1                | 0              | 2.346491                | 2.543898  | -0.986817 |
| 20               | 1                | 0              | 1.097486                | -0.805642 | 1.913460  |
| 21               | 6                | 0              | 3.197721                | -0.472936 | -0.199673 |
| 22               | 7                | 0              | 4.146544                | -0.201476 | 0.720565  |
| 23               | 1                | 0              | 3.971096                | 0.413564  | 1.506247  |
| 24               | 6                | 0              | 5.353253                | -0.798186 | 0.401895  |
| 25               | 1                | 0              | 6.234364                | -0.692099 | 1.014510  |
| 26               | 7                | 0              | 3.826065                | -1.253995 | -1.104559 |
| 27               | 1                | 0              | 3.361858                | -1.610824 | -1.929509 |
| 28               | 6                | 0              | 5.150098                | -1.469929 | -0.763436 |

|    |   |   |           |           |           |
|----|---|---|-----------|-----------|-----------|
| 29 | 1 | 0 | 5.817911  | -2.065358 | -1.365270 |
| 30 | 6 | 0 | -3.300722 | -0.551841 | -0.281144 |
| 31 | 7 | 0 | -4.309606 | -0.338474 | -1.152189 |
| 32 | 1 | 0 | -4.161912 | 0.031926  | -2.083227 |
| 33 | 6 | 0 | -5.532080 | -0.664866 | -0.601045 |
| 34 | 1 | 0 | -6.461165 | -0.559720 | -1.138581 |
| 35 | 7 | 0 | -3.905494 | -1.019758 | 0.828791  |
| 36 | 1 | 0 | -3.388527 | -1.257754 | 1.667309  |
| 37 | 6 | 0 | -5.272705 | -1.104834 | 0.662946  |
| 38 | 1 | 0 | -5.932577 | -1.459917 | 1.438627  |
| 39 | 1 | 0 | -0.973970 | -1.252751 | -0.500743 |

nhcx-iPR2 (Idip)

Standard orientation:

| Center<br>Number | Atomic<br>Number | Atomic<br>Type | Coordinates (Angstroms) |           |           |
|------------------|------------------|----------------|-------------------------|-----------|-----------|
|                  |                  |                | X                       | Y         | Z         |
| 1                | 6                | 0              | 0.337847                | -0.041602 | 0.000000  |
| 2                | 7                | 0              | -0.520182               | 1.033518  | -0.000000 |
| 3                | 6                | 0              | -1.866857               | 0.661824  | -0.000000 |
| 4                | 1                | 0              | -2.669875               | 1.383322  | -0.000000 |
| 5                | 7                | 0              | -0.545294               | -1.096231 | 0.000000  |
| 6                | 6                | 0              | -1.883151               | -0.692693 | 0.000000  |
| 7                | 1                | 0              | -2.702735               | -1.395435 | 0.000000  |
| 8                | 6                | 0              | -0.085488               | 2.406978  | -0.000000 |
| 9                | 6                | 0              | 0.111871                | 3.060458  | 1.232716  |
| 10               | 6                | 0              | 0.111871                | 3.060458  | -1.232716 |
| 11               | 6                | 0              | 0.506759                | 4.403706  | 1.204867  |
| 12               | 6                | 0              | 0.506759                | 4.403706  | -1.204867 |
| 13               | 6                | 0              | 0.699964                | 5.072879  | -0.000000 |
| 14               | 1                | 0              | 0.668218                | 4.930868  | 2.141268  |
| 15               | 1                | 0              | 0.668218                | 4.930868  | -2.141268 |
| 16               | 1                | 0              | 1.006441                | 6.115775  | -0.000000 |
| 17               | 6                | 0              | -0.140428               | -2.480091 | 0.000000  |
| 18               | 6                | 0              | 0.046367                | -3.133478 | -1.234446 |
| 19               | 6                | 0              | 0.046367                | -3.133478 | 1.234446  |
| 20               | 6                | 0              | 0.427905                | -4.480455 | -1.206507 |
| 21               | 6                | 0              | 0.427905                | -4.480455 | 1.206507  |
| 22               | 6                | 0              | 0.613941                | -5.149262 | 0.000000  |
| 23               | 1                | 0              | 0.583919                | -5.012819 | -2.139606 |
| 24               | 1                | 0              | 0.583919                | -5.012819 | 2.139606  |
| 25               | 1                | 0              | 0.908985                | -6.195534 | 0.000000  |
| 26               | 6                | 0              | -0.089758               | -2.387298 | -2.558094 |
| 27               | 6                | 0              | -0.709683               | -3.235142 | -3.681473 |
| 28               | 6                | 0              | 1.279927                | -1.816178 | -2.981361 |
| 29               | 1                | 0              | -0.758557               | -1.535863 | -2.392186 |
| 30               | 1                | 0              | -1.664605               | -3.677248 | -3.375263 |
| 31               | 1                | 0              | -0.892488               | -2.608699 | -4.562121 |
| 32               | 1                | 0              | -0.047709               | -4.049242 | -3.998660 |
| 33               | 1                | 0              | 1.675771                | -1.155813 | -2.203354 |
| 34               | 1                | 0              | 2.002522                | -2.624084 | -3.150377 |
| 35               | 1                | 0              | 1.187806                | -1.243793 | -3.912870 |

|    |   |   |           |           |           |
|----|---|---|-----------|-----------|-----------|
| 36 | 6 | 0 | -0.089758 | -2.387298 | 2.558094  |
| 37 | 6 | 0 | 1.279927  | -1.816178 | 2.981361  |
| 38 | 6 | 0 | -0.709683 | -3.235142 | 3.681473  |
| 39 | 1 | 0 | -0.758557 | -1.535863 | 2.392186  |
| 40 | 1 | 0 | 1.675771  | -1.155813 | 2.203354  |
| 41 | 1 | 0 | 1.187806  | -1.243793 | 3.912870  |
| 42 | 1 | 0 | 2.002522  | -2.624084 | 3.150377  |
| 43 | 1 | 0 | -1.664605 | -3.677248 | 3.375263  |
| 44 | 1 | 0 | -0.047709 | -4.049242 | 3.998660  |
| 45 | 1 | 0 | -0.892488 | -2.608699 | 4.562121  |
| 46 | 6 | 0 | -0.070621 | 2.353048  | 2.571362  |
| 47 | 6 | 0 | -1.165050 | 3.019268  | 3.426719  |
| 48 | 6 | 0 | 1.262758  | 2.265616  | 3.338459  |
| 49 | 1 | 0 | -0.391346 | 1.327779  | 2.368654  |
| 50 | 1 | 0 | -2.123561 | 3.047956  | 2.896191  |
| 51 | 1 | 0 | -1.310669 | 2.463289  | 4.360550  |
| 52 | 1 | 0 | -0.900741 | 4.049620  | 3.692563  |
| 53 | 1 | 0 | 2.022029  | 1.751280  | 2.740809  |
| 54 | 1 | 0 | 1.647529  | 3.260492  | 3.592896  |
| 55 | 1 | 0 | 1.129308  | 1.710344  | 4.274717  |
| 56 | 6 | 0 | -0.070621 | 2.353048  | -2.571362 |
| 57 | 6 | 0 | 1.262758  | 2.265616  | -3.338459 |
| 58 | 6 | 0 | -1.165050 | 3.019268  | -3.426719 |
| 59 | 1 | 0 | -0.391346 | 1.327779  | -2.368654 |
| 60 | 1 | 0 | 2.022029  | 1.751280  | -2.740809 |
| 61 | 1 | 0 | 1.129308  | 1.710344  | -4.274717 |
| 62 | 1 | 0 | 1.647529  | 3.260492  | -3.592896 |
| 63 | 1 | 0 | -2.123561 | 3.047956  | -2.896191 |
| 64 | 1 | 0 | -0.900741 | 4.049620  | -3.692563 |
| 65 | 1 | 0 | -1.310669 | 2.463289  | -4.360550 |

-----  
full(o-1)

Standard orientation:

| Center<br>Number | Atomic<br>Number | Atomic<br>Type | Coordinates (Angstroms) |           |           |
|------------------|------------------|----------------|-------------------------|-----------|-----------|
|                  |                  |                | X                       | Y         | Z         |
| 1                | 7                | 0              | -1.177796               | -0.138116 | -1.022429 |
| 2                | 1                | 0              | 1.295070                | 1.325296  | 5.448399  |
| 3                | 7                | 0              | 0.985430                | -0.072331 | -1.158956 |
| 4                | 1                | 0              | 1.659521                | -1.762633 | 4.210119  |
| 5                | 6                | 0              | -2.570637               | -0.183117 | -0.606756 |
| 6                | 1                | 0              | 3.078113                | 0.663395  | 3.347749  |
| 7                | 6                | 0              | -0.047247               | 0.012516  | -0.260089 |
| 8                | 1                | 0              | 2.162965                | -0.731400 | 1.553254  |
| 9                | 6                | 0              | 2.409376                | 0.019075  | -0.906429 |
| 10               | 1                | 0              | -1.127347               | 2.696947  | 1.267929  |
| 11               | 6                | 0              | -3.112014               | -1.424144 | -0.213379 |
| 12               | 1                | 0              | 0.138958                | 2.306199  | 2.820005  |
| 13               | 6                | 0              | -0.843677               | -0.309479 | -2.361027 |
| 14               | 1                | 0              | -1.602843               | -0.451228 | -3.112167 |
| 15               | 1                | 0              | -1.293197               | 2.365912  | 4.279337  |
| 16               | 6                | 0              | -3.349009               | 0.986565  | -0.726559 |

|    |   |   |           |           |           |
|----|---|---|-----------|-----------|-----------|
| 17 | 1 | 0 | -2.409497 | 0.035336  | 2.339728  |
| 18 | 6 | 0 | 3.155527  | -1.177962 | -0.870527 |
| 19 | 1 | 0 | -1.109691 | -0.501606 | 4.936924  |
| 20 | 6 | 0 | 3.000590  | 1.291491  | -0.783472 |
| 21 | 6 | 0 | -2.291522 | -2.711019 | -0.173387 |
| 22 | 1 | 0 | -1.234168 | -2.438046 | -0.107830 |
| 23 | 6 | 0 | -4.475921 | -1.459134 | 0.097670  |
| 24 | 1 | 0 | -4.925918 | -2.394911 | 0.412379  |
| 25 | 6 | 0 | 0.503519  | -0.266444 | -2.447940 |
| 26 | 1 | 0 | 1.171105  | -0.353418 | -3.289631 |
| 27 | 6 | 0 | 4.540072  | -1.067677 | -0.694963 |
| 28 | 1 | 0 | 5.145186  | -1.968774 | -0.659560 |
| 29 | 6 | 0 | 2.204375  | 2.589573  | -0.874464 |
| 30 | 1 | 0 | 1.140382  | 2.342478  | -0.836559 |
| 31 | 6 | 0 | -4.707157 | 0.887720  | -0.400802 |
| 32 | 1 | 0 | -5.336341 | 1.768797  | -0.472184 |
| 33 | 6 | 0 | 5.152283  | 0.175094  | -0.561269 |
| 34 | 1 | 0 | 6.228252  | 0.237465  | -0.422956 |
| 35 | 6 | 0 | -2.789517 | 2.310963  | -1.242624 |
| 36 | 1 | 0 | -1.702028 | 2.288958  | -1.121349 |
| 37 | 6 | 0 | 1.443023  | -0.171385 | 2.139651  |
| 38 | 6 | 0 | 2.521750  | -2.560103 | -1.021193 |
| 39 | 1 | 0 | 1.434427  | -2.438431 | -1.045157 |
| 40 | 6 | 0 | 1.996499  | 0.586350  | 3.278054  |
| 41 | 6 | 0 | -5.265255 | -0.317114 | 0.011955  |
| 42 | 1 | 0 | -6.321233 | -0.367649 | 0.263399  |
| 43 | 6 | 0 | 4.389153  | 1.337674  | -0.605813 |
| 44 | 1 | 0 | 4.878497  | 2.301593  | -0.505197 |
| 45 | 6 | 0 | 2.472485  | 3.298588  | -2.217841 |
| 46 | 1 | 0 | 1.870572  | 4.211595  | -2.293103 |
| 47 | 1 | 0 | 2.221491  | 2.655997  | -3.069743 |
| 48 | 1 | 0 | 3.527038  | 3.583039  | -2.314130 |
| 49 | 6 | 0 | 2.481812  | 3.527671  | 0.314299  |
| 50 | 1 | 0 | 2.289037  | 3.023469  | 1.265918  |
| 51 | 1 | 0 | 1.827693  | 4.404677  | 0.256405  |
| 52 | 1 | 0 | 3.516884  | 3.888968  | 0.318698  |
| 53 | 6 | 0 | -2.490273 | -3.520664 | -1.472813 |
| 54 | 1 | 0 | -1.883821 | -4.433958 | -1.451115 |
| 55 | 1 | 0 | -2.202412 | -2.946211 | -2.360418 |
| 56 | 1 | 0 | -3.539464 | -3.816074 | -1.592167 |
| 57 | 6 | 0 | -2.601199 | -3.583367 | 1.056024  |
| 58 | 1 | 0 | -2.512077 | -3.010111 | 1.982527  |
| 59 | 1 | 0 | -1.893180 | -4.418372 | 1.103927  |
| 60 | 1 | 0 | -3.607801 | -4.014886 | 1.009960  |
| 61 | 5 | 0 | 0.072735  | 0.374868  | 1.279144  |
| 62 | 6 | 0 | -3.097443 | 2.488342  | -2.745406 |
| 63 | 1 | 0 | -4.179505 | 2.507234  | -2.921440 |
| 64 | 1 | 0 | -2.675973 | 1.680149  | -3.352478 |
| 65 | 1 | 0 | -2.680322 | 3.434137  | -3.110942 |
| 66 | 1 | 0 | -0.267044 | -2.061793 | 2.158038  |
| 67 | 6 | 0 | -3.306942 | 3.529317  | -0.456039 |
| 68 | 1 | 0 | -3.158595 | 3.403354  | 0.619321  |
| 69 | 1 | 0 | -4.371873 | 3.712279  | -0.640296 |

|    |   |   |           |           |           |
|----|---|---|-----------|-----------|-----------|
| 70 | 1 | 0 | -2.765923 | 4.428628  | -0.771744 |
| 71 | 6 | 0 | 2.940302  | -3.218439 | -2.351635 |
| 72 | 1 | 0 | 4.022686  | -3.387939 | -2.387960 |
| 73 | 1 | 0 | 2.673533  | -2.595629 | -3.213085 |
| 74 | 1 | 0 | 2.445349  | -4.189251 | -2.469420 |
| 75 | 5 | 0 | -0.049706 | -0.938463 | 2.488787  |
| 76 | 5 | 0 | -1.267571 | 0.328747  | 2.504550  |
| 77 | 5 | 0 | -0.599522 | 1.802732  | 1.849289  |
| 78 | 5 | 0 | -0.694614 | 1.613929  | 3.576341  |
| 79 | 5 | 0 | -0.431834 | -0.084265 | 4.048804  |
| 80 | 6 | 0 | 2.844096  | -3.483611 | 0.169841  |
| 81 | 1 | 0 | 2.510924  | -3.049972 | 1.117969  |
| 82 | 1 | 0 | 3.918237  | -3.685977 | 0.248524  |
| 83 | 1 | 0 | 2.335909  | -4.446440 | 0.043758  |
| 84 | 5 | 0 | 1.004820  | 0.913420  | 4.368898  |
| 85 | 5 | 0 | 1.168230  | -0.781317 | 3.753718  |

-----  
full(o-2)

Standard orientation:

| Center<br>Number | Atomic<br>Number | Atomic<br>Type | Coordinates (Angstroms) |           |           |
|------------------|------------------|----------------|-------------------------|-----------|-----------|
|                  |                  |                | X                       | Y         | Z         |
| 1                | 5                | 0              | 0.102958                | -0.418962 | 1.533453  |
| 2                | 5                | 0              | 1.225127                | -1.817601 | 1.404628  |
| 3                | 5                | 0              | -0.372808               | -2.197589 | -0.844417 |
| 4                | 5                | 0              | 1.087746                | -2.830658 | 0.000000  |
| 5                | 5                | 0              | 0.102958                | -0.418962 | -1.533453 |
| 6                | 5                | 0              | 2.280627                | -1.536426 | 0.000000  |
| 7                | 5                | 0              | 1.225127                | -1.817601 | -1.404628 |
| 8                | 6                | 0              | 1.533685                | -0.203234 | -0.766362 |
| 9                | 1                | 0              | -1.054009               | -2.889524 | 1.545531  |
| 10               | 1                | 0              | -0.826117               | 0.056558  | 0.949718  |
| 11               | 1                | 0              | 1.756749                | -2.098358 | 2.427131  |
| 12               | 1                | 0              | -1.054009               | -2.889524 | -1.545531 |
| 13               | 1                | 0              | 1.461198                | -3.967195 | 0.000000  |
| 14               | 1                | 0              | 2.313862                | 0.405436  | 1.211248  |
| 15               | 1                | 0              | -0.826117               | 0.056558  | -0.949718 |
| 16               | 1                | 0              | 3.468742                | -1.608214 | 0.000000  |
| 17               | 1                | 0              | 1.756749                | -2.098358 | -2.427131 |
| 18               | 1                | 0              | 2.313862                | 0.405436  | -1.211248 |
| 19               | 6                | 0              | -0.049007               | 0.039176  | -3.065798 |
| 20               | 7                | 0              | 0.854373                | 0.260619  | -4.082126 |
| 21               | 6                | 0              | 0.212609                | 0.763016  | -5.210826 |
| 22               | 1                | 0              | 0.760985                | 0.998115  | -6.107989 |
| 23               | 7                | 0              | -1.257268               | 0.411637  | -3.610408 |
| 24               | 6                | 0              | -1.102406               | 0.850712  | -4.917389 |
| 25               | 1                | 0              | -1.943701               | 1.177638  | -5.505612 |
| 26               | 6                | 0              | -0.049007               | 0.039176  | 3.065798  |
| 27               | 7                | 0              | 0.854373                | 0.260619  | 4.082126  |
| 28               | 6                | 0              | 0.212609                | 0.763016  | 5.210826  |
| 29               | 1                | 0              | 0.760985                | 0.998115  | 6.107989  |
| 30               | 7                | 0              | -1.257268               | 0.411637  | 3.610408  |

|    |   |   |           |           |           |
|----|---|---|-----------|-----------|-----------|
| 31 | 6 | 0 | -1.102406 | 0.850712  | 4.917389  |
| 32 | 1 | 0 | -1.943701 | 1.177638  | 5.505612  |
| 33 | 6 | 0 | 1.533685  | -0.203234 | 0.766362  |
| 34 | 5 | 0 | -0.372808 | -2.197589 | 0.844417  |
| 35 | 6 | 0 | 2.284545  | 0.004520  | 4.146601  |
| 36 | 6 | 0 | 3.180323  | 1.021521  | 3.756491  |
| 37 | 6 | 0 | 2.719064  | -1.203623 | 4.733274  |
| 38 | 6 | 0 | 4.548633  | 0.780064  | 3.931428  |
| 39 | 6 | 0 | 4.098156  | -1.385271 | 4.887585  |
| 40 | 6 | 0 | 5.005409  | -0.410528 | 4.486412  |
| 41 | 1 | 0 | 5.265839  | 1.538198  | 3.633969  |
| 42 | 1 | 0 | 4.465658  | -2.307483 | 5.326287  |
| 43 | 1 | 0 | 6.072071  | -0.577129 | 4.611241  |
| 44 | 6 | 0 | 2.284545  | 0.004520  | -4.146601 |
| 45 | 6 | 0 | 2.719064  | -1.203623 | -4.733274 |
| 46 | 6 | 0 | 3.180323  | 1.021521  | -3.756491 |
| 47 | 6 | 0 | 4.098156  | -1.385271 | -4.887585 |
| 48 | 6 | 0 | 4.548633  | 0.780064  | -3.931428 |
| 49 | 6 | 0 | 5.005409  | -0.410528 | -4.486412 |
| 50 | 1 | 0 | 4.465658  | -2.307483 | -5.326287 |
| 51 | 1 | 0 | 5.265839  | 1.538198  | -3.633969 |
| 52 | 1 | 0 | 6.072071  | -0.577129 | -4.611241 |
| 53 | 6 | 0 | -2.574980 | 0.343329  | 3.004767  |
| 54 | 6 | 0 | -3.137661 | 1.501435  | 2.428494  |
| 55 | 6 | 0 | -3.293267 | -0.870359 | 3.119225  |
| 56 | 6 | 0 | -4.440313 | 1.391653  | 1.919625  |
| 57 | 6 | 0 | -4.590367 | -0.908788 | 2.596521  |
| 58 | 6 | 0 | -5.160031 | 0.207118  | 1.994715  |
| 59 | 1 | 0 | -4.893655 | 2.267063  | 1.461026  |
| 60 | 1 | 0 | -5.161204 | -1.828361 | 2.660155  |
| 61 | 1 | 0 | -6.166551 | 0.153184  | 1.588286  |
| 62 | 6 | 0 | -2.574980 | 0.343329  | -3.004767 |
| 63 | 6 | 0 | -3.293267 | -0.870359 | -3.119225 |
| 64 | 6 | 0 | -3.137661 | 1.501435  | -2.428494 |
| 65 | 6 | 0 | -4.590367 | -0.908788 | -2.596521 |
| 66 | 6 | 0 | -4.440313 | 1.391653  | -1.919625 |
| 67 | 6 | 0 | -5.160031 | 0.207118  | -1.994715 |
| 68 | 1 | 0 | -5.161204 | -1.828361 | -2.660155 |
| 69 | 1 | 0 | -4.893655 | 2.267063  | -1.461026 |
| 70 | 1 | 0 | -6.166551 | 0.153184  | -1.588286 |
| 71 | 6 | 0 | -2.739517 | -2.093179 | 3.850987  |
| 72 | 6 | 0 | -3.228652 | -3.429502 | 3.265844  |
| 73 | 6 | 0 | -3.086114 | -2.031640 | 5.355508  |
| 74 | 1 | 0 | -1.651173 | -2.084624 | 3.745131  |
| 75 | 1 | 0 | -3.065170 | -3.473984 | 2.186771  |
| 76 | 1 | 0 | -2.668538 | -4.252431 | 3.723317  |
| 77 | 1 | 0 | -4.290804 | -3.605931 | 3.476133  |
| 78 | 1 | 0 | -2.679642 | -1.139450 | 5.842031  |
| 79 | 1 | 0 | -4.173097 | -2.029238 | 5.502878  |
| 80 | 1 | 0 | -2.679181 | -2.908458 | 5.873287  |
| 81 | 6 | 0 | -2.739517 | -2.093179 | -3.850987 |
| 82 | 6 | 0 | -3.086114 | -2.031640 | -5.355508 |
| 83 | 6 | 0 | -3.228652 | -3.429502 | -3.265844 |

|     |   |   |           |           |           |
|-----|---|---|-----------|-----------|-----------|
| 84  | 1 | 0 | -1.651173 | -2.084624 | -3.745131 |
| 85  | 1 | 0 | -2.679642 | -1.139450 | -5.842031 |
| 86  | 1 | 0 | -2.679181 | -2.908458 | -5.873287 |
| 87  | 1 | 0 | -4.173097 | -2.029238 | -5.502878 |
| 88  | 1 | 0 | -3.065170 | -3.473984 | -2.186771 |
| 89  | 1 | 0 | -4.290804 | -3.605931 | -3.476133 |
| 90  | 1 | 0 | -2.668538 | -4.252431 | -3.723317 |
| 91  | 6 | 0 | -2.530182 | 2.910149  | 2.367074  |
| 92  | 6 | 0 | -1.021739 | 3.044599  | 2.111310  |
| 93  | 6 | 0 | -2.944073 | 3.736127  | 3.605239  |
| 94  | 1 | 0 | -3.024697 | 3.379889  | 1.506332  |
| 95  | 1 | 0 | -0.680519 | 2.371766  | 1.320562  |
| 96  | 1 | 0 | -0.803128 | 4.076068  | 1.808837  |
| 97  | 1 | 0 | -0.435995 | 2.844795  | 3.012953  |
| 98  | 1 | 0 | -4.028516 | 3.715950  | 3.757783  |
| 99  | 1 | 0 | -2.466886 | 3.353981  | 4.514819  |
| 100 | 1 | 0 | -2.634794 | 4.781565  | 3.485083  |
| 101 | 6 | 0 | 1.755549  | -2.275152 | -5.240725 |
| 102 | 6 | 0 | 2.161438  | -3.700072 | -4.820613 |
| 103 | 6 | 0 | 1.611987  | -2.194443 | -6.775846 |
| 104 | 1 | 0 | 0.773102  | -2.081569 | -4.800310 |
| 105 | 1 | 0 | 2.284984  | -3.774378 | -3.737406 |
| 106 | 1 | 0 | 1.381346  | -4.407764 | -5.123682 |
| 107 | 1 | 0 | 3.093490  | -4.019319 | -5.301691 |
| 108 | 1 | 0 | 1.256442  | -1.212049 | -7.105136 |
| 109 | 1 | 0 | 2.572694  | -2.383942 | -7.269534 |
| 110 | 1 | 0 | 0.897671  | -2.946462 | -7.131142 |
| 111 | 6 | 0 | 2.706465  | 2.373354  | -3.227097 |
| 112 | 6 | 0 | 2.611170  | 3.403881  | -4.372772 |
| 113 | 6 | 0 | 3.586384  | 2.930205  | -2.093775 |
| 114 | 1 | 0 | 1.702970  | 2.238832  | -2.815197 |
| 115 | 1 | 0 | 1.926017  | 3.074687  | -5.160849 |
| 116 | 1 | 0 | 2.248460  | 4.366650  | -3.993225 |
| 117 | 1 | 0 | 3.594048  | 3.569038  | -4.830166 |
| 118 | 1 | 0 | 3.722631  | 2.199979  | -1.290152 |
| 119 | 1 | 0 | 4.578514  | 3.229113  | -2.451221 |
| 120 | 1 | 0 | 3.115176  | 3.821921  | -1.665153 |
| 121 | 6 | 0 | 1.755549  | -2.275152 | 5.240725  |
| 122 | 6 | 0 | 1.611987  | -2.194443 | 6.775846  |
| 123 | 6 | 0 | 2.161438  | -3.700072 | 4.820613  |
| 124 | 1 | 0 | 0.773102  | -2.081569 | 4.800310  |
| 125 | 1 | 0 | 1.256442  | -1.212049 | 7.105136  |
| 126 | 1 | 0 | 0.897671  | -2.946462 | 7.131142  |
| 127 | 1 | 0 | 2.572694  | -2.383942 | 7.269534  |
| 128 | 1 | 0 | 2.284984  | -3.774378 | 3.737406  |
| 129 | 1 | 0 | 3.093490  | -4.019319 | 5.301691  |
| 130 | 1 | 0 | 1.381346  | -4.407764 | 5.123682  |
| 131 | 6 | 0 | 2.706465  | 2.373354  | 3.227097  |
| 132 | 6 | 0 | 3.586384  | 2.930205  | 2.093775  |
| 133 | 6 | 0 | 2.611170  | 3.403881  | 4.372772  |
| 134 | 1 | 0 | 1.702970  | 2.238832  | 2.815197  |
| 135 | 1 | 0 | 3.722631  | 2.199979  | 1.290152  |
| 136 | 1 | 0 | 3.115176  | 3.821921  | 1.665153  |



|     |   |   |           |          |           |
|-----|---|---|-----------|----------|-----------|
| 137 | 1 | 0 | 4.578514  | 3.229113 | 2.451221  |
| 138 | 1 | 0 | 1.926017  | 3.074687 | 5.160849  |
| 139 | 1 | 0 | 3.594048  | 3.569038 | 4.830166  |
| 140 | 1 | 0 | 2.248460  | 4.366650 | 3.993225  |
| 141 | 6 | 0 | -2.530182 | 2.910149 | -2.367074 |
| 142 | 6 | 0 | -2.944073 | 3.736127 | -3.605239 |
| 143 | 6 | 0 | -1.021739 | 3.044599 | -2.111310 |
| 144 | 1 | 0 | -3.024697 | 3.379889 | -1.506332 |
| 145 | 1 | 0 | -4.028516 | 3.715950 | -3.757783 |
| 146 | 1 | 0 | -2.634794 | 4.781565 | -3.485083 |
| 147 | 1 | 0 | -2.466886 | 3.353981 | -4.514819 |
| 148 | 1 | 0 | -0.680519 | 2.371766 | -1.320562 |
| 149 | 1 | 0 | -0.435995 | 2.844795 | -3.012953 |
| 150 | 1 | 0 | -0.803128 | 4.076068 | -1.808837 |

-----  
full(o-2)

Standard orientation:

| Center<br>Number | Atomic<br>Number | Atomic<br>Type | Coordinates (Angstroms) |           |           |
|------------------|------------------|----------------|-------------------------|-----------|-----------|
|                  |                  |                | X                       | Y         | Z         |
| 1                | 5                | 0              | 1.552962                | 0.039730  | -0.348874 |
| 2                | 5                | 0              | 1.530594                | 1.069554  | -1.840221 |
| 3                | 5                | 0              | -0.745234               | -0.499562 | -2.137712 |
| 4                | 5                | 0              | 0.157344                | 0.866187  | -2.884584 |
| 5                | 5                | 0              | -1.500333               | 0.198799  | -0.442950 |
| 6                | 5                | 0              | 0.154547                | 2.179447  | -1.709607 |
| 7                | 5                | 0              | -1.282623               | 1.142881  | -1.944164 |
| 8                | 6                | 0              | -0.662688               | 1.588025  | -0.323189 |
| 9                | 1                | 0              | 1.636385                | -1.313509 | -2.697436 |
| 10               | 1                | 0              | 0.874303                | -0.723789 | 0.272627  |
| 11               | 1                | 0              | 2.570712                | 1.548365  | -2.142324 |
| 12               | 1                | 0              | -1.425772               | -1.268148 | -2.748408 |
| 13               | 1                | 0              | 0.203525                | 1.129064  | -4.050691 |
| 14               | 1                | 0              | 1.331352                | 2.350961  | 0.262399  |
| 15               | 1                | 0              | -0.991741               | -0.758654 | 0.064440  |
| 16               | 1                | 0              | 0.199609                | 3.354825  | -1.897083 |
| 17               | 1                | 0              | -2.282021               | 1.675108  | -2.319668 |
| 18               | 1                | 0              | -1.078368               | 2.446443  | 0.192426  |
| 19               | 6                | 0              | -3.059408               | 0.182686  | -0.045744 |
| 20               | 7                | 0              | -3.860980               | 1.154281  | 0.506146  |
| 21               | 6                | 0              | -5.118523               | 0.641813  | 0.814590  |
| 22               | 1                | 0              | -5.878952               | 1.257493  | 1.266398  |
| 23               | 7                | 0              | -3.862620               | -0.931155 | -0.080083 |
| 24               | 6                | 0              | -5.118418               | -0.656931 | 0.443747  |
| 25               | 1                | 0              | -5.884331               | -1.413187 | 0.493621  |
| 26               | 6                | 0              | 3.049571                | -0.239979 | 0.175451  |
| 27               | 7                | 0              | 4.280621                | 0.351413  | 0.002562  |
| 28               | 6                | 0              | 5.265957                | -0.344957 | 0.695369  |
| 29               | 1                | 0              | 6.296619                | -0.031188 | 0.665665  |
| 30               | 7                | 0              | 3.314636                | -1.313891 | 0.998030  |
| 31               | 6                | 0              | 4.664121                | -1.388148 | 1.306902  |
| 32               | 1                | 0              | 5.059018                | -2.177478 | 1.924929  |

|    |   |   |           |           |           |
|----|---|---|-----------|-----------|-----------|
| 33 | 6 | 0 | 0.869942  | 1.542188  | -0.297291 |
| 34 | 5 | 0 | 0.944327  | -0.543723 | -2.084661 |
| 35 | 6 | 0 | 4.693557  | 1.468895  | -0.831334 |
| 36 | 6 | 0 | 4.675418  | 2.771124  | -0.295922 |
| 37 | 6 | 0 | 5.220751  | 1.178369  | -2.105900 |
| 38 | 6 | 0 | 5.192521  | 3.801749  | -1.090061 |
| 39 | 6 | 0 | 5.727637  | 2.247918  | -2.852031 |
| 40 | 6 | 0 | 5.713250  | 3.546689  | -2.354478 |
| 41 | 1 | 0 | 5.189267  | 4.818772  | -0.710859 |
| 42 | 1 | 0 | 6.132095  | 2.058573  | -3.841877 |
| 43 | 1 | 0 | 6.107937  | 4.362898  | -2.953741 |
| 44 | 6 | 0 | -3.565541 | 2.546158  | 0.791898  |
| 45 | 6 | 0 | -3.962103 | 3.527456  | -0.141019 |
| 46 | 6 | 0 | -2.999667 | 2.874595  | 2.041257  |
| 47 | 6 | 0 | -3.745294 | 4.867769  | 0.203921  |
| 48 | 6 | 0 | -2.809135 | 4.230630  | 2.330586  |
| 49 | 6 | 0 | -3.172960 | 5.219167  | 1.421594  |
| 50 | 1 | 0 | -4.033001 | 5.647351  | -0.494205 |
| 51 | 1 | 0 | -2.372817 | 4.514887  | 3.283446  |
| 52 | 1 | 0 | -3.014316 | 6.266431  | 1.664948  |
| 53 | 6 | 0 | 2.397276  | -2.320370 | 1.503103  |
| 54 | 6 | 0 | 1.922245  | -2.223481 | 2.828194  |
| 55 | 6 | 0 | 2.116090  | -3.434034 | 0.679640  |
| 56 | 6 | 0 | 1.131425  | -3.280799 | 3.302629  |
| 57 | 6 | 0 | 1.329314  | -4.458784 | 1.216818  |
| 58 | 6 | 0 | 0.839511  | -4.388576 | 2.516457  |
| 59 | 1 | 0 | 0.747996  | -3.227163 | 4.318859  |
| 60 | 1 | 0 | 1.100171  | -5.324980 | 0.605255  |
| 61 | 1 | 0 | 0.233552  | -5.197344 | 2.917167  |
| 62 | 6 | 0 | -3.563740 | -2.216848 | -0.683062 |
| 63 | 6 | 0 | -3.833337 | -2.364158 | -2.063987 |
| 64 | 6 | 0 | -3.103743 | -3.281822 | 0.116695  |
| 65 | 6 | 0 | -3.572778 | -3.607027 | -2.647797 |
| 66 | 6 | 0 | -2.839235 | -4.495667 | -0.537014 |
| 67 | 6 | 0 | -3.060654 | -4.660327 | -1.897933 |
| 68 | 1 | 0 | -3.759141 | -3.746659 | -3.707178 |
| 69 | 1 | 0 | -2.462784 | -5.329690 | 0.050337  |
| 70 | 1 | 0 | -2.843016 | -5.612810 | -2.373962 |
| 71 | 6 | 0 | 2.680801  | -3.581357 | -0.730869 |
| 72 | 6 | 0 | 1.660538  | -4.154904 | -1.729229 |
| 73 | 6 | 0 | 3.965634  | -4.437015 | -0.709904 |
| 74 | 1 | 0 | 2.939247  | -2.586458 | -1.100143 |
| 75 | 1 | 0 | 0.742284  | -3.562138 | -1.736611 |
| 76 | 1 | 0 | 2.083300  | -4.120892 | -2.739051 |
| 77 | 1 | 0 | 1.413367  | -5.201873 | -1.513385 |
| 78 | 1 | 0 | 4.736234  | -4.004437 | -0.061450 |
| 79 | 1 | 0 | 3.756576  | -5.451784 | -0.349223 |
| 80 | 1 | 0 | 4.383665  | -4.518851 | -1.720176 |
| 81 | 6 | 0 | -4.469487 | -1.253372 | -2.900325 |
| 82 | 6 | 0 | -6.004683 | -1.425056 | -2.932073 |
| 83 | 6 | 0 | -3.923450 | -1.162537 | -4.336035 |
| 84 | 1 | 0 | -4.244929 | -0.296440 | -2.420634 |
| 85 | 1 | 0 | -6.443926 | -1.419705 | -1.928787 |

|     |   |   |           |           |           |
|-----|---|---|-----------|-----------|-----------|
| 86  | 1 | 0 | -6.467230 | -0.612818 | -3.505550 |
| 87  | 1 | 0 | -6.278657 | -2.372948 | -3.410938 |
| 88  | 1 | 0 | -2.835288 | -1.068103 | -4.336320 |
| 89  | 1 | 0 | -4.205554 | -2.033342 | -4.940127 |
| 90  | 1 | 0 | -4.345340 | -0.279307 | -4.829355 |
| 91  | 6 | 0 | 2.215486  | -1.114363 | 3.847422  |
| 92  | 6 | 0 | 2.314883  | 0.327365  | 3.326402  |
| 93  | 6 | 0 | 3.442806  | -1.464773 | 4.717025  |
| 94  | 1 | 0 | 1.348637  | -1.132916 | 4.521291  |
| 95  | 1 | 0 | 1.533262  | 0.550164  | 2.595457  |
| 96  | 1 | 0 | 2.206233  | 1.020396  | 4.169360  |
| 97  | 1 | 0 | 3.286498  | 0.530457  | 2.867923  |
| 98  | 1 | 0 | 3.352230  | -2.464583 | 5.155164  |
| 99  | 1 | 0 | 4.368027  | -1.433366 | 4.131005  |
| 100 | 1 | 0 | 3.546109  | -0.741618 | 5.535085  |
| 101 | 6 | 0 | -4.655004 | 3.192551  | -1.459530 |
| 102 | 6 | 0 | -4.070990 | 3.968642  | -2.654133 |
| 103 | 6 | 0 | -6.175622 | 3.435215  | -1.351906 |
| 104 | 1 | 0 | -4.498394 | 2.129587  | -1.662610 |
| 105 | 1 | 0 | -2.989905 | 3.826025  | -2.729513 |
| 106 | 1 | 0 | -4.525389 | 3.609058  | -3.584306 |
| 107 | 1 | 0 | -4.277897 | 5.043163  | -2.585766 |
| 108 | 1 | 0 | -6.630085 | 2.839073  | -0.552826 |
| 109 | 1 | 0 | -6.391878 | 4.490232  | -1.145045 |
| 110 | 1 | 0 | -6.670733 | 3.168770  | -2.293052 |
| 111 | 6 | 0 | -2.630866 | 1.820652  | 3.079525  |
| 112 | 6 | 0 | -3.664737 | 1.795439  | 4.223935  |
| 113 | 6 | 0 | -1.206575 | 2.009179  | 3.630618  |
| 114 | 1 | 0 | -2.652647 | 0.843722  | 2.592138  |
| 115 | 1 | 0 | -4.675402 | 1.598153  | 3.849033  |
| 116 | 1 | 0 | -3.414742 | 1.011824  | 4.948976  |
| 117 | 1 | 0 | -3.688020 | 2.753353  | 4.757270  |
| 118 | 1 | 0 | -0.471815 | 2.031464  | 2.820559  |
| 119 | 1 | 0 | -1.107592 | 2.934689  | 4.209983  |
| 120 | 1 | 0 | -0.952699 | 1.177224  | 4.297689  |
| 121 | 6 | 0 | 5.255941  | -0.229778 | -2.693946 |
| 122 | 6 | 0 | 6.705189  | -0.745218 | -2.807007 |
| 123 | 6 | 0 | 4.533034  | -0.306547 | -4.052211 |
| 124 | 1 | 0 | 4.720632  | -0.899084 | -2.014678 |
| 125 | 1 | 0 | 7.213895  | -0.745512 | -1.835734 |
| 126 | 1 | 0 | 6.715019  | -1.770859 | -3.194050 |
| 127 | 1 | 0 | 7.296311  | -0.124784 | -3.491118 |
| 128 | 1 | 0 | 3.490812  | 0.009187  | -3.960053 |
| 129 | 1 | 0 | 5.023874  | 0.316852  | -4.809013 |
| 130 | 1 | 0 | 4.542755  | -1.339797 | -4.418502 |
| 131 | 6 | 0 | 4.161649  | 3.076218  | 1.107750  |
| 132 | 6 | 0 | 3.300875  | 4.351466  | 1.168614  |
| 133 | 6 | 0 | 5.329886  | 3.166524  | 2.111928  |
| 134 | 1 | 0 | 3.523522  | 2.244668  | 1.418472  |
| 135 | 1 | 0 | 2.500947  | 4.332368  | 0.421750  |
| 136 | 1 | 0 | 2.843072  | 4.443818  | 2.160344  |
| 137 | 1 | 0 | 3.896082  | 5.256722  | 1.002116  |
| 138 | 1 | 0 | 5.910814  | 2.238070  | 2.141244  |

|     |   |   |           |           |          |
|-----|---|---|-----------|-----------|----------|
| 139 | 1 | 0 | 6.013841  | 3.980532  | 1.843285 |
| 140 | 1 | 0 | 4.953985  | 3.360925  | 3.123644 |
| 141 | 6 | 0 | -2.968088 | -3.321508 | 1.645460 |
| 142 | 6 | 0 | -4.271330 | -3.867817 | 2.271760 |
| 143 | 6 | 0 | -2.513381 | -2.057672 | 2.388959 |
| 144 | 1 | 0 | -2.190630 | -4.073469 | 1.831767 |
| 145 | 1 | 0 | -4.569388 | -4.818868 | 1.817842 |
| 146 | 1 | 0 | -4.138807 | -4.028274 | 3.348743 |
| 147 | 1 | 0 | -5.098928 | -3.159828 | 2.142981 |
| 148 | 1 | 0 | -1.641902 | -1.597628 | 1.917709 |
| 149 | 1 | 0 | -3.311784 | -1.312674 | 2.458598 |
| 150 | 1 | 0 | -2.240688 | -2.333748 | 3.414864 |

-----  
full(m-2) nhcx-x40b

Standard orientation:

| Center<br>Number | Atomic<br>Number | Atomic<br>Type | Coordinates (Angstroms) |           |           |
|------------------|------------------|----------------|-------------------------|-----------|-----------|
|                  |                  |                | X                       | Y         | Z         |
| 1                | 6                | 0              | -1.157061               | 1.018766  | 1.278811  |
| 2                | 5                | 0              | -0.170109               | 1.545751  | 0.000000  |
| 3                | 5                | 0              | -2.673140               | 0.336866  | 0.898530  |
| 4                | 5                | 0              | -1.244451               | -0.605635 | 1.404162  |
| 5                | 5                | 0              | -1.244451               | -0.605635 | -1.404162 |
| 6                | 1                | 0              | -1.149512               | 1.585723  | 2.207560  |
| 7                | 1                | 0              | -2.491250               | 2.743913  | 0.000000  |
| 8                | 1                | 0              | 0.850578                | 0.910563  | 0.000000  |
| 9                | 1                | 0              | -3.629497               | 0.525048  | 1.587769  |
| 10               | 1                | 0              | -1.318604               | -1.047636 | 2.512379  |
| 11               | 1                | 0              | -1.149512               | 1.585723  | -2.207560 |
| 12               | 1                | 0              | -3.629497               | 0.525048  | -1.587769 |
| 13               | 1                | 0              | 0.567973                | -0.988669 | -0.000000 |
| 14               | 1                | 0              | -2.934608               | -2.085992 | -0.000000 |
| 15               | 1                | 0              | -1.318604               | -1.047636 | -2.512379 |
| 16               | 6                | 0              | 0.391437                | 3.106102  | 0.000000  |
| 17               | 7                | 0              | 1.748110                | 3.324916  | 0.000000  |
| 18               | 7                | 0              | -0.135369               | 4.381259  | 0.000000  |
| 19               | 6                | 0              | 0.874119                | 5.336046  | 0.000000  |
| 20               | 6                | 0              | 2.051696                | 4.675198  | 0.000000  |
| 21               | 1                | 0              | 0.644747                | 6.389146  | 0.000000  |
| 22               | 1                | 0              | 3.071403                | 5.024668  | 0.000000  |
| 23               | 5                | 0              | -2.029853               | 1.660583  | 0.000000  |
| 24               | 5                | 0              | -0.516391               | -1.511081 | -0.000000 |
| 25               | 5                | 0              | -2.231690               | -1.113969 | -0.000000 |
| 26               | 6                | 0              | -1.157061               | 1.018766  | -1.278811 |
| 27               | 5                | 0              | -2.673140               | 0.336866  | -0.898530 |
| 28               | 6                | 0              | -0.427632               | -3.130089 | -0.000000 |
| 29               | 7                | 0              | -0.399742               | -3.979239 | 1.078870  |
| 30               | 6                | 0              | -0.361220               | -5.307902 | 0.675241  |
| 31               | 1                | 0              | -0.331141               | -6.112253 | 1.392123  |
| 32               | 7                | 0              | -0.399742               | -3.979239 | -1.078870 |
| 33               | 6                | 0              | -0.361220               | -5.307902 | -0.675241 |
| 34               | 1                | 0              | -0.331141               | -6.112253 | -1.392123 |

|    |   |   |           |           |           |
|----|---|---|-----------|-----------|-----------|
| 35 | 6 | 0 | 2.823910  | 2.355064  | 0.000000  |
| 36 | 6 | 0 | 3.364155  | 1.957978  | -1.237461 |
| 37 | 6 | 0 | 3.364155  | 1.957978  | 1.237461  |
| 38 | 6 | 0 | 4.465981  | 1.095327  | -1.206965 |
| 39 | 6 | 0 | 4.465981  | 1.095327  | 1.206965  |
| 40 | 6 | 0 | 5.009464  | 0.663349  | 0.000000  |
| 41 | 1 | 0 | 4.904872  | 0.760073  | -2.142246 |
| 42 | 1 | 0 | 4.904872  | 0.760073  | 2.142246  |
| 43 | 1 | 0 | 5.866285  | -0.005331 | 0.000000  |
| 44 | 6 | 0 | -1.501935 | 4.881978  | 0.000000  |
| 45 | 6 | 0 | -2.103937 | 5.184555  | -1.236101 |
| 46 | 6 | 0 | -2.103937 | 5.184555  | 1.236101  |
| 47 | 6 | 0 | -3.358458 | 5.804084  | -1.205068 |
| 48 | 6 | 0 | -3.358458 | 5.804084  | 1.205068  |
| 49 | 6 | 0 | -3.981501 | 6.112856  | 0.000000  |
| 50 | 1 | 0 | -3.854757 | 6.045423  | -2.140241 |
| 51 | 1 | 0 | -3.854757 | 6.045423  | 2.140241  |
| 52 | 1 | 0 | -4.956634 | 6.592397  | 0.000000  |
| 53 | 6 | 0 | -0.305816 | -3.660888 | -2.489677 |
| 54 | 6 | 0 | -1.477121 | -3.674906 | -3.271052 |
| 55 | 6 | 0 | 0.974903  | -3.470433 | -3.040734 |
| 56 | 6 | 0 | -1.333923 | -3.450022 | -4.644694 |
| 57 | 6 | 0 | 1.056314  | -3.230155 | -4.417692 |
| 58 | 6 | 0 | -0.085086 | -3.216000 | -5.212746 |
| 59 | 1 | 0 | -2.216759 | -3.448463 | -5.276669 |
| 60 | 1 | 0 | 2.029241  | -3.066311 | -4.872788 |
| 61 | 1 | 0 | -0.000678 | -3.032265 | -6.280811 |
| 62 | 6 | 0 | -0.305816 | -3.660888 | 2.489677  |
| 63 | 6 | 0 | -1.477121 | -3.674906 | 3.271052  |
| 64 | 6 | 0 | 0.974903  | -3.470433 | 3.040734  |
| 65 | 6 | 0 | -1.333923 | -3.450022 | 4.644694  |
| 66 | 6 | 0 | 1.056314  | -3.230155 | 4.417692  |
| 67 | 6 | 0 | -0.085086 | -3.216000 | 5.212746  |
| 68 | 1 | 0 | -2.216759 | -3.448463 | 5.276669  |
| 69 | 1 | 0 | 2.029241  | -3.066311 | 4.872788  |
| 70 | 1 | 0 | -0.000678 | -3.032265 | 6.280811  |
| 71 | 6 | 0 | -1.449200 | 4.867582  | 2.577303  |
| 72 | 6 | 0 | -2.385938 | 4.069241  | 3.504076  |
| 73 | 6 | 0 | -0.953112 | 6.152440  | 3.271158  |
| 74 | 1 | 0 | -0.575162 | 4.236703  | 2.387590  |
| 75 | 1 | 0 | -2.752266 | 3.162410  | 3.014068  |
| 76 | 1 | 0 | -1.849413 | 3.774881  | 4.413645  |
| 77 | 1 | 0 | -3.253601 | 4.663121  | 3.813967  |
| 78 | 1 | 0 | -0.234091 | 6.696877  | 2.648318  |
| 79 | 1 | 0 | -1.786580 | 6.830955  | 3.488485  |
| 80 | 1 | 0 | -0.462016 | 5.909863  | 4.220946  |
| 81 | 6 | 0 | -1.449200 | 4.867582  | -2.577303 |
| 82 | 6 | 0 | -0.953112 | 6.152440  | -3.271158 |
| 83 | 6 | 0 | -2.385938 | 4.069241  | -3.504076 |
| 84 | 1 | 0 | -0.575162 | 4.236703  | -2.387590 |
| 85 | 1 | 0 | -0.234091 | 6.696877  | -2.648318 |
| 86 | 1 | 0 | -0.462016 | 5.909863  | -4.220946 |
| 87 | 1 | 0 | -1.786580 | 6.830955  | -3.488485 |

|     |   |   |           |           |           |
|-----|---|---|-----------|-----------|-----------|
| 88  | 1 | 0 | -2.752266 | 3.162410  | -3.014068 |
| 89  | 1 | 0 | -3.253601 | 4.663121  | -3.813967 |
| 90  | 1 | 0 | -1.849413 | 3.774881  | -4.413645 |
| 91  | 6 | 0 | 2.254234  | -3.566451 | -2.214896 |
| 92  | 6 | 0 | 3.051399  | -2.251813 | -2.227888 |
| 93  | 6 | 0 | 3.124719  | -4.752510 | -2.676350 |
| 94  | 1 | 0 | 1.976165  | -3.757486 | -1.174840 |
| 95  | 1 | 0 | 2.445564  | -1.426436 | -1.845372 |
| 96  | 1 | 0 | 3.943407  | -2.342564 | -1.596309 |
| 97  | 1 | 0 | 3.385128  | -1.994927 | -3.240589 |
| 98  | 1 | 0 | 2.572790  | -5.698173 | -2.627458 |
| 99  | 1 | 0 | 3.467704  | -4.621338 | -3.709317 |
| 100 | 1 | 0 | 4.012808  | -4.844482 | -2.039562 |
| 101 | 6 | 0 | -2.856387 | -3.958552 | -2.683456 |
| 102 | 6 | 0 | -3.310308 | -5.392018 | -3.030211 |
| 103 | 6 | 0 | -3.913366 | -2.929809 | -3.123508 |
| 104 | 1 | 0 | -2.781013 | -3.883602 | -1.595285 |
| 105 | 1 | 0 | -2.601704 | -6.145133 | -2.665858 |
| 106 | 1 | 0 | -4.286967 | -5.602583 | -2.578573 |
| 107 | 1 | 0 | -3.406373 | -5.524370 | -4.114806 |
| 108 | 1 | 0 | -3.597681 | -1.914542 | -2.871460 |
| 109 | 1 | 0 | -4.110299 | -2.980215 | -4.201429 |
| 110 | 1 | 0 | -4.859861 | -3.131538 | -2.608684 |
| 111 | 6 | 0 | 2.254234  | -3.566451 | 2.214896  |
| 112 | 6 | 0 | 3.124719  | -4.752510 | 2.676350  |
| 113 | 6 | 0 | 3.051399  | -2.251813 | 2.227888  |
| 114 | 1 | 0 | 1.976165  | -3.757486 | 1.174840  |
| 115 | 1 | 0 | 2.572790  | -5.698173 | 2.627458  |
| 116 | 1 | 0 | 4.012808  | -4.844482 | 2.039562  |
| 117 | 1 | 0 | 3.467704  | -4.621338 | 3.709317  |
| 118 | 1 | 0 | 2.445564  | -1.426436 | 1.845372  |
| 119 | 1 | 0 | 3.385128  | -1.994927 | 3.240589  |
| 120 | 1 | 0 | 3.943407  | -2.342564 | 1.596309  |
| 121 | 6 | 0 | -2.856387 | -3.958552 | 2.683456  |
| 122 | 6 | 0 | -3.913366 | -2.929809 | 3.123508  |
| 123 | 6 | 0 | -3.310308 | -5.392018 | 3.030211  |
| 124 | 1 | 0 | -2.781013 | -3.883602 | 1.595285  |
| 125 | 1 | 0 | -3.597681 | -1.914542 | 2.871460  |
| 126 | 1 | 0 | -4.859861 | -3.131538 | 2.608684  |
| 127 | 1 | 0 | -4.110299 | -2.980215 | 4.201429  |
| 128 | 1 | 0 | -2.601704 | -6.145133 | 2.665858  |
| 129 | 1 | 0 | -3.406373 | -5.524370 | 4.114806  |
| 130 | 1 | 0 | -4.286967 | -5.602583 | 2.578573  |
| 131 | 6 | 0 | 2.805156  | 2.441000  | 2.573009  |
| 132 | 6 | 0 | 3.862484  | 3.228811  | 3.371715  |
| 133 | 6 | 0 | 2.224859  | 1.284456  | 3.408133  |
| 134 | 1 | 0 | 1.980137  | 3.129358  | 2.366343  |
| 135 | 1 | 0 | 4.251886  | 4.077833  | 2.797878  |
| 136 | 1 | 0 | 3.425558  | 3.617412  | 4.298988  |
| 137 | 1 | 0 | 4.713808  | 2.595523  | 3.647178  |
| 138 | 1 | 0 | 1.439456  | 0.753116  | 2.862432  |
| 139 | 1 | 0 | 3.001559  | 0.561313  | 3.681761  |
| 140 | 1 | 0 | 1.792003  | 1.673835  | 4.337510  |

|     |   |   |          |          |           |
|-----|---|---|----------|----------|-----------|
| 141 | 6 | 0 | 2.805156 | 2.441000 | -2.573009 |
| 142 | 6 | 0 | 2.224859 | 1.284456 | -3.408133 |
| 143 | 6 | 0 | 3.862484 | 3.228811 | -3.371715 |
| 144 | 1 | 0 | 1.980137 | 3.129358 | -2.366343 |
| 145 | 1 | 0 | 1.439456 | 0.753116 | -2.862432 |
| 146 | 1 | 0 | 1.792003 | 1.673835 | -4.337510 |
| 147 | 1 | 0 | 3.001559 | 0.561313 | -3.681761 |
| 148 | 1 | 0 | 4.251886 | 4.077833 | -2.797878 |
| 149 | 1 | 0 | 4.713808 | 2.595523 | -3.647178 |
| 150 | 1 | 0 | 3.425558 | 3.617412 | -4.298988 |

-----  
full(m-2)

Standard orientation:

| Center<br>Number | Atomic<br>Number | Atomic<br>Type | Coordinates (Angstroms) |           |           |
|------------------|------------------|----------------|-------------------------|-----------|-----------|
|                  |                  |                | X                       | Y         | Z         |
| 1                | 6                | 0              | -1.302474               | -0.735291 | 1.273184  |
| 2                | 5                | 0              | -0.439062               | -1.447617 | -0.000000 |
| 3                | 5                | 0              | -2.682845               | 0.198906  | 0.895100  |
| 4                | 5                | 0              | -1.115768               | 0.881132  | 1.402399  |
| 5                | 5                | 0              | -1.115768               | 0.881132  | -1.402399 |
| 6                | 1                | 0              | -1.395200               | -1.274754 | 2.208911  |
| 7                | 1                | 0              | -2.914387               | -2.239356 | -0.000000 |
| 8                | 1                | 0              | 0.725911                | -1.098807 | -0.000000 |
| 9                | 1                | 0              | -3.649123               | 0.189683  | 1.595455  |
| 10               | 1                | 0              | -1.081703               | 1.357655  | 2.503667  |
| 11               | 1                | 0              | -1.395200               | -1.274754 | -2.208911 |
| 12               | 1                | 0              | -3.649123               | 0.189683  | -1.595455 |
| 13               | 1                | 0              | 0.672501                | 0.856932  | 0.000000  |
| 14               | 1                | 0              | -2.545353               | 2.598200  | 0.000000  |
| 15               | 1                | 0              | -1.081703               | 1.357655  | -2.503667 |
| 16               | 6                | 0              | -0.405332               | -3.112094 | -0.000000 |
| 17               | 7                | 0              | -0.350388               | -3.952919 | -1.079160 |
| 18               | 7                | 0              | -0.350388               | -3.952919 | 1.079160  |
| 19               | 6                | 0              | -0.269758               | -5.281018 | 0.675200  |
| 20               | 6                | 0              | -0.269758               | -5.281018 | -0.675200 |
| 21               | 1                | 0              | -0.214321               | -6.083570 | 1.392582  |
| 22               | 1                | 0              | -0.214321               | -6.083570 | -1.392582 |
| 23               | 5                | 0              | -2.291678               | -1.222107 | -0.000000 |
| 24               | 5                | 0              | -0.235901               | 1.638178  | 0.000000  |
| 25               | 5                | 0              | -1.995924               | 1.548661  | 0.000000  |
| 26               | 6                | 0              | -1.302474               | -0.735291 | -1.273184 |
| 27               | 5                | 0              | -2.682845               | 0.198906  | -0.895100 |
| 28               | 6                | 0              | 0.356686                | 3.108075  | 0.000000  |
| 29               | 7                | 0              | 1.713266                | 3.360048  | 0.000000  |
| 30               | 6                | 0              | 1.983525                | 4.721744  | 0.000000  |
| 31               | 1                | 0              | 2.994180                | 5.096720  | 0.000000  |
| 32               | 7                | 0              | -0.198937               | 4.373788  | 0.000000  |
| 33               | 6                | 0              | 0.791731                | 5.353016  | 0.000000  |
| 34               | 1                | 0              | 0.537575                | 6.400309  | 0.000000  |
| 35               | 6                | 0              | -0.262966               | -3.617106 | -2.487976 |
| 36               | 6                | 0              | -1.433293               | -3.655570 | -3.273069 |

|    |   |   |           |           |           |
|----|---|---|-----------|-----------|-----------|
| 37 | 6 | 0 | 1.012524  | -3.369257 | -3.030508 |
| 38 | 6 | 0 | -1.297047 | -3.377246 | -4.638012 |
| 39 | 6 | 0 | 1.085257  | -3.086569 | -4.400173 |
| 40 | 6 | 0 | -0.055968 | -3.081679 | -5.195181 |
| 41 | 1 | 0 | -2.177978 | -3.388216 | -5.272233 |
| 42 | 1 | 0 | 2.052072  | -2.878083 | -4.848988 |
| 43 | 1 | 0 | 0.022349  | -2.858173 | -6.255778 |
| 44 | 6 | 0 | -0.262966 | -3.617106 | 2.487976  |
| 45 | 6 | 0 | -1.433293 | -3.655570 | 3.273069  |
| 46 | 6 | 0 | 1.012524  | -3.369257 | 3.030508  |
| 47 | 6 | 0 | -1.297047 | -3.377246 | 4.638012  |
| 48 | 6 | 0 | 1.085257  | -3.086569 | 4.400173  |
| 49 | 6 | 0 | -0.055968 | -3.081679 | 5.195181  |
| 50 | 1 | 0 | -2.177978 | -3.388216 | 5.272233  |
| 51 | 1 | 0 | 2.052072  | -2.878083 | 4.848988  |
| 52 | 1 | 0 | 0.022349  | -2.858173 | 6.255778  |
| 53 | 6 | 0 | -1.579165 | 4.822666  | 0.000000  |
| 54 | 6 | 0 | -2.194882 | 5.100711  | 1.235537  |
| 55 | 6 | 0 | -2.194882 | 5.100711  | -1.235537 |
| 56 | 6 | 0 | -3.472158 | 5.672011  | 1.205034  |
| 57 | 6 | 0 | -3.472158 | 5.672011  | -1.205034 |
| 58 | 6 | 0 | -4.106537 | 5.957001  | 0.000000  |
| 59 | 1 | 0 | -3.977115 | 5.894743  | 2.140265  |
| 60 | 1 | 0 | -3.977115 | 5.894743  | -2.140265 |
| 61 | 1 | 0 | -5.099168 | 6.399911  | 0.000000  |
| 62 | 6 | 0 | 2.790907  | 2.402723  | 0.000000  |
| 63 | 6 | 0 | 3.333654  | 2.003342  | 1.236679  |
| 64 | 6 | 0 | 3.333654  | 2.003342  | -1.236679 |
| 65 | 6 | 0 | 4.445020  | 1.152347  | 1.206977  |
| 66 | 6 | 0 | 4.445020  | 1.152347  | -1.206977 |
| 67 | 6 | 0 | 4.994172  | 0.727323  | 0.000000  |
| 68 | 1 | 0 | 4.891061  | 0.826835  | 2.142555  |
| 69 | 1 | 0 | 4.891061  | 0.826835  | -2.142555 |
| 70 | 1 | 0 | 5.861463  | 0.071748  | 0.000000  |
| 71 | 6 | 0 | 2.787255  | 2.505383  | 2.570544  |
| 72 | 6 | 0 | 2.341480  | 1.358542  | 3.494559  |
| 73 | 6 | 0 | 3.811518  | 3.419208  | 3.273625  |
| 74 | 1 | 0 | 1.898021  | 3.107532  | 2.365930  |
| 75 | 1 | 0 | 1.561905  | 0.755368  | 3.021036  |
| 76 | 1 | 0 | 1.931423  | 1.768288  | 4.425264  |
| 77 | 1 | 0 | 3.179468  | 0.703664  | 3.761621  |
| 78 | 1 | 0 | 4.095954  | 4.267493  | 2.640296  |
| 79 | 1 | 0 | 4.727596  | 2.872732  | 3.528195  |
| 80 | 1 | 0 | 3.390917  | 3.817594  | 4.204437  |
| 81 | 6 | 0 | 2.787255  | 2.505383  | -2.570544 |
| 82 | 6 | 0 | 3.811518  | 3.419208  | -3.273625 |
| 83 | 6 | 0 | 2.341480  | 1.358542  | -3.494559 |
| 84 | 1 | 0 | 1.898021  | 3.107532  | -2.365930 |
| 85 | 1 | 0 | 4.095954  | 4.267493  | -2.640296 |
| 86 | 1 | 0 | 3.390917  | 3.817594  | -4.204437 |
| 87 | 1 | 0 | 4.727596  | 2.872732  | -3.528195 |
| 88 | 1 | 0 | 1.561905  | 0.755368  | -3.021036 |
| 89 | 1 | 0 | 3.179468  | 0.703664  | -3.761621 |



|     |   |   |           |           |           |
|-----|---|---|-----------|-----------|-----------|
| 90  | 1 | 0 | 1.931423  | 1.768288  | -4.425264 |
| 91  | 6 | 0 | -1.523368 | 4.814799  | 2.575459  |
| 92  | 6 | 0 | -1.045096 | 6.120484  | 3.242965  |
| 93  | 6 | 0 | -2.433656 | 4.012983  | 3.523654  |
| 94  | 1 | 0 | -0.642638 | 4.194107  | 2.386581  |
| 95  | 1 | 0 | -0.342405 | 6.668077  | 2.604325  |
| 96  | 1 | 0 | -0.540137 | 5.903407  | 4.191970  |
| 97  | 1 | 0 | -1.889400 | 6.786959  | 3.457283  |
| 98  | 1 | 0 | -2.758015 | 3.079257  | 3.056897  |
| 99  | 1 | 0 | -3.321361 | 4.584816  | 3.819390  |
| 100 | 1 | 0 | -1.885486 | 3.761107  | 4.439182  |
| 101 | 6 | 0 | -1.523368 | 4.814799  | -2.575459 |
| 102 | 6 | 0 | -2.433656 | 4.012983  | -3.523654 |
| 103 | 6 | 0 | -1.045096 | 6.120484  | -3.242965 |
| 104 | 1 | 0 | -0.642638 | 4.194107  | -2.386581 |
| 105 | 1 | 0 | -2.758015 | 3.079257  | -3.056897 |
| 106 | 1 | 0 | -1.885486 | 3.761107  | -4.439182 |
| 107 | 1 | 0 | -3.321361 | 4.584816  | -3.819390 |
| 108 | 1 | 0 | -0.342405 | 6.668077  | -2.604325 |
| 109 | 1 | 0 | -1.889400 | 6.786959  | -3.457283 |
| 110 | 1 | 0 | -0.540137 | 5.903407  | -4.191970 |
| 111 | 6 | 0 | -2.799568 | -4.027770 | -2.702586 |
| 112 | 6 | 0 | -3.175759 | -5.469619 | -3.104916 |
| 113 | 6 | 0 | -3.910524 | -3.043548 | -3.111628 |
| 114 | 1 | 0 | -2.731760 | -3.992881 | -1.611658 |
| 115 | 1 | 0 | -2.426727 | -6.196467 | -2.769604 |
| 116 | 1 | 0 | -4.138918 | -5.749445 | -2.662515 |
| 117 | 1 | 0 | -3.265589 | -5.564630 | -4.193653 |
| 118 | 1 | 0 | -3.669805 | -2.019767 | -2.812944 |
| 119 | 1 | 0 | -4.091393 | -3.056775 | -4.192941 |
| 120 | 1 | 0 | -4.849195 | -3.324276 | -2.620570 |
| 121 | 6 | 0 | 2.295333  | -3.462318 | -2.209636 |
| 122 | 6 | 0 | 3.107544  | -2.157665 | -2.238499 |
| 123 | 6 | 0 | 3.149644  | -4.661601 | -2.669378 |
| 124 | 1 | 0 | 2.022330  | -3.641934 | -1.166202 |
| 125 | 1 | 0 | 2.519079  | -1.319991 | -1.856137 |
| 126 | 1 | 0 | 4.001381  | -2.257229 | -1.611550 |
| 127 | 1 | 0 | 3.440351  | -1.910825 | -3.253562 |
| 128 | 1 | 0 | 2.590341  | -5.602222 | -2.607229 |
| 129 | 1 | 0 | 3.482321  | -4.540902 | -3.706918 |
| 130 | 1 | 0 | 4.043161  | -4.755672 | -2.040950 |
| 131 | 6 | 0 | 2.295333  | -3.462318 | 2.209636  |
| 132 | 6 | 0 | 3.149644  | -4.661601 | 2.669378  |
| 133 | 6 | 0 | 3.107544  | -2.157665 | 2.238499  |
| 134 | 1 | 0 | 2.022330  | -3.641934 | 1.166202  |
| 135 | 1 | 0 | 2.590341  | -5.602222 | 2.607229  |
| 136 | 1 | 0 | 4.043161  | -4.755672 | 2.040950  |
| 137 | 1 | 0 | 3.482321  | -4.540902 | 3.706918  |
| 138 | 1 | 0 | 2.519079  | -1.319991 | 1.856137  |
| 139 | 1 | 0 | 3.440351  | -1.910825 | 3.253562  |
| 140 | 1 | 0 | 4.001381  | -2.257229 | 1.611550  |
| 141 | 6 | 0 | -2.799568 | -4.027770 | 2.702586  |
| 142 | 6 | 0 | -3.910524 | -3.043548 | 3.111628  |

|     |   |   |           |           |          |
|-----|---|---|-----------|-----------|----------|
| 143 | 6 | 0 | -3.175759 | -5.469619 | 3.104916 |
| 144 | 1 | 0 | -2.731760 | -3.992881 | 1.611658 |
| 145 | 1 | 0 | -3.669805 | -2.019767 | 2.812944 |
| 146 | 1 | 0 | -4.849195 | -3.324276 | 2.620570 |
| 147 | 1 | 0 | -4.091393 | -3.056775 | 4.192941 |
| 148 | 1 | 0 | -2.426727 | -6.196467 | 2.769604 |
| 149 | 1 | 0 | -3.265589 | -5.564630 | 4.193653 |
| 150 | 1 | 0 | -4.138918 | -5.749445 | 2.662515 |

-----  
full(5)

Standard orientation:

| Center<br>Number | Atomic<br>Number | Atomic<br>Type | Coordinates (Angstroms) |           |           |
|------------------|------------------|----------------|-------------------------|-----------|-----------|
|                  |                  |                | X                       | Y         | Z         |
| 1                | 5                | 0              | 1.463651                | 0.299169  | -0.581540 |
| 2                | 5                | 0              | 1.030362                | -1.316348 | -1.227275 |
| 3                | 5                | 0              | -1.365162               | -0.463411 | -2.424441 |
| 4                | 5                | 0              | -0.667299               | -1.658107 | -1.320139 |
| 5                | 5                | 0              | -1.486694               | -0.198416 | -0.642133 |
| 6                | 5                | 0              | -0.044585               | 0.637469  | -2.885815 |
| 7                | 5                | 0              | 0.194340                | -1.121710 | -2.782021 |
| 8                | 6                | 0              | -1.188370               | 1.094443  | -1.718286 |
| 9                | 1                | 0              | 0.080897                | -1.294105 | 1.151044  |
| 10               | 1                | 0              | 0.967311                | 1.345603  | -0.244685 |
| 11               | 1                | 0              | 1.865733                | -2.150000 | -1.131520 |
| 12               | 1                | 0              | -2.350998               | -0.588108 | -3.085937 |
| 13               | 1                | 0              | -1.081748               | -2.769331 | -1.251153 |
| 14               | 1                | 0              | 2.194935                | 0.075282  | -2.834731 |
| 15               | 1                | 0              | -0.523362               | 1.716419  | -1.114882 |
| 16               | 1                | 0              | -0.032362               | 1.203102  | -3.941076 |
| 17               | 1                | 0              | 0.456966                | -1.816945 | -3.715355 |
| 18               | 1                | 0              | -2.009545               | 1.694604  | -2.097364 |
| 19               | 6                | 0              | -2.922498               | -0.327997 | 0.013892  |
| 20               | 7                | 0              | -3.467853               | -1.397617 | 0.698310  |
| 21               | 6                | 0              | -4.755528               | -1.104959 | 1.133466  |
| 22               | 1                | 0              | -5.337778               | -1.829142 | 1.678340  |
| 23               | 7                | 0              | -3.926829               | 0.620993  | 0.045945  |
| 24               | 6                | 0              | -5.041374               | 0.149104  | 0.731579  |
| 25               | 1                | 0              | -5.918931               | 0.760798  | 0.861546  |
| 26               | 6                | 0              | 2.982828                | 0.367141  | -0.038245 |
| 27               | 7                | 0              | 3.470466                | 1.489268  | 0.594086  |
| 28               | 6                | 0              | 4.822561                | 1.365879  | 0.879508  |
| 29               | 1                | 0              | 5.368138                | 2.152480  | 1.374831  |
| 30               | 7                | 0              | 4.089224                | -0.451992 | -0.136658 |
| 31               | 6                | 0              | 5.207564                | 0.155316  | 0.424772  |
| 32               | 1                | 0              | 6.162052                | -0.344661 | 0.443280  |
| 33               | 6                | 0              | 1.297462                | 0.057999  | -2.222442 |
| 34               | 5                | 0              | -0.005824               | -0.779832 | 0.071821  |
| 35               | 6                | 0              | -3.964404               | 1.968019  | -0.486605 |
| 36               | 6                | 0              | -4.586569               | 2.186482  | -1.733724 |
| 37               | 6                | 0              | -3.502032               | 3.021943  | 0.323778  |
| 38               | 6                | 0              | -4.712784               | 3.511698  | -2.166911 |

|    |   |   |           |           |           |
|----|---|---|-----------|-----------|-----------|
| 39 | 6 | 0 | -3.650276 | 4.326696  | -0.162633 |
| 40 | 6 | 0 | -4.247096 | 4.571963  | -1.394863 |
| 41 | 1 | 0 | -5.181715 | 3.715026  | -3.124755 |
| 42 | 1 | 0 | -3.299838 | 5.161312  | 0.437078  |
| 43 | 1 | 0 | -4.353895 | 5.592350  | -1.753615 |
| 44 | 6 | 0 | -2.943762 | -2.729543 | 0.945252  |
| 45 | 6 | 0 | -3.224538 | -3.743496 | 0.005801  |
| 46 | 6 | 0 | -2.316745 | -2.988974 | 2.179875  |
| 47 | 6 | 0 | -2.819405 | -5.044504 | 0.323403  |
| 48 | 6 | 0 | -1.930277 | -4.309609 | 2.440714  |
| 49 | 6 | 0 | -2.172941 | -5.326022 | 1.522687  |
| 50 | 1 | 0 | -3.010583 | -5.847879 | -0.380841 |
| 51 | 1 | 0 | -1.438157 | -4.546198 | 3.378560  |
| 52 | 1 | 0 | -1.863431 | -6.343816 | 1.746124  |
| 53 | 6 | 0 | 2.781565  | 2.709519  | 0.958099  |
| 54 | 6 | 0 | 2.671804  | 3.740963  | 0.003833  |
| 55 | 6 | 0 | 2.390950  | 2.871881  | 2.301017  |
| 56 | 6 | 0 | 2.142678  | 4.962365  | 0.435919  |
| 57 | 6 | 0 | 1.877300  | 4.118827  | 2.679204  |
| 58 | 6 | 0 | 1.754647  | 5.155195  | 1.759306  |
| 59 | 1 | 0 | 2.044855  | 5.778383  | -0.273945 |
| 60 | 1 | 0 | 1.571816  | 4.277880  | 3.709543  |
| 61 | 1 | 0 | 1.356860  | 6.116570  | 2.073737  |
| 62 | 6 | 0 | 4.261160  | -1.790762 | -0.677874 |
| 63 | 6 | 0 | 4.743613  | -1.930223 | -1.993609 |
| 64 | 6 | 0 | 4.086048  | -2.888489 | 0.187256  |
| 65 | 6 | 0 | 5.029966  | -3.226302 | -2.440160 |
| 66 | 6 | 0 | 4.393317  | -4.158495 | -0.311871 |
| 67 | 6 | 0 | 4.857440  | -4.330087 | -1.612271 |
| 68 | 1 | 0 | 5.396400  | -3.370554 | -3.451839 |
| 69 | 1 | 0 | 4.263503  | -5.026316 | 0.327766  |
| 70 | 1 | 0 | 5.086305  | -5.326545 | -1.980779 |
| 71 | 6 | 0 | -3.990617 | -3.477985 | -1.288932 |
| 72 | 6 | 0 | -5.480924 | -3.845427 | -1.120683 |
| 73 | 6 | 0 | -3.399527 | -4.207505 | -2.508568 |
| 74 | 1 | 0 | -3.928026 | -2.407158 | -1.503301 |
| 75 | 1 | 0 | -5.953368 | -3.284791 | -0.306838 |
| 76 | 1 | 0 | -6.033752 | -3.629118 | -2.042723 |
| 77 | 1 | 0 | -5.597031 | -4.913938 | -0.902086 |
| 78 | 1 | 0 | -2.339242 | -3.973896 | -2.631262 |
| 79 | 1 | 0 | -3.513628 | -5.295537 | -2.432428 |
| 80 | 1 | 0 | -3.926254 | -3.889739 | -3.415717 |
| 81 | 6 | 0 | -2.123479 | -1.910487 | 3.244110  |
| 82 | 6 | 0 | -0.774321 | -2.012707 | 3.974864  |
| 83 | 6 | 0 | -3.275193 | -1.943012 | 4.272532  |
| 84 | 1 | 0 | -2.141675 | -0.938460 | 2.741236  |
| 85 | 1 | 0 | 0.056562  | -2.008940 | 3.265137  |
| 86 | 1 | 0 | -0.655774 | -1.156629 | 4.648736  |
| 87 | 1 | 0 | -0.707187 | -2.918083 | 4.589780  |
| 88 | 1 | 0 | -4.252123 | -1.788632 | 3.803687  |
| 89 | 1 | 0 | -3.303079 | -2.907428 | 4.794034  |
| 90 | 1 | 0 | -3.137988 | -1.157103 | 5.025178  |
| 91 | 6 | 0 | -2.904715 | 2.787516  | 1.706712  |

|     |   |   |           |           |           |
|-----|---|---|-----------|-----------|-----------|
| 92  | 6 | 0 | -3.919825 | 3.155857  | 2.808501  |
| 93  | 6 | 0 | -1.579945 | 3.539395  | 1.907373  |
| 94  | 1 | 0 | -2.681446 | 1.721224  | 1.804155  |
| 95  | 1 | 0 | -4.845830 | 2.577721  | 2.713747  |
| 96  | 1 | 0 | -3.497458 | 2.956276  | 3.800575  |
| 97  | 1 | 0 | -4.183738 | 4.219372  | 2.762533  |
| 98  | 1 | 0 | -0.850516 | 3.273696  | 1.137109  |
| 99  | 1 | 0 | -1.715983 | 4.627123  | 1.887254  |
| 100 | 1 | 0 | -1.149817 | 3.282943  | 2.881082  |
| 101 | 6 | 0 | -5.136776 | 1.051305  | -2.593757 |
| 102 | 6 | 0 | -4.689699 | 1.151305  | -4.063893 |
| 103 | 6 | 0 | -6.675679 | 0.988440  | -2.499459 |
| 104 | 1 | 0 | -4.739143 | 0.109694  | -2.204039 |
| 105 | 1 | 0 | -3.600322 | 1.193038  | -4.147491 |
| 106 | 1 | 0 | -5.034622 | 0.269378  | -4.615554 |
| 107 | 1 | 0 | -5.110641 | 2.033027  | -4.561255 |
| 108 | 1 | 0 | -7.015148 | 0.847314  | -1.467297 |
| 109 | 1 | 0 | -7.131463 | 1.911552  | -2.877470 |
| 110 | 1 | 0 | -7.060802 | 0.154121  | -3.097401 |
| 111 | 6 | 0 | 4.994538  | -0.742579 | -2.919232 |
| 112 | 6 | 0 | 4.397491  | -0.953011 | -4.323800 |
| 113 | 6 | 0 | 6.501909  | -0.426952 | -3.016255 |
| 114 | 1 | 0 | 4.502054  | 0.133795  | -2.486496 |
| 115 | 1 | 0 | 3.338550  | -1.222718 | -4.274281 |
| 116 | 1 | 0 | 4.489182  | -0.031054 | -4.909528 |
| 117 | 1 | 0 | 4.923361  | -1.741451 | -4.874612 |
| 118 | 1 | 0 | 6.934049  | -0.200134 | -2.035225 |
| 119 | 1 | 0 | 7.054461  | -1.275872 | -3.436253 |
| 120 | 1 | 0 | 6.670617  | 0.439267  | -3.667026 |
| 121 | 6 | 0 | 3.593933  | -2.740414 | 1.623388  |
| 122 | 6 | 0 | 4.740541  | -2.985492 | 2.625524  |
| 123 | 6 | 0 | 2.392692  | -3.656112 | 1.921220  |
| 124 | 1 | 0 | 3.247498  | -1.711740 | 1.760341  |
| 125 | 1 | 0 | 5.576979  | -2.296609 | 2.459621  |
| 126 | 1 | 0 | 4.386868  | -2.846370 | 3.654153  |
| 127 | 1 | 0 | 5.129211  | -4.007389 | 2.540455  |
| 128 | 1 | 0 | 1.565760  | -3.454608 | 1.234743  |
| 129 | 1 | 0 | 2.659095  | -4.716857 | 1.844420  |
| 130 | 1 | 0 | 2.038385  | -3.481758 | 2.943843  |
| 131 | 6 | 0 | 3.144071  | 3.584811  | -1.438064 |
| 132 | 6 | 0 | 4.433247  | 4.396825  | -1.679621 |
| 133 | 6 | 0 | 2.052372  | 3.960130  | -2.456207 |
| 134 | 1 | 0 | 3.380443  | 2.530679  | -1.605498 |
| 135 | 1 | 0 | 5.234062  | 4.096441  | -0.993871 |
| 136 | 1 | 0 | 4.791433  | 4.247295  | -2.704901 |
| 137 | 1 | 0 | 4.259284  | 5.470395  | -1.538917 |
| 138 | 1 | 0 | 1.156902  | 3.348271  | -2.318695 |
| 139 | 1 | 0 | 1.769728  | 5.017090  | -2.381809 |
| 140 | 1 | 0 | 2.418946  | 3.788494  | -3.474532 |
| 141 | 6 | 0 | 2.519441  | 1.760153  | 3.338285  |
| 142 | 6 | 0 | 1.148176  | 1.362063  | 3.914244  |
| 143 | 6 | 0 | 3.503486  | 2.144034  | 4.460791  |
| 144 | 1 | 0 | 2.921908  | 0.873308  | 2.840432  |

|     |   |   |          |          |          |
|-----|---|---|----------|----------|----------|
| 145 | 1 | 0 | 0.472324 | 1.032919 | 3.118972 |
| 146 | 1 | 0 | 1.265092 | 0.536873 | 4.626219 |
| 147 | 1 | 0 | 0.676949 | 2.196425 | 4.447647 |
| 148 | 1 | 0 | 4.495551 | 2.385080 | 4.061900 |
| 149 | 1 | 0 | 3.151279 | 3.016687 | 5.023287 |
| 150 | 1 | 0 | 3.616095 | 1.314944 | 5.169140 |

-----  
full(p-2)

Standard orientation:

| Center<br>Number | Atomic<br>Number | Atomic<br>Type | Coordinates (Angstroms) |           |           |
|------------------|------------------|----------------|-------------------------|-----------|-----------|
|                  |                  |                | X                       | Y         | Z         |
| 1                | 6                | 0              | -0.987660               | -1.184454 | -1.181272 |
| 2                | 5                | 0              | -1.544596               | 0.099397  | -0.297419 |
| 3                | 5                | 0              | -1.381334               | 0.247990  | -2.075086 |
| 4                | 5                | 0              | 0.591468                | -1.493680 | -1.147732 |
| 5                | 5                | 0              | -0.128661               | -0.877716 | -2.646539 |
| 6                | 5                | 0              | -0.591287               | 1.493504  | -1.148463 |
| 7                | 5                | 0              | 1.544658                | -0.099399 | -0.297384 |
| 8                | 5                | 0              | 0.128723                | 0.876833  | -2.647002 |
| 9                | 5                | 0              | 1.381395                | -0.248535 | -2.075018 |
| 10               | 6                | 0              | 0.987792                | 1.184185  | -1.181912 |
| 11               | 1                | 0              | -1.625035               | -2.053483 | -1.306860 |
| 12               | 1                | 0              | -0.956937               | 0.264610  | 0.745371  |
| 13               | 1                | 0              | -2.426471               | 0.352069  | -2.642992 |
| 14               | 1                | 0              | 0.958751                | -2.627652 | -1.090716 |
| 15               | 1                | 0              | -0.297827               | -1.547927 | -3.619034 |
| 16               | 1                | 0              | -0.958619               | 2.627451  | -1.091568 |
| 17               | 1                | 0              | 0.957110                | -0.263531 | 0.745651  |
| 18               | 1                | 0              | 0.297900                | 1.546532  | -3.619850 |
| 19               | 1                | 0              | 2.426574                | -0.352869 | -2.642823 |
| 20               | 1                | 0              | 1.625228                | 2.053133  | -1.307756 |
| 21               | 6                | 0              | 3.125152                | -0.204007 | 0.017396  |
| 22               | 7                | 0              | 4.113416                | 0.741501  | -0.106310 |
| 23               | 6                | 0              | 5.322685                | 0.265310  | 0.391717  |
| 24               | 1                | 0              | 6.210047                | 0.877009  | 0.387008  |
| 25               | 7                | 0              | 3.761018                | -1.273907 | 0.593723  |
| 26               | 6                | 0              | 5.101665                | -0.992432 | 0.830092  |
| 27               | 1                | 0              | 5.757229                | -1.718178 | 1.282935  |
| 28               | 6                | 0              | -3.125047               | 0.203997  | 0.017410  |
| 29               | 7                | 0              | -4.113430               | -0.741384 | -0.106271 |
| 30               | 6                | 0              | -5.322617               | -0.265075 | 0.391876  |
| 31               | 1                | 0              | -6.210034               | -0.876692 | 0.387258  |
| 32               | 7                | 0              | -3.760767               | 1.273944  | 0.593866  |
| 33               | 6                | 0              | -5.101412               | 0.992611  | 0.830320  |
| 34               | 1                | 0              | -5.756852               | 1.718377  | 1.283315  |
| 35               | 6                | 0              | 3.210966                | -2.570365 | 0.933420  |
| 36               | 6                | 0              | 3.342937                | -3.621746 | 0.003657  |
| 37               | 6                | 0              | 2.669766                | -2.752741 | 2.219630  |
| 38               | 6                | 0              | 2.886821                | -4.884783 | 0.396742  |
| 39               | 6                | 0              | 2.224309                | -4.037089 | 2.555928  |
| 40               | 6                | 0              | 2.327624                | -5.091692 | 1.654399  |

|    |   |   |           |           |           |
|----|---|---|-----------|-----------|-----------|
| 41 | 1 | 0 | 2.967775  | -5.717658 | -0.294643 |
| 42 | 1 | 0 | 1.800828  | -4.213925 | 3.540189  |
| 43 | 1 | 0 | 1.977569  | -6.081636 | 1.935492  |
| 44 | 6 | 0 | -3.210513 | 2.570314  | 0.933535  |
| 45 | 6 | 0 | -2.669232 | 2.752558  | 2.219722  |
| 46 | 6 | 0 | -3.342348 | 3.621743  | 0.003805  |
| 47 | 6 | 0 | -2.223403 | 4.036781  | 2.556004  |
| 48 | 6 | 0 | -2.885928 | 4.884675  | 0.396901  |
| 49 | 6 | 0 | -2.326530 | 5.091420  | 1.654497  |
| 50 | 1 | 0 | -1.799773 | 4.213468  | 3.540225  |
| 51 | 1 | 0 | -2.966815 | 5.717613  | -0.294413 |
| 52 | 1 | 0 | -1.976207 | 6.081277  | 1.935562  |
| 53 | 6 | 0 | 4.028563  | 2.106268  | -0.589544 |
| 54 | 6 | 0 | 4.465813  | 2.388378  | -1.899969 |
| 55 | 6 | 0 | 3.615804  | 3.112396  | 0.306216  |
| 56 | 6 | 0 | 4.465319  | 3.729309  | -2.303323 |
| 57 | 6 | 0 | 3.632216  | 4.433878  | -0.154856 |
| 58 | 6 | 0 | 4.051390  | 4.742606  | -1.444864 |
| 59 | 1 | 0 | 4.791711  | 3.980793  | -3.307750 |
| 60 | 1 | 0 | 3.312195  | 5.231424  | 0.509205  |
| 61 | 1 | 0 | 4.055345  | 5.775651  | -1.782399 |
| 62 | 6 | 0 | -4.028828 | -2.106157 | -0.589534 |
| 63 | 6 | 0 | -4.466388 | -2.388228 | -1.899857 |
| 64 | 6 | 0 | -3.616037 | -3.112319 | 0.306182  |
| 65 | 6 | 0 | -4.466195 | -3.729179 | -2.303157 |
| 66 | 6 | 0 | -3.632770 | -4.433816 | -0.154830 |
| 67 | 6 | 0 | -4.052264 | -4.742513 | -1.444746 |
| 68 | 1 | 0 | -4.792838 | -3.980655 | -3.307506 |
| 69 | 1 | 0 | -3.312742 | -5.231389 | 0.509194  |
| 70 | 1 | 0 | -4.056466 | -5.775566 | -1.782253 |
| 71 | 6 | 0 | 2.619343  | -1.632904 | 3.254669  |
| 72 | 6 | 0 | 3.705402  | -1.837810 | 4.331050  |
| 73 | 6 | 0 | 1.230915  | -1.482745 | 3.898433  |
| 74 | 1 | 0 | 2.833932  | -0.689435 | 2.744484  |
| 75 | 1 | 0 | 4.707165  | -1.884635 | 3.889034  |
| 76 | 1 | 0 | 3.692378  | -1.011807 | 5.052209  |
| 77 | 1 | 0 | 3.542374  | -2.770373 | 4.884387  |
| 78 | 1 | 0 | 0.465231  | -1.310684 | 3.136765  |
| 79 | 1 | 0 | 0.949713  | -2.370211 | 4.477706  |
| 80 | 1 | 0 | 1.228561  | -0.629007 | 4.586018  |
| 81 | 6 | 0 | 4.005959  | -3.436320 | -1.359522 |
| 82 | 6 | 0 | 3.227946  | -4.100833 | -2.509345 |
| 83 | 6 | 0 | 5.460884  | -3.951746 | -1.326044 |
| 84 | 1 | 0 | 4.033776  | -2.364511 | -1.577259 |
| 85 | 1 | 0 | 2.197588  | -3.738983 | -2.544760 |
| 86 | 1 | 0 | 3.709264  | -3.860007 | -3.464233 |
| 87 | 1 | 0 | 3.214894  | -5.193722 | -2.419092 |
| 88 | 1 | 0 | 6.058785  | -3.445308 | -0.560027 |
| 89 | 1 | 0 | 5.490314  | -5.027365 | -1.113786 |
| 90 | 1 | 0 | 5.946408  | -3.787016 | -2.295212 |
| 91 | 6 | 0 | 3.172751  | 2.822596  | 1.736334  |
| 92 | 6 | 0 | 1.753516  | 3.352144  | 2.012108  |
| 93 | 6 | 0 | 4.187282  | 3.382618  | 2.753533  |

|     |   |   |           |           |           |
|-----|---|---|-----------|-----------|-----------|
| 94  | 1 | 0 | 3.139324  | 1.737888  | 1.871663  |
| 95  | 1 | 0 | 1.030957  | 2.930968  | 1.307009  |
| 96  | 1 | 0 | 1.444140  | 3.079665  | 3.027726  |
| 97  | 1 | 0 | 1.707100  | 4.444977  | 1.936392  |
| 98  | 1 | 0 | 5.189274  | 2.968603  | 2.591693  |
| 99  | 1 | 0 | 4.262640  | 4.474201  | 2.682852  |
| 100 | 1 | 0 | 3.879026  | 3.134780  | 3.776242  |
| 101 | 6 | 0 | 4.955324  | 1.311297  | -2.864243 |
| 102 | 6 | 0 | 6.490523  | 1.359889  | -3.010031 |
| 103 | 6 | 0 | 4.274397  | 1.405855  | -4.242352 |
| 104 | 1 | 0 | 4.689746  | 0.336641  | -2.445359 |
| 105 | 1 | 0 | 6.996449  | 1.228420  | -2.046567 |
| 106 | 1 | 0 | 6.835132  | 0.565423  | -3.682407 |
| 107 | 1 | 0 | 6.817735  | 2.319173  | -3.428700 |
| 108 | 1 | 0 | 3.185544  | 1.376020  | -4.148472 |
| 109 | 1 | 0 | 4.552553  | 2.323910  | -4.773334 |
| 110 | 1 | 0 | 4.584510  | 0.560233  | -4.867075 |
| 111 | 6 | 0 | -2.619199 | 1.632715  | 3.254783  |
| 112 | 6 | 0 | -3.705362 | 1.837912  | 4.331002  |
| 113 | 6 | 0 | -1.230918 | 1.482189  | 3.898790  |
| 114 | 1 | 0 | -2.833962 | 0.689294  | 2.744575  |
| 115 | 1 | 0 | -4.707097 | 1.884463  | 3.888895  |
| 116 | 1 | 0 | -3.692322 | 1.012185  | 5.052480  |
| 117 | 1 | 0 | -3.542469 | 2.770703  | 4.883988  |
| 118 | 1 | 0 | -0.465073 | 1.310417  | 3.137229  |
| 119 | 1 | 0 | -0.949807 | 2.369372  | 4.478545  |
| 120 | 1 | 0 | -1.228777 | 0.628134  | 4.585981  |
| 121 | 6 | 0 | -4.005635 | 3.436538  | -1.359279 |
| 122 | 6 | 0 | -3.227748 | 4.101076  | -2.509185 |
| 123 | 6 | 0 | -5.460505 | 3.952095  | -1.325504 |
| 124 | 1 | 0 | -4.033651 | 2.364751  | -1.577112 |
| 125 | 1 | 0 | -2.197457 | 3.739072  | -2.544862 |
| 126 | 1 | 0 | -3.709307 | 3.860497  | -3.464013 |
| 127 | 1 | 0 | -3.214493 | 5.193945  | -2.418748 |
| 128 | 1 | 0 | -6.058185 | 3.445933  | -0.559129 |
| 129 | 1 | 0 | -5.489812 | 5.027784  | -1.113575 |
| 130 | 1 | 0 | -5.946329 | 3.787090  | -2.294473 |
| 131 | 6 | 0 | -3.172706 | -2.822504 | 1.736207  |
| 132 | 6 | 0 | -1.753732 | -3.352734 | 2.012035  |
| 133 | 6 | 0 | -4.187503 | -3.381810 | 2.753540  |
| 134 | 1 | 0 | -3.138658 | -1.737792 | 1.871332  |
| 135 | 1 | 0 | -1.031001 | -2.932106 | 1.306784  |
| 136 | 1 | 0 | -1.444153 | -3.080099 | 3.027551  |
| 137 | 1 | 0 | -1.707867 | -4.445613 | 1.936658  |
| 138 | 1 | 0 | -5.189295 | -2.967339 | 2.591624  |
| 139 | 1 | 0 | -4.263392 | -4.473371 | 2.683052  |
| 140 | 1 | 0 | -3.879124 | -3.133927 | 3.776202  |
| 141 | 6 | 0 | -4.955957 | -1.311104 | -2.864048 |
| 142 | 6 | 0 | -6.491204 | -1.359443 | -3.009459 |
| 143 | 6 | 0 | -4.275417 | -1.405848 | -4.242335 |
| 144 | 1 | 0 | -4.690102 | -0.336476 | -2.445274 |
| 145 | 1 | 0 | -6.996883 | -1.227950 | -2.045870 |
| 146 | 1 | 0 | -6.835855 | -0.564894 | -3.681714 |

|     |   |   |           |           |           |
|-----|---|---|-----------|-----------|-----------|
| 147 | 1 | 0 | -6.818653 | -2.318658 | -3.428100 |
| 148 | 1 | 0 | -3.186534 | -1.376211 | -4.148747 |
| 149 | 1 | 0 | -4.553882 | -2.323879 | -4.773197 |
| 150 | 1 | 0 | -4.585550 | -0.560202 | -4.867017 |

-----  
full(o-2a)

Standard orientation:

| Center<br>Number | Atomic<br>Number | Atomic<br>Type | Coordinates (Angstroms) |           |           |
|------------------|------------------|----------------|-------------------------|-----------|-----------|
|                  |                  |                | X                       | Y         | Z         |
| 1                | 5                | 0              | -1.559644               | 0.208056  | -0.374338 |
| 2                | 5                | 0              | -1.395012               | -0.328519 | -2.061570 |
| 3                | 5                | 0              | 0.998577                | 1.213276  | -1.893807 |
| 4                | 5                | 0              | 0.032765                | 0.186706  | -2.969882 |
| 5                | 5                | 0              | 1.616316                | 0.049843  | -0.367881 |
| 6                | 5                | 0              | -0.047981               | -1.436323 | -2.232466 |
| 7                | 5                | 0              | 1.403239                | -0.464067 | -2.058267 |
| 8                | 6                | 0              | 0.725923                | -1.291922 | -0.712639 |
| 9                | 1                | 0              | -1.420894               | 2.248001  | -2.291018 |
| 10               | 1                | 0              | -0.915860               | 0.849201  | 0.398636  |
| 11               | 1                | 0              | -2.427831               | -0.603487 | -2.565480 |
| 12               | 1                | 0              | 1.658214                | 2.114313  | -2.287107 |
| 13               | 1                | 0              | 0.036434                | 0.274124  | -4.155002 |
| 14               | 1                | 0              | -1.305005               | -2.148480 | -0.465422 |
| 15               | 1                | 0              | 1.043512                | 0.750095  | 0.409606  |
| 16               | 1                | 0              | -0.097829               | -2.478385 | -2.793898 |
| 17               | 1                | 0              | 2.406559                | -0.848827 | -2.562500 |
| 18               | 1                | 0              | 1.115082                | -2.268758 | -0.453244 |
| 19               | 6                | 0              | 3.170710                | -0.092476 | 0.066508  |
| 20               | 7                | 0              | 3.830369                | -1.193356 | 0.534057  |
| 21               | 6                | 0              | 5.141608                | -0.874833 | 0.862036  |
| 22               | 1                | 0              | 5.817949                | -1.616343 | 1.255129  |
| 23               | 7                | 0              | 4.091246                | 0.917582  | 0.121589  |
| 24               | 6                | 0              | 5.304687                | 0.441002  | 0.597298  |
| 25               | 1                | 0              | 6.161218                | 1.087276  | 0.694712  |
| 26               | 6                | 0              | -3.099296               | 0.250089  | 0.099189  |
| 27               | 7                | 0              | -4.082743               | -0.700117 | 0.087213  |
| 28               | 6                | 0              | -5.216599               | -0.227158 | 0.734591  |
| 29               | 1                | 0              | -6.099610               | -0.836438 | 0.834908  |
| 30               | 7                | 0              | -3.651240               | 1.320976  | 0.748160  |
| 31               | 6                | 0              | -4.948087               | 1.035369  | 1.141498  |
| 32               | 1                | 0              | -5.550033               | 1.755966  | 1.669666  |
| 33               | 6                | 0              | -0.812218               | -1.217087 | -0.718577 |
| 34               | 5                | 0              | -0.835482               | 1.298184  | -1.895482 |
| 35               | 6                | 0              | -4.084304               | -2.029393 | -0.512447 |
| 36               | 6                | 0              | -3.644005               | -3.123992 | 0.262507  |
| 37               | 6                | 0              | -4.643084               | -2.178705 | -1.800403 |
| 38               | 6                | 0              | -3.726112               | -4.395041 | -0.319018 |
| 39               | 6                | 0              | -4.699203               | -3.476134 | -2.324684 |
| 40               | 6                | 0              | -4.240078               | -4.570691 | -1.600005 |
| 41               | 1                | 0              | -3.394011               | -5.260979 | 0.244013  |
| 42               | 1                | 0              | -5.114922               | -3.630532 | -3.314737 |



|    |   |   |           |           |           |
|----|---|---|-----------|-----------|-----------|
| 43 | 1 | 0 | -4.294996 | -5.566719 | -2.030071 |
| 44 | 6 | 0 | 3.321513  | -2.536326 | 0.757722  |
| 45 | 6 | 0 | 3.524903  | -3.511599 | -0.241828 |
| 46 | 6 | 0 | 2.730889  | -2.826056 | 2.003742  |
| 47 | 6 | 0 | 3.060553  | -4.805234 | 0.027302  |
| 48 | 6 | 0 | 2.283020  | -4.136771 | 2.211378  |
| 49 | 6 | 0 | 2.437866  | -5.114572 | 1.233398  |
| 50 | 1 | 0 | 3.195686  | -5.583141 | -0.717127 |
| 51 | 1 | 0 | 1.821073  | -4.396680 | 3.159032  |
| 52 | 1 | 0 | 2.087536  | -6.126264 | 1.417669  |
| 53 | 6 | 0 | -3.048725 | 2.629563  | 0.957453  |
| 54 | 6 | 0 | -2.397730 | 2.912290  | 2.176537  |
| 55 | 6 | 0 | -3.209034 | 3.595261  | -0.066115 |
| 56 | 6 | 0 | -1.816566 | 4.184402  | 2.300932  |
| 57 | 6 | 0 | -2.615678 | 4.846903  | 0.130500  |
| 58 | 6 | 0 | -1.909245 | 5.135890  | 1.293387  |
| 59 | 1 | 0 | -1.297725 | 4.429936  | 3.223934  |
| 60 | 1 | 0 | -2.709913 | 5.606815  | -0.636883 |
| 61 | 1 | 0 | -1.448160 | 6.111212  | 1.421393  |
| 62 | 6 | 0 | 3.976521  | 2.277521  | -0.392187 |
| 63 | 6 | 0 | 4.359907  | 2.483616  | -1.736446 |
| 64 | 6 | 0 | 3.599248  | 3.335946  | 0.465743  |
| 65 | 6 | 0 | 4.289643  | 3.788205  | -2.238732 |
| 66 | 6 | 0 | 3.533149  | 4.613262  | -0.110053 |
| 67 | 6 | 0 | 3.861307  | 4.842097  | -1.441956 |
| 68 | 1 | 0 | 4.574394  | 3.977354  | -3.268382 |
| 69 | 1 | 0 | 3.235673  | 5.450442  | 0.515207  |
| 70 | 1 | 0 | 3.803490  | 5.846791  | -1.850923 |
| 71 | 6 | 0 | -4.071457 | 3.353991  | -1.306941 |
| 72 | 6 | 0 | -3.597613 | 4.119232  | -2.556207 |
| 73 | 6 | 0 | -5.543942 | 3.729096  | -1.020073 |
| 74 | 1 | 0 | -4.034493 | 2.285733  | -1.547630 |
| 75 | 1 | 0 | -2.532916 | 3.971098  | -2.753051 |
| 76 | 1 | 0 | -4.155156 | 3.768475  | -3.431104 |
| 77 | 1 | 0 | -3.785497 | 5.195280  | -2.468758 |
| 78 | 1 | 0 | -5.970907 | 3.155013  | -0.192721 |
| 79 | 1 | 0 | -5.626904 | 4.792206  | -0.767162 |
| 80 | 1 | 0 | -6.160382 | 3.545429  | -1.907330 |
| 81 | 6 | 0 | 4.905530  | 1.371629  | -2.632771 |
| 82 | 6 | 0 | 6.445169  | 1.459870  | -2.717387 |
| 83 | 6 | 0 | 4.295021  | 1.375123  | -4.046787 |
| 84 | 1 | 0 | 4.654048  | 0.406759  | -2.181732 |
| 85 | 1 | 0 | 6.916340  | 1.395697  | -1.730459 |
| 86 | 1 | 0 | 6.839901  | 0.644103  | -3.333546 |
| 87 | 1 | 0 | 6.757897  | 2.406267  | -3.172885 |
| 88 | 1 | 0 | 3.202893  | 1.342087  | -4.016625 |
| 89 | 1 | 0 | 4.594815  | 2.259507  | -4.619560 |
| 90 | 1 | 0 | 4.647632  | 0.498298  | -4.600977 |
| 91 | 6 | 0 | -2.352593 | 2.043960  | 3.441935  |
| 92 | 6 | 0 | -2.177736 | 0.525552  | 3.292587  |
| 93 | 6 | 0 | -3.568022 | 2.358380  | 4.343257  |
| 94 | 1 | 0 | -1.466422 | 2.396846  | 3.984654  |
| 95 | 1 | 0 | -1.375461 | 0.272266  | 2.594835  |

|     |   |   |           |           |           |
|-----|---|---|-----------|-----------|-----------|
| 96  | 1 | 0 | -1.920447 | 0.102357  | 4.270307  |
| 97  | 1 | 0 | -3.097788 | 0.032497  | 2.965859  |
| 98  | 1 | 0 | -3.662591 | 3.432752  | 4.529966  |
| 99  | 1 | 0 | -4.502868 | 2.011257  | 3.888230  |
| 100 | 1 | 0 | -3.463524 | 1.851794  | 5.309561  |
| 101 | 6 | 0 | 4.262176  | -3.225665 | -1.547996 |
| 102 | 6 | 0 | 3.527457  | -3.776973 | -2.783934 |
| 103 | 6 | 0 | 5.702977  | -3.776708 | -1.485634 |
| 104 | 1 | 0 | 4.328243  | -2.140016 | -1.671724 |
| 105 | 1 | 0 | 2.498099  | -3.410549 | -2.840260 |
| 106 | 1 | 0 | 4.048250  | -3.461366 | -3.694411 |
| 107 | 1 | 0 | 3.501480  | -4.872247 | -2.789376 |
| 108 | 1 | 0 | 6.267884  | -3.351426 | -0.648660 |
| 109 | 1 | 0 | 5.702356  | -4.866113 | -1.366291 |
| 110 | 1 | 0 | 6.240689  | -3.540111 | -2.410486 |
| 111 | 6 | 0 | 2.608437  | -1.801239 | 3.127209  |
| 112 | 6 | 0 | 3.516400  | -2.177454 | 4.316001  |
| 113 | 6 | 0 | 1.150748  | -1.612238 | 3.583635  |
| 114 | 1 | 0 | 2.954435  | -0.833994 | 2.750974  |
| 115 | 1 | 0 | 4.563830  | -2.270159 | 4.008551  |
| 116 | 1 | 0 | 3.458652  | -1.410097 | 5.096107  |
| 117 | 1 | 0 | 3.215623  | -3.131795 | 4.762573  |
| 118 | 1 | 0 | 0.507364  | -1.325586 | 2.745786  |
| 119 | 1 | 0 | 0.743977  | -2.528372 | 4.026632  |
| 120 | 1 | 0 | 1.093540  | -0.825211 | 4.343976  |
| 121 | 6 | 0 | -5.239554 | -1.017807 | -2.595418 |
| 122 | 6 | 0 | -6.776608 | -0.992530 | -2.443685 |
| 123 | 6 | 0 | -4.862727 | -1.045555 | -4.088797 |
| 124 | 1 | 0 | -4.847730 | -0.082844 | -2.180700 |
| 125 | 1 | 0 | -7.088178 | -0.903413 | -1.397680 |
| 126 | 1 | 0 | -7.198392 | -0.143670 | -2.993465 |
| 127 | 1 | 0 | -7.222831 | -1.908890 | -2.846275 |
| 128 | 1 | 0 | -3.781213 | -1.113589 | -4.235448 |
| 129 | 1 | 0 | -5.332182 | -1.885459 | -4.612450 |
| 130 | 1 | 0 | -5.214438 | -0.128178 | -4.573211 |
| 131 | 6 | 0 | -3.166446 | -2.975613 | 1.705491  |
| 132 | 6 | 0 | -1.950224 | -3.856666 | 2.043723  |
| 133 | 6 | 0 | -4.321950 | -3.270321 | 2.686747  |
| 134 | 1 | 0 | -2.860295 | -1.936620 | 1.857678  |
| 135 | 1 | 0 | -1.117280 | -3.694209 | 1.351670  |
| 136 | 1 | 0 | -1.598211 | -3.622158 | 3.054218  |
| 137 | 1 | 0 | -2.198441 | -4.923489 | 2.028629  |
| 138 | 1 | 0 | -5.179155 | -2.610030 | 2.517885  |
| 139 | 1 | 0 | -4.671255 | -4.303436 | 2.578546  |
| 140 | 1 | 0 | -3.989737 | -3.132268 | 3.721998  |
| 141 | 6 | 0 | 3.343414  | 3.266206  | 1.978520  |
| 142 | 6 | 0 | 4.608133  | 2.922419  | 2.792843  |
| 143 | 6 | 0 | 2.146779  | 2.412338  | 2.427005  |
| 144 | 1 | 0 | 3.088853  | 4.297205  | 2.252424  |
| 145 | 1 | 0 | 5.464542  | 3.527124  | 2.475114  |
| 146 | 1 | 0 | 4.429895  | 3.127559  | 3.854601  |
| 147 | 1 | 0 | 4.881212  | 1.866095  | 2.708216  |
| 148 | 1 | 0 | 1.234679  | 2.683229  | 1.886056  |

|     |   |   |          |          |           |
|-----|---|---|----------|----------|-----------|
| 149 | 1 | 0 | 2.319969 | 1.343038 | 2.283088  |
| 150 | 1 | 0 | 1.968070 | 2.576027 | 3.496642  |
| 151 | 1 | 0 | 0.103072 | 1.746681 | -1.101293 |

-----  
full(m-2a)

Standard orientation:

| Center<br>Number | Atomic<br>Number | Atomic<br>Type | Coordinates (Angstroms) |           |           |
|------------------|------------------|----------------|-------------------------|-----------|-----------|
|                  |                  |                | X                       | Y         | Z         |
| 1                | 6                | 0              | 1.348646                | -0.797730 | 1.278104  |
| 2                | 5                | 0              | 0.450766                | -1.500522 | 0.000000  |
| 3                | 5                | 0              | 2.704708                | 0.154139  | 0.871120  |
| 4                | 5                | 0              | 1.102209                | 0.787671  | 1.411780  |
| 5                | 5                | 0              | 1.102209                | 0.787671  | -1.411780 |
| 6                | 1                | 0              | 1.444488                | -1.334284 | 2.213362  |
| 7                | 1                | 0              | 2.940786                | -2.285566 | 0.000000  |
| 8                | 1                | 0              | -0.683114               | -1.072257 | 0.000000  |
| 9                | 1                | 0              | 3.641465                | 0.233945  | 1.595592  |
| 10               | 1                | 0              | 1.017661                | 1.310020  | 2.479508  |
| 11               | 1                | 0              | 1.444488                | -1.334284 | -2.213362 |
| 12               | 1                | 0              | 3.641465                | 0.233945  | -1.595592 |
| 13               | 1                | 0              | -0.261057               | 0.999447  | 0.898548  |
| 14               | 1                | 0              | 2.614135                | 2.543255  | -0.000000 |
| 15               | 1                | 0              | 1.017661                | 1.310020  | -2.479508 |
| 16               | 6                | 0              | 0.364676                | -3.152822 | 0.000000  |
| 17               | 7                | 0              | 0.288738                | -3.984477 | -1.080826 |
| 18               | 7                | 0              | 0.288738                | -3.984477 | 1.080826  |
| 19               | 6                | 0              | 0.171506                | -5.307569 | 0.675849  |
| 20               | 6                | 0              | 0.171506                | -5.307569 | -0.675849 |
| 21               | 1                | 0              | 0.094459                | -6.109023 | 1.392464  |
| 22               | 1                | 0              | 0.094459                | -6.109023 | -1.392464 |
| 23               | 5                | 0              | 2.314086                | -1.279235 | 0.000000  |
| 24               | 5                | 0              | 0.275546                | 1.692783  | -0.000000 |
| 25               | 5                | 0              | 2.006770                | 1.530780  | -0.000000 |
| 26               | 6                | 0              | 1.348646                | -0.797730 | -1.278104 |
| 27               | 5                | 0              | 2.704708                | 0.154139  | -0.871120 |
| 28               | 6                | 0              | -0.342929               | 3.180091  | -0.000000 |
| 29               | 7                | 0              | -1.686166               | 3.422474  | -0.000000 |
| 30               | 6                | 0              | -1.940393               | 4.779588  | -0.000000 |
| 31               | 1                | 0              | -2.946431               | 5.166590  | -0.000000 |
| 32               | 7                | 0              | 0.237279                | 4.416538  | -0.000000 |
| 33               | 6                | 0              | -0.735692               | 5.400324  | -0.000000 |
| 34               | 1                | 0              | -0.470461               | 6.444964  | -0.000000 |
| 35               | 6                | 0              | 0.226604                | -3.640377 | -2.491734 |
| 36               | 6                | 0              | 1.406266                | -3.712008 | -3.261892 |
| 37               | 6                | 0              | -1.035954               | -3.351714 | -3.045717 |
| 38               | 6                | 0              | 1.295252                | -3.411442 | -4.624871 |
| 39               | 6                | 0              | -1.081562               | -3.053262 | -4.413395 |
| 40               | 6                | 0              | 0.070360                | -3.071813 | -5.193240 |
| 41               | 1                | 0              | 2.180832                | -3.449535 | -5.251075 |
| 42               | 1                | 0              | -2.036325               | -2.821606 | -4.875832 |
| 43               | 1                | 0              | 0.011567                | -2.839885 | -6.252916 |

|    |   |   |           |           |           |
|----|---|---|-----------|-----------|-----------|
| 44 | 6 | 0 | 0.226604  | -3.640377 | 2.491734  |
| 45 | 6 | 0 | 1.406266  | -3.712008 | 3.261892  |
| 46 | 6 | 0 | -1.035954 | -3.351714 | 3.045717  |
| 47 | 6 | 0 | 1.295252  | -3.411442 | 4.624871  |
| 48 | 6 | 0 | -1.081562 | -3.053262 | 4.413395  |
| 49 | 6 | 0 | 0.070360  | -3.071813 | 5.193240  |
| 50 | 1 | 0 | 2.180832  | -3.449535 | 5.251075  |
| 51 | 1 | 0 | -2.036325 | -2.821606 | 4.875832  |
| 52 | 1 | 0 | 0.011567  | -2.839885 | 6.252916  |
| 53 | 6 | 0 | 1.638554  | 4.825630  | -0.000000 |
| 54 | 6 | 0 | 2.257769  | 5.072532  | 1.239847  |
| 55 | 6 | 0 | 2.257769  | 5.072532  | -1.239847 |
| 56 | 6 | 0 | 3.566411  | 5.567919  | 1.206288  |
| 57 | 6 | 0 | 3.566411  | 5.567919  | -1.206288 |
| 58 | 6 | 0 | 4.215970  | 5.810926  | -0.000000 |
| 59 | 1 | 0 | 4.082680  | 5.768306  | 2.139667  |
| 60 | 1 | 0 | 4.082680  | 5.768306  | -2.139667 |
| 61 | 1 | 0 | 5.231792  | 6.195643  | -0.000000 |
| 62 | 6 | 0 | -2.767337 | 2.454932  | -0.000000 |
| 63 | 6 | 0 | -3.303275 | 2.058384  | 1.241499  |
| 64 | 6 | 0 | -3.303275 | 2.058384  | -1.241499 |
| 65 | 6 | 0 | -4.405752 | 1.195896  | 1.208073  |
| 66 | 6 | 0 | -4.405752 | 1.195896  | -1.208073 |
| 67 | 6 | 0 | -4.948080 | 0.765830  | -0.000000 |
| 68 | 1 | 0 | -4.855165 | 0.870734  | 2.141122  |
| 69 | 1 | 0 | -4.855165 | 0.870734  | -2.141122 |
| 70 | 1 | 0 | -5.810756 | 0.105393  | -0.000000 |
| 71 | 6 | 0 | -2.785381 | 2.589487  | 2.576848  |
| 72 | 6 | 0 | -2.461221 | 1.470925  | 3.583390  |
| 73 | 6 | 0 | -3.787965 | 3.594578  | 3.182613  |
| 74 | 1 | 0 | -1.851801 | 3.131621  | 2.393540  |
| 75 | 1 | 0 | -1.721367 | 0.769687  | 3.185052  |
| 76 | 1 | 0 | -2.051958 | 1.906338  | 4.501581  |
| 77 | 1 | 0 | -3.355066 | 0.901570  | 3.860960  |
| 78 | 1 | 0 | -3.991933 | 4.426459  | 2.499281  |
| 79 | 1 | 0 | -4.744423 | 3.110687  | 3.410366  |
| 80 | 1 | 0 | -3.392205 | 4.011812  | 4.115158  |
| 81 | 6 | 0 | -2.785381 | 2.589487  | -2.576848 |
| 82 | 6 | 0 | -3.787965 | 3.594578  | -3.182613 |
| 83 | 6 | 0 | -2.461221 | 1.470925  | -3.583390 |
| 84 | 1 | 0 | -1.851801 | 3.131621  | -2.393540 |
| 85 | 1 | 0 | -3.991933 | 4.426459  | -2.499281 |
| 86 | 1 | 0 | -3.392205 | 4.011812  | -4.115158 |
| 87 | 1 | 0 | -4.744423 | 3.110687  | -3.410366 |
| 88 | 1 | 0 | -1.721367 | 0.769687  | -3.185052 |
| 89 | 1 | 0 | -3.355066 | 0.901570  | -3.860960 |
| 90 | 1 | 0 | -2.051958 | 1.906338  | -4.501581 |
| 91 | 6 | 0 | 1.564831  | 4.851798  | 2.581894  |
| 92 | 6 | 0 | 1.160908  | 6.197795  | 3.219177  |
| 93 | 6 | 0 | 2.423696  | 4.022874  | 3.555287  |
| 94 | 1 | 0 | 0.645734  | 4.282015  | 2.405396  |
| 95 | 1 | 0 | 0.497865  | 6.776080  | 2.565603  |
| 96 | 1 | 0 | 0.638609  | 6.030370  | 4.167979  |

|     |   |   |           |           |           |
|-----|---|---|-----------|-----------|-----------|
| 97  | 1 | 0 | 2.042464  | 6.814881  | 3.426186  |
| 98  | 1 | 0 | 2.725889  | 3.071061  | 3.109245  |
| 99  | 1 | 0 | 3.328353  | 4.560922  | 3.858757  |
| 100 | 1 | 0 | 1.852080  | 3.808605  | 4.465315  |
| 101 | 6 | 0 | 1.564831  | 4.851798  | -2.581894 |
| 102 | 6 | 0 | 2.423696  | 4.022874  | -3.555287 |
| 103 | 6 | 0 | 1.160908  | 6.197795  | -3.219177 |
| 104 | 1 | 0 | 0.645734  | 4.282015  | -2.405396 |
| 105 | 1 | 0 | 2.725889  | 3.071061  | -3.109245 |
| 106 | 1 | 0 | 1.852080  | 3.808605  | -4.465315 |
| 107 | 1 | 0 | 3.328353  | 4.560922  | -3.858757 |
| 108 | 1 | 0 | 0.497865  | 6.776080  | -2.565603 |
| 109 | 1 | 0 | 2.042464  | 6.814881  | -3.426186 |
| 110 | 1 | 0 | 0.638609  | 6.030370  | -4.167979 |
| 111 | 6 | 0 | 2.750483  | -4.150065 | -2.684182 |
| 112 | 6 | 0 | 3.061675  | -5.605916 | -3.093291 |
| 113 | 6 | 0 | 3.911230  | -3.220284 | -3.083651 |
| 114 | 1 | 0 | 2.677922  | -4.121585 | -1.592452 |
| 115 | 1 | 0 | 2.277038  | -6.298891 | -2.769360 |
| 116 | 1 | 0 | 4.006719  | -5.933141 | -2.645665 |
| 117 | 1 | 0 | 3.155414  | -5.697197 | -4.181387 |
| 118 | 1 | 0 | 3.716112  | -2.181339 | -2.801839 |
| 119 | 1 | 0 | 4.106971  | -3.250531 | -4.161217 |
| 120 | 1 | 0 | 4.829490  | -3.538704 | -2.578407 |
| 121 | 6 | 0 | -2.333262 | -3.433278 | -2.245770 |
| 122 | 6 | 0 | -3.152299 | -2.133971 | -2.311846 |
| 123 | 6 | 0 | -3.175617 | -4.641863 | -2.704774 |
| 124 | 1 | 0 | -2.080789 | -3.595718 | -1.193624 |
| 125 | 1 | 0 | -2.576512 | -1.283203 | -1.936810 |
| 126 | 1 | 0 | -4.054952 | -2.228412 | -1.697480 |
| 127 | 1 | 0 | -3.472242 | -1.907223 | -3.335237 |
| 128 | 1 | 0 | -2.615790 | -5.579609 | -2.617867 |
| 129 | 1 | 0 | -3.486096 | -4.536760 | -3.750372 |
| 130 | 1 | 0 | -4.081064 | -4.729583 | -2.093516 |
| 131 | 6 | 0 | -2.333262 | -3.433278 | 2.245770  |
| 132 | 6 | 0 | -3.175617 | -4.641863 | 2.704774  |
| 133 | 6 | 0 | -3.152299 | -2.133971 | 2.311846  |
| 134 | 1 | 0 | -2.080789 | -3.595718 | 1.193624  |
| 135 | 1 | 0 | -2.615790 | -5.579609 | 2.617867  |
| 136 | 1 | 0 | -4.081064 | -4.729583 | 2.093516  |
| 137 | 1 | 0 | -3.486096 | -4.536760 | 3.750372  |
| 138 | 1 | 0 | -2.576512 | -1.283203 | 1.936810  |
| 139 | 1 | 0 | -3.472242 | -1.907223 | 3.335237  |
| 140 | 1 | 0 | -4.054952 | -2.228412 | 1.697480  |
| 141 | 6 | 0 | 2.750483  | -4.150065 | 2.684182  |
| 142 | 6 | 0 | 3.911230  | -3.220284 | 3.083651  |
| 143 | 6 | 0 | 3.061675  | -5.605916 | 3.093291  |
| 144 | 1 | 0 | 2.677922  | -4.121585 | 1.592452  |
| 145 | 1 | 0 | 3.716112  | -2.181339 | 2.801839  |
| 146 | 1 | 0 | 4.829490  | -3.538704 | 2.578407  |
| 147 | 1 | 0 | 4.106971  | -3.250531 | 4.161217  |
| 148 | 1 | 0 | 2.277038  | -6.298891 | 2.769360  |
| 149 | 1 | 0 | 3.155414  | -5.697197 | 4.181387  |

|     |   |   |           |           |           |
|-----|---|---|-----------|-----------|-----------|
| 150 | 1 | 0 | 4.006719  | -5.933141 | 2.645665  |
| 151 | 1 | 0 | -0.261057 | 0.999447  | -0.898548 |

-----  
full(p-2a)

Standard orientation:

| Center<br>Number | Atomic<br>Number | Atomic<br>Type | Coordinates (Angstroms) |           |           |
|------------------|------------------|----------------|-------------------------|-----------|-----------|
|                  |                  |                | X                       | Y         | Z         |
| 1                | 6                | 0              | -0.904306               | -1.185344 | -1.299537 |
| 2                | 5                | 0              | -1.624520               | -0.055906 | -0.364710 |
| 3                | 5                | 0              | -1.475919               | 0.246415  | -2.094784 |
| 4                | 5                | 0              | 0.725290                | -1.314544 | -1.196388 |
| 5                | 5                | 0              | -0.053311               | -0.678462 | -2.669402 |
| 6                | 5                | 0              | -0.836293               | 1.530206  | -1.110813 |
| 7                | 5                | 0              | 1.536214                | 0.223453  | -0.185488 |
| 8                | 5                | 0              | -0.028549               | 1.081753  | -2.663958 |
| 9                | 5                | 0              | 1.349608                | 0.181589  | -2.119913 |
| 10               | 6                | 0              | 0.736860                | 1.420749  | -1.201499 |
| 11               | 1                | 0              | -1.438162               | -2.103813 | -1.511743 |
| 12               | 1                | 0              | -1.003844               | 0.272178  | 0.615755  |
| 13               | 1                | 0              | -2.497484               | 0.184952  | -2.694020 |
| 14               | 1                | 0              | 1.263431                | -2.364726 | -1.316375 |
| 15               | 1                | 0              | -0.018581               | -1.390800 | -3.618621 |
| 16               | 1                | 0              | -1.344876               | 2.587207  | -0.927166 |
| 17               | 1                | 0              | 1.068215                | 0.551098  | 0.881574  |
| 18               | 1                | 0              | 0.075650                | 1.778361  | -3.619397 |
| 19               | 1                | 0              | 2.402412                | 0.258264  | -2.660336 |
| 20               | 1                | 0              | 1.299004                | 2.346513  | -1.143097 |
| 21               | 6                | 0              | 3.158438                | 0.233606  | -0.012435 |
| 22               | 7                | 0              | 4.079777                | -0.767550 | -0.083609 |
| 23               | 6                | 0              | 5.338547                | -0.284127 | 0.245994  |
| 24               | 1                | 0              | 6.200813                | -0.930522 | 0.251659  |
| 25               | 7                | 0              | 3.859777                | 1.341487  | 0.361614  |
| 26               | 6                | 0              | 5.202100                | 1.034062  | 0.519526  |
| 27               | 1                | 0              | 5.919735                | 1.783059  | 0.812134  |
| 28               | 6                | 0              | -3.190450               | -0.248065 | 0.006763  |
| 29               | 7                | 0              | -4.196501               | 0.673175  | 0.017101  |
| 30               | 6                | 0              | -5.371031               | 0.102804  | 0.488327  |
| 31               | 1                | 0              | -6.277669               | 0.678801  | 0.575890  |
| 32               | 7                | 0              | -3.760833               | -1.397485 | 0.471261  |
| 33               | 6                | 0              | -5.100720               | -1.192769 | 0.769526  |
| 34               | 1                | 0              | -5.719248               | -1.985123 | 1.158384  |
| 35               | 1                | 0              | 1.022670                | -0.976127 | 0.025726  |
| 36               | 6                | 0              | 3.355055                | 2.681808  | 0.616859  |
| 37               | 6                | 0              | 3.454281                | 3.642900  | -0.411740 |
| 38               | 6                | 0              | 2.876006                | 2.979249  | 1.908258  |
| 39               | 6                | 0              | 3.005133                | 4.935934  | -0.117136 |
| 40               | 6                | 0              | 2.438454                | 4.289446  | 2.138589  |
| 41               | 6                | 0              | 2.494969                | 5.254851  | 1.138140  |
| 42               | 1                | 0              | 3.061243                | 5.705014  | -0.880594 |
| 43               | 1                | 0              | 2.061947                | 4.559758  | 3.120109  |
| 44               | 1                | 0              | 2.152668                | 6.265567  | 1.341382  |

|    |   |   |           |           |           |
|----|---|---|-----------|-----------|-----------|
| 45 | 6 | 0 | 3.895922  | -2.178129 | -0.397523 |
| 46 | 6 | 0 | 4.211768  | -2.622517 | -1.696895 |
| 47 | 6 | 0 | 3.517472  | -3.048724 | 0.644817  |
| 48 | 6 | 0 | 4.093727  | -3.995809 | -1.944244 |
| 49 | 6 | 0 | 3.415395  | -4.408994 | 0.333256  |
| 50 | 6 | 0 | 3.693485  | -4.878481 | -0.947099 |
| 51 | 1 | 0 | 4.323562  | -4.377884 | -2.933583 |
| 52 | 1 | 0 | 3.124817  | -5.112802 | 1.106079  |
| 53 | 1 | 0 | 3.609653  | -5.939505 | -1.164696 |
| 54 | 6 | 0 | -3.107935 | -2.662786 | 0.756648  |
| 55 | 6 | 0 | -3.171216 | -3.693035 | -0.205029 |
| 56 | 6 | 0 | -2.522776 | -2.830809 | 2.026890  |
| 57 | 6 | 0 | -2.573295 | -4.913547 | 0.130050  |
| 58 | 6 | 0 | -1.937647 | -4.073570 | 2.302075  |
| 59 | 6 | 0 | -1.955333 | -5.100795 | 1.363739  |
| 60 | 1 | 0 | -2.597126 | -5.731593 | -0.582424 |
| 61 | 1 | 0 | -1.479566 | -4.242790 | 3.271982  |
| 62 | 1 | 0 | -1.500481 | -6.058656 | 1.600216  |
| 63 | 6 | 0 | -4.152661 | 2.083169  | -0.340827 |
| 64 | 6 | 0 | -3.754960 | 3.007638  | 0.645484  |
| 65 | 6 | 0 | -4.613900 | 2.470422  | -1.615390 |
| 66 | 6 | 0 | -3.797647 | 4.364417  | 0.305868  |
| 67 | 6 | 0 | -4.628529 | 3.842194  | -1.896700 |
| 68 | 6 | 0 | -4.222098 | 4.779163  | -0.952459 |
| 69 | 1 | 0 | -3.500325 | 5.106779  | 1.039845  |
| 70 | 1 | 0 | -4.972225 | 4.180921  | -2.868563 |
| 71 | 1 | 0 | -4.246705 | 5.837897  | -1.194790 |
| 72 | 6 | 0 | 4.712426  | -1.699280 | -2.804839 |
| 73 | 6 | 0 | 3.955344  | -1.902495 | -4.130736 |
| 74 | 6 | 0 | 6.230786  | -1.877828 | -3.018543 |
| 75 | 1 | 0 | 4.541087  | -0.664258 | -2.492705 |
| 76 | 1 | 0 | 2.874437  | -1.807140 | -3.995387 |
| 77 | 1 | 0 | 4.275678  | -1.149673 | -4.859295 |
| 78 | 1 | 0 | 4.159505  | -2.885522 | -4.569177 |
| 79 | 1 | 0 | 6.801017  | -1.680103 | -2.103810 |
| 80 | 1 | 0 | 6.465782  | -2.898749 | -3.340035 |
| 81 | 1 | 0 | 6.588840  | -1.191265 | -3.793819 |
| 82 | 6 | 0 | 3.292475  | -2.576606 | 2.079273  |
| 83 | 6 | 0 | 4.563760  | -2.796439 | 2.927402  |
| 84 | 6 | 0 | 2.079324  | -3.245823 | 2.748541  |
| 85 | 1 | 0 | 3.092960  | -1.499290 | 2.061490  |
| 86 | 1 | 0 | 5.428296  | -2.269234 | 2.509900  |
| 87 | 1 | 0 | 4.409593  | -2.434581 | 3.950413  |
| 88 | 1 | 0 | 4.816489  | -3.861434 | 2.980272  |
| 89 | 1 | 0 | 1.175783  | -3.153968 | 2.137383  |
| 90 | 1 | 0 | 2.253704  | -4.311131 | 2.935594  |
| 91 | 1 | 0 | 1.886892  | -2.776055 | 3.719240  |
| 92 | 6 | 0 | 4.074772  | 3.341731  | -1.775672 |
| 93 | 6 | 0 | 5.514292  | 3.896207  | -1.844467 |
| 94 | 6 | 0 | 3.240909  | 3.877598  | -2.954690 |
| 95 | 1 | 0 | 4.132661  | 2.254329  | -1.893674 |
| 96 | 1 | 0 | 6.150351  | 3.487754  | -1.051383 |
| 97 | 1 | 0 | 5.972959  | 3.645803  | -2.807420 |

|     |   |   |           |           |           |
|-----|---|---|-----------|-----------|-----------|
| 98  | 1 | 0 | 5.518585  | 4.987338  | -1.743016 |
| 99  | 1 | 0 | 2.214304  | 3.499585  | -2.936602 |
| 100 | 1 | 0 | 3.200658  | 4.972234  | -2.963418 |
| 101 | 1 | 0 | 3.696691  | 3.562899  | -3.899569 |
| 102 | 6 | 0 | 2.892211  | 1.970591  | 3.054004  |
| 103 | 6 | 0 | 1.546970  | 1.888339  | 3.797079  |
| 104 | 6 | 0 | 4.040370  | 2.289781  | 4.034874  |
| 105 | 1 | 0 | 3.087595  | 0.977686  | 2.636164  |
| 106 | 1 | 0 | 0.725035  | 1.660841  | 3.111126  |
| 107 | 1 | 0 | 1.588658  | 1.099255  | 4.556311  |
| 108 | 1 | 0 | 1.308221  | 2.824309  | 4.313957  |
| 109 | 1 | 0 | 5.013184  | 2.295225  | 3.530866  |
| 110 | 1 | 0 | 3.901084  | 3.272827  | 4.498484  |
| 111 | 1 | 0 | 4.077906  | 1.542447  | 4.835494  |
| 112 | 6 | 0 | -3.909264 | -3.536828 | -1.534208 |
| 113 | 6 | 0 | -5.322047 | -4.153959 | -1.442499 |
| 114 | 6 | 0 | -3.149706 | -4.139203 | -2.731140 |
| 115 | 1 | 0 | -4.028244 | -2.465849 | -1.733045 |
| 116 | 1 | 0 | -5.917405 | -3.700006 | -0.643197 |
| 117 | 1 | 0 | -5.861474 | -4.012545 | -2.385661 |
| 118 | 1 | 0 | -5.265113 | -5.230313 | -1.244262 |
| 119 | 1 | 0 | -2.130846 | -3.747462 | -2.814065 |
| 120 | 1 | 0 | -3.087013 | -5.231060 | -2.668076 |
| 121 | 1 | 0 | -3.677856 | -3.899258 | -3.660063 |
| 122 | 6 | 0 | -2.572221 | -1.758925 | 3.113207  |
| 123 | 6 | 0 | -1.178632 | -1.403765 | 3.660482  |
| 124 | 6 | 0 | -3.518308 | -2.186716 | 4.254561  |
| 125 | 1 | 0 | -2.985132 | -0.844375 | 2.677108  |
| 126 | 1 | 0 | -0.512078 | -1.067790 | 2.859642  |
| 127 | 1 | 0 | -1.260805 | -0.596732 | 4.397495  |
| 128 | 1 | 0 | -0.708936 | -2.257953 | 4.160315  |
| 129 | 1 | 0 | -4.527889 | -2.395248 | 3.883795  |
| 130 | 1 | 0 | -3.155029 | -3.091394 | 4.754936  |
| 131 | 1 | 0 | -3.590763 | -1.393503 | 5.007208  |
| 132 | 6 | 0 | -3.342172 | 2.594818  | 2.055489  |
| 133 | 6 | 0 | -4.476913 | 2.882384  | 3.060723  |
| 134 | 6 | 0 | -2.030148 | 3.262046  | 2.506247  |
| 135 | 1 | 0 | -3.166105 | 1.514424  | 2.060592  |
| 136 | 1 | 0 | -5.401187 | 2.361725  | 2.786547  |
| 137 | 1 | 0 | -4.190430 | 2.556127  | 4.067245  |
| 138 | 1 | 0 | -4.700439 | 3.954312  | 3.105590  |
| 139 | 1 | 0 | -1.223826 | 3.081166  | 1.788583  |
| 140 | 1 | 0 | -2.142619 | 4.345691  | 2.622778  |
| 141 | 1 | 0 | -1.724260 | 2.861594  | 3.479491  |
| 142 | 6 | 0 | -5.145997 | 1.482000  | -2.650841 |
| 143 | 6 | 0 | -4.599594 | 1.746782  | -4.066219 |
| 144 | 6 | 0 | -6.689975 | 1.488704  | -2.667096 |
| 145 | 1 | 0 | -4.820352 | 0.477231  | -2.362222 |
| 146 | 1 | 0 | -3.506911 | 1.788104  | -4.074956 |
| 147 | 1 | 0 | -4.916488 | 0.944092  | -4.741252 |
| 148 | 1 | 0 | -4.980727 | 2.686389  | -4.481062 |
| 149 | 1 | 0 | -7.113701 | 1.239186  | -1.688070 |
| 150 | 1 | 0 | -7.074182 | 2.474636  | -2.952296 |



|     |   |   |           |          |           |
|-----|---|---|-----------|----------|-----------|
| 151 | 1 | 0 | -7.066443 | 0.758588 | -3.392474 |
|-----|---|---|-----------|----------|-----------|

---
